# Supplementary material for: Rethinking the history of common walnut (Juglans regia L.) in Europe: Its origins and human interactions
Source: PubMed Central journal article supplement (PMC5336217; doi:10.1371/journal.pone.0172541), 2017-03-03
Supplement: pone.0172541.s004.pdf [file pone.0172541.s004.pdf]

**S1 Table. List of 450 fossil pollen sites from Eurasia considered in this study.** The geographic coordinates in decimal degrees (Latitude, Longitude), early presence (1700 - 11.923 Ka BP), first detection of discontinuous and continuous occurrence of *Juglans*-type fossil pollen (radiocarbon-dating) during the Holocene and the related citation (a) and the presence/absence of *Juglans*-type fossil pollen and its classification (discontinuous, continuous, in expansion, in contraction and not recorded) in each selected time interval (b) were recorded for each site.

(a)

| Country  | Site name          | Latitude  | Longitude | Early presence cal. yr BP | Age disc. <sup>a</sup> cal. yr BP | Age cont. <sup>a</sup> cal. yr BP | Age disc. <sup>a</sup> cal. yr BP | References |
|----------|--------------------|-----------|-----------|---------------------------|-----------------------------------|-----------------------------------|-----------------------------------|------------|
| Turkey   | Lake Manyas        | 40.200000 | 28.000000 | -                         | -                                 | 2500                              | -                                 | [1]        |
|          | Marmara Sea        | 41.005178 | 28.977125 | -                         | 4750                              | 2000                              | -                                 | [1]        |
|          | Abant Gölü         | 40.600000 | 31.283333 | -                         | -                                 | 5311                              | 2100                              | [2]        |
|          | Yeniçaga Gölü      | 40.783333 | 32.033333 | -                         | 11485                             | 0                                 | 0                                 | [2]        |
|          | Beyşehir Gölü I    | 37.541667 | 31.500000 | -                         | -                                 | 3505                              | 1462                              | [2]        |
|          | Göhlhisar Gölü I   | 37.133333 | 29.600000 | -                         | -                                 | 4260                              | 0                                 | [2]        |
|          | Göhlhisar Gölü II  | 37.133472 | 29.600000 | -                         | 3000                              | 2500                              | 1300                              | [3]        |
|          | Hoyran Gölü        | 38.275000 | 30.875000 | -                         | 4725                              | 2148                              | 859                               | [2]        |
|          | Kararmik Batakligi | 38.425000 | 30.800000 | 15367                     | 6186                              | -                                 | -                                 | [4]        |
|          | Köycegiz Gölü      | 36.875000 | 28.641667 | -                         | 4306                              | -                                 | -                                 | [2]        |
|          | Ova Gölü           | 36.266667 | 29.300000 | -                         | -                                 | 3538                              | 2517                              | [2]        |
|          | Pinarbasi          | 37.466667 | 30.050000 | 16004                     | -                                 | 4349                              | 0                                 | [2]        |
|          | Sögüt Gölü         | 36.997500 | 29.898333 | 16374                     | -                                 | 2647                              | 1290                              | [4]        |
|          | Sagalassos         | 37.660473 | 30.525923 | -                         | -                                 | 2300                              | 1300                              | [5]        |
|          | Ladik Gölü         | 40.916667 | 36.016667 | -                         | 9375                              | 5574                              | -                                 | [2]        |
| Greece   | Lake Van           | 38.500000 | 43.000000 | -                         | 11215                             | 1815                              | -                                 | [6]        |
|          | Kournas            | 35.330383 | 24.276198 | -                         | 3000                              | 1000                              | -                                 | [7]        |
|          | Asi GoniaII        | 35.273964 | 24.283052 | -                         | 448                               | -                                 | -                                 | [8]        |
|          | Asi GoniaI         | 35.273964 | 24.283000 | -                         | 582                               | -                                 | -                                 | [8]        |
|          | Paiko              | 40.953197 | 22.335828 | -                         | -                                 | 2079                              | -                                 | [9]        |
|          | Lailias            | 41.595771 | 24.896196 | -                         | 1711                              | 1503                              | 123                               | [9]        |
|          | Elatia-Rhodopes    | 41.496426 | 24.314432 | -                         | -                                 | 3952                              | -                                 | [9]        |
|          | Kastoria           | 40.520244 | 21.268981 | -                         | -                                 | 1790                              | -                                 | [2]        |
|          | Orestias           | 40.526398 | 21.227013 | -                         | 8203                              | 7515                              | -                                 | [10]       |
|          | KhimaditisIII      | 40.612500 | 21.586111 | -                         | -                                 | 2730                              | -                                 | [11]       |
|          | Vegoritiss         | 40.771625 | 21.799904 | -                         | -                                 | 2816                              | -                                 | [2]        |
|          | Edessa             | 40.818056 | 21.952500 | -                         | -                                 | 4244                              | -                                 | [2]        |
|          | Beles              | 41.319444 | 23.016111 | -                         | 586                               | 522                               | -                                 | [12]       |
|          | Litochoro          | 40.138889 | 22.546111 | -                         | -                                 | 2953                              | -                                 | [13]       |
|          | Tenaghi Philippon  | 40.983333 | 24.783333 | -                         | 2782                              | -                                 | -                                 | [14]       |
|          | Lerna              | 37.550005 | 22.716667 | -                         | 6788                              | 2768                              | 190                               | [15]       |
|          | Trikhonis          | 38.600000 | 21.500000 | -                         | -                                 | 2052                              | 0                                 | [11]       |
|          | IoanninaI          | 39.762500 | 20.730556 | 13474                     | 5264                              | -                                 | -                                 | [2]        |
|          | IoanninaII         | 39.691944 | 20.839722 | -                         | 7383                              | 746                               | -                                 | [2]        |
|          | Halos              | 39.166667 | 22.833333 | -                         | 3681                              | -                                 | -                                 | [2]        |
|          | Xinias             | 39.050000 | 22.266667 | -                         | 8240                              | 4980                              | -                                 | [16]       |
|          | Voukaria           | 38.866667 | 20.833333 | -                         | 830                               | 771                               | 340                               | [17]       |
|          | Pertouli           | 39.524167 | 21.477500 | -                         | 4381                              | 1070                              | -                                 | [13]       |
| Bulgaria | Myrtoon basin      | 36.258055 | 24.258055 | 18000                     | 9700                              | 6200                              | -                                 | [243]      |
|          | Beliya Kanton      | 41.733611 | 24.139722 | 13524                     | -                                 | 11708                             | -                                 | [18]       |
|          | Kupena I           | 41.983333 | 24.333333 | -                         | 9350                              | 7250                              | -                                 | [19]       |
|          | Kupena II          | 41.983347 | 24.333333 | -                         | 9288                              | -                                 | -                                 | [19]       |
|          | Ribno I            | 41.739079 | 23.424769 | -                         | 8400                              | 2200                              | -                                 | [20]       |
|          | Popovo Ezero       | 41.716667 | 23.666667 | -                         | 1150                              | -                                 | -                                 | [21]       |
|          | Mutorog            | 41.516667 | 23.616667 | -                         | 3240                              | 1944                              | -                                 | [22]       |
|          | Trilistnika        | 42.197750 | 23.587904 | -                         | -                                 | 3350                              | -                                 | [23]       |
|          | Suho Ezero         | 42.133333 | 23.416667 | -                         | 2275                              | 1160                              | -                                 | [24]       |
|          | Sozopol            | 42.417263 | 27.696174 | -                         | -                                 | 6139                              | -                                 | [25]       |

|                |                           |           |           |   |       |      |      |      |
|----------------|---------------------------|-----------|-----------|---|-------|------|------|------|
|                | Arkutino I                | 42.366667 | 27.733333 | - | 5012  | -    | -    | [26] |
|                | Arkutino II               | 42.366667 | 27.733347 | - | 6210  | -    | -    | [26] |
|                | Black Sea South           | 42.067500 | 28.485000 | - | 1398  | -    | -    | [27] |
|                | Black Sea Southwest       | 42.184167 | 28.916667 | - | 1547  | -    | -    | [27] |
|                | Black Sea West            | 42.833333 | 29.916667 | - | 7382  | 6475 | -    | [28] |
|                | Duranunlak II             | 43.666667 | 28.550000 | - | 5823  | -    | -    | [29] |
|                | Duranunlak I              | 43.666667 | 28.550000 | - | 8474  | -    | -    | [29] |
|                | Shabla-Ezeretz            | 43.583333 | 28.550000 | - | 8375  | -    | -    | [29] |
|                | Varna I                   | 44.110956 | 27.073560 | - | 5882  | -    | -    | EPD  |
|                | Varna II                  | 43.192123 | 27.807515 | - | 11332 | -    | -    | EPD  |
|                | Srebarna                  | 43.192123 | 27.807514 | - | -     | 2955 | -    | [30] |
|                | Mire Garvan               | 44.116944 | 26.950000 | - | 5309  | 1584 | -    | [31] |
|                | Maleshevska               | 41.666667 | 23.000000 | - | -     | 6750 | -    | [32] |
|                | Osogovo                   | 42.160450 | 22.516726 | - | -     | 3500 | -    | [23] |
|                | Begbunar                  | 42.202577 | 22.588840 | - | -     | 5027 | -    | [33] |
|                | Sredna Gora               | 42.500000 | 25.000000 | - | 1313  | 368  | -    | [34] |
|                | Straldzha mire            | 42.630833 | 26.772778 | - | 3805  | -    | -    | [35] |
|                | Tchokljovo Marsh          | 42.366667 | 22.833333 | - | 6415  | -    | -    | [36] |
|                | Vitosha                   | 42.566658 | 23.283323 | - | -     | 557  | -    | [37] |
| Romania        | AvrigI                    | 45.727863 | 24.377838 | - | 3056  | -    | -    | [38] |
|                | AvrigII                   | 45.721950 | 24.320583 | - | 888   | -    | -    | [38] |
|                | Mohos                     | 46.132081 | 25.904150 | - | 232   | 88   | -    | [39] |
|                | Luci                      | 46.296944 | 25.737500 | - | 2100  | -    | -    | [40] |
|                | Bisoca                    | 45.553231 | 26.687611 | - | 600   | 380  | -    | [41] |
|                | Calineasa                 | 46.608562 | 22.764285 | - | -     | 365  | -    | [42] |
|                | Semenic                   | 45.090515 | 21.996336 | - | 3299  | -    | -    | [43] |
|                | Steregoiu                 | 47.813889 | 23.540278 | - | 361   | -    | -    | [44] |
| Hungary        | Alsópáhok                 | 46.774444 | 17.170278 | - | -     | 1750 | -    | [45] |
|                | Balaton I                 | 46.744444 | 17.400833 | - | 3885  | 1720 | -    | EPD  |
|                | Balaton II                | 47.001667 | 18.104167 | - | 3500  | 2500 | -    | EPD  |
|                | Balaton III               | 46.608567 | 17.735000 | - | 1408  | 1162 | -    | EPD  |
|                | Nagy-Mohos                | 48.326944 | 20.436389 | - | 3573  | -    | -    | [46] |
|                | Pölöske                   | 46.756111 | 16.924722 | - | 1195  | -    | -    | [47] |
|                | Pötréte                   | 46.678889 | 16.933056 | - | 2300  | -    | -    | [46] |
|                | Szigliget                 | 46.800000 | 17.433333 | - | -     | 4086 | -    | [46] |
| Slovakia       | Bobrov                    | 49.445833 | 19.566667 | - | 245   | -    | -    | [48] |
|                | Zlatnicka Dolina          | 49.516667 | 19.283333 | - | 421   | -    | -    | [48] |
|                | Strbské pleso             | 49.122222 | 20.055556 | - | 554   | -    | -    | [49] |
|                | Tlstá hora                | 48.894167 | 17.888611 | - | 4927  | 2289 | -    | [50] |
| Czech Republic | Královec                  | 49.131944 | 18.027778 | - | 1096  | 438  | -    | [50] |
|                | Machová                   | 48.830833 | 17.541111 | - | 1100  | 403  | -    | [50] |
|                | Dvur Ansov                | 48.791667 | 16.387500 | - | 3521  | -    | -    | [51] |
|                | Olbramovice               | 48.991667 | 16.400000 | - | 3224  | -    | -    | [52] |
|                | Vracov                    | 48.977778 | 17.202778 | - | 3370  | 1204 | -    | [52] |
|                | Palasiny                  | 49.688889 | 15.483333 | - | 477   | -    | -    | [52] |
|                | Blato I                   | 49.041667 | 15.191667 | - | 6472  | -    | -    | [53] |
|                | Kozli                     | 49.376389 | 14.025833 | - | 1312  | -    | -    | [54] |
|                | Rezabinec                 | 49.250000 | 14.116667 | - | 976   | -    | -    | [55] |
|                | Borkovicka blata          | 49.216667 | 14.900000 | - | 6310  | 254  | -    | [56] |
|                | Branna                    | 48.950000 | 14.933333 | - | 3091  | -    | -    | [57] |
|                | Loucky                    | 49.325000 | 15.502778 | - | 4842  | -    | -    | [57] |
|                | Chrást                    | 50.227222 | 14.544167 | - | 6092  | -    | -    | [58] |
|                | Velka niva                | 48.924167 | 13.818611 | - | 826   | -    | -    | [59] |
|                | Malá niva                 | 48.913889 | 13.816111 | - | 322   | -    | -    | [60] |
|                | Mrtv8 luh                 | 48.866944 | 13.883056 | - | 585   | -    | -    | [60] |
|                | Stráženská slat           | 48.898889 | 13.742222 | - | 1875  | -    | -    | [61] |
|                | Komoranské jezero         | 50.500000 | 13.500000 | - | 1402  | -    | -    | [61] |
|                | Dolskym                   | 50.852500 | 14.338889 | - | 10546 | -    | -    | [62] |
|                | Na bahne                  | 50.198889 | 15.961389 | - | 110   | -    | -    | [63] |
|                | Velky Ded                 | 50.083333 | 17.216667 | - | -     | 1414 | -    | [64] |
|                | Velky Maj                 | 50.050000 | 17.216667 | - | -     | 1756 | 1695 | EPD  |
|                | Pancavská louka           | 50.766389 | 15.541111 | - | 713   | -    | -    | EPD  |
|                | Pryskyricn8 dul           | 50.887778 | 14.413333 | - | 78    | -    | -    | [65] |
|                | Tpské raseliniste Mire    | 50.738889 | 15.712500 | - | -     | 929  | 94   | [66] |
|                | Tpské raseliniste MireII  | 50.738889 | 15.712500 | - | 3543  | -    | -    | [65] |
|                | Tpské raseliniste MireIII | 50.738889 | 15.712500 | - | 1866  | 433  | -    | [60] |
| Ukraine        | Dovjok Swamp              | 48.750000 | 28.250000 | - | 1016  | -    | -    | [67] |
|                | Maly Podleski             | 49.916667 | 24.016667 | - | 6700  | -    | -    | [68] |
|                | Pecheniya                 | 49.666667 | 23.933333 | - | 3600  | -    | -    | [68] |
|                | Yukharina Balka           | 44.551111 | 33.488056 | - | -     | 1450 | -    | [69] |
| Croatia        | Bokanjacko                | 44.183333 | 15.233333 | - | 2401  | -    | -    | [70] |
|                | Mljet                     | 42.776667 | 17.347325 | - | -     | 3250 | -    | [71] |
| Poland         | Bledowo Lake              | 52.550000 | 20.666667 | - | 893   | -    | -    | [72] |
|                | Giecz                     | 52.319444 | 17.363333 | - | 1260  | -    | -    | [73] |
|                | Lake Goszcz               | 52.583333 | 19.350000 | - | 7994  | -    | -    | [74] |
|                | Lake Skrzetuszewskie      | 52.550000 | 17.360556 | - | 1468  | -    | -    | EPD  |

|             |                                       |           |           |       |       |      |      |       |
|-------------|---------------------------------------|-----------|-----------|-------|-------|------|------|-------|
|             | Slawsko                               | 52.666667 | 18.250000 | -     | 2610  | -    | -    | [75]  |
|             | Swietokrzyskie Lake                   | 52.544444 | 17.598611 | -     | 679   | 214  | -    | EPD   |
|             | Cergowa Gora                          | 49.533333 | 21.700000 | -     | 4355  | -    | -    | [76]  |
|             | Godziszewskie Lake                    | 54.093333 | 18.552778 | -     | 167   | -    | -    | [77]  |
|             | Lake Mikolajki                        | 53.768056 | 21.418056 | -     | 100   | -    | -    | [78]  |
|             | Puscizna Rekowianska                  | 49.483333 | 19.816667 | -     | -     | 203  | -    | [79]  |
| Austria     | Buntes Moor                           | 47.000000 | 11.141667 | -     | 3141  | 1888 | -    | [80]  |
|             | Dortmunder Hütte                      | 47.125095 | 11.003877 | -     | 1375  | -    | -    | [81]  |
|             | Franz Senn-Hütte                      | 47.058366 | 11.167340 | -     | -     | 1073 | -    | [80]  |
|             | Egelsee                               | 47.612500 | 12.170833 | -     | 1912  | 1726 | -    | [82]  |
|             | Gerlos                                | 47.243056 | 12.138889 | -     | -     | 1626 | 571  | [83]  |
|             | Giering                               | 47.471389 | 12.358333 | -     | 751   | -    | -    | [85]  |
|             | Gradenmoos                            | 48.182082 | 12.921333 | -     | -     | 1357 | -    | [86]  |
|             | Grünau Moor                           | 46.984167 | 11.190556 | -     | 1290  | -    | -    | [80]  |
|             | Lindenmoos                            | 47.509722 | 12.043056 | -     | 1803  | 894  | -    | [83]  |
|             | Mieminger See                         | 47.291667 | 10.976389 | -     | -     | 1162 | 332  | [82]  |
|             | Moor Alpenrose                        | 47.050000 | 11.758333 | -     | 2582  | -    | -    | [80]  |
|             | Rotmoos Obergurgl                     | 46.841667 | 11.025000 | -     | 643   | 385  | -    | [83]  |
|             | Schwarzsee Reschenscheideck           | 46.870833 | 10.480556 | -     | 1898  | -    | -    | [84]  |
|             | Schwemm                               | 47.658333 | 12.300000 | -     | -     | 1127 | 684  | [87]  |
|             | Seefelder See                         | 47.323611 | 11.191667 | -     | 11645 | 1862 | 1089 | [82]  |
|             | Zirbenwaldmoor                        | 46.858333 | 11.025000 | -     | 2120  | 446  | -    | [88]  |
|             | Wasenmoos beim Zellhof                | 47.986111 | 13.105556 | -     | 4702  | 698  | 122  | [89]  |
|             | Grosses Überling Schattseit-Moor      | 47.172222 | 13.900000 | -     | 730   | -    | -    | [90]  |
|             | Dürrenecksee-Moor                     | 47.173611 | 13.875000 | -     | 4398  | -    | -    | [90]  |
|             | Fuchsschwanzmoos                      | 47.123611 | 13.905556 | -     | 11267 | -    | -    | [90]  |
|             | Fuschlsee                             | 47.783333 | 13.266667 | -     | -     | 1279 | -    | [91]  |
| Germany     | Ahlenmoor                             | 53.700000 | 8.733333  | -     | 1138  | -    | -    | [92]  |
|             | Ahlequellmoor                         | 51.730556 | 9.509444  | -     | 418   | -    | -    | [93]  |
|             | Bruchberg                             | 51.758889 | 10.460000 | -     | 1027  | -    | -    | [94]  |
|             | Lüttersee                             | 51.576667 | 10.161667 | -     | 1126  | 250  | -    | [95]  |
|             | Silberhohl                            | 51.910000 | 10.182500 | -     | 2738  | -    | -    | [95]  |
|             | Sonnenberger Moor                     | 51.768056 | 10.516111 | -     | 656   | -    | -    | [94]  |
|             | Dunum (Hilliges Moor)                 | 53.583333 | 7.633333  | -     | 651   | -    | -    | [92]  |
|             | Felchensee                            | 53.050000 | 14.133333 | -     | 986   | -    | -    | [96]  |
|             | Großer Krebssee                       | 52.850000 | 14.100000 | -     | 1119  | -    | -    | [96]  |
|             | Löddigsee                             | 53.433333 | 11.850000 | -     | 748   | -    | -    | [97]  |
|             | Wachel 3                              | 53.438889 | 8.868889  | -     | -     | 251  | -    | [98]  |
|             | Brentenlohe                           | 49.787222 | 12.462500 | -     | 2188  | 209  | -    | [99]  |
|             | Bruckmisse                            | 48.732500 | 8.644167  | -     | 3064  | -    | -    | [100] |
|             | Glaswaldsee                           | 48.426667 | 8.249167  | -     | 2273  | 1055 | -    | [100] |
|             | Herrenwiesser see                     | 48.669167 | 8.296389  | -     | 2857  | 1447 | -    | [101] |
|             | Durchenbergried                       | 47.783333 | 8.983333  | -     | 2107  | -    | -    | [102] |
|             | Fauenried                             | 47.750000 | 8.916667  | -     | 10005 | 370  | -    | [102] |
|             | Gaienhofen                            | 47.679444 | 8.975833  | -     | 1269  | -    | -    | [103] |
|             | Hornstaad-Bodensee                    | 47.700000 | 9.016667  | -     | 4190  | 1520 | -    | [102] |
|             | Huzenbacher See                       | 48.574444 | 8.348056  | -     | 2416  | -    | -    | [104] |
|             | Mindelsee                             | 47.755556 | 9.023056  | -     | 2064  | 1852 | -    | [105] |
|             | Oberderdingen-Großvillars             | 49.042500 | 8.760278  | -     | 1270  | -    | -    | [106] |
|             | Steerenmoos                           | 47.800000 | 8.200000  | -     | 3642  | -    | -    | [107] |
|             | Wilder See beim Ruhestein             | 48.569722 | 8.236944  | -     | 1449  | 1074 | -    | [100] |
|             | Wildseemoor bei Kaltenbronn           | 48.719722 | 8.458889  | -     | 5476  | -    | -    | [100] |
| Switzerland | Derrière les Embreux                  | 47.263056 | 7.117222  | -     | -     | 587  | -    | [108] |
|             | Etang de la Gruère                    | 47.240556 | 7.050000  | -     | 2881  | -    | -    | [109] |
|             | Le Loclat                             | 47.020833 | 6.997222  | -     | -     | 2208 | -    | [110] |
|             | Lobsigensee                           | 47.030556 | 7.298056  | 13201 | -     | 2391 | -    | [111] |
|             | Montilier                             | 46.935000 | 7.123611  | 14017 | -     | 2304 | -    | [112] |
|             | Agelsee                               | 46.648611 | 7.543611  | -     | 134   | -    | -    | [113] |
|             | Amsoldingersee                        | 46.722778 | 7.576944  | -     | 1438  | -    | -    | EPD   |
|             | Bachalpsee                            | 46.669444 | 8.020833  | -     | 1754  | 1225 | -    | [114] |
|             | Hinterburgseeli                       | 46.718889 | 8.068889  | -     | 2097  | 1706 | -    | [84]  |
|             | Hängstli                              | 46.794167 | 7.833056  | -     | 1619  | -    | -    | [115] |
|             | Linden                                | 46.850833 | 7.686111  | -     | 2657  | 971  | -    | [84]  |
|             | Oberaar                               | 46.547222 | 8.255556  | -     | 1030  | -    | -    | [116] |
|             | Rotsee                                | 47.075833 | 8.325833  | -     | 2603  | 1863 | -    | [113] |
|             | Schwarzsee FR                         | 46.670278 | 7.268056  | -     | 2195  | 557  | -    | [117] |
|             | Schöpfenwaldmoor                      | 46.743611 | 7.847778  | -     | 1043  | 412  | -    | [118] |
|             | Sägistalsee                           | 46.681389 | 7.977500  | -     | 1886  | 1121 | -    | [118] |
|             | Süftenenegg                           | 46.734444 | 7.398889  | -     | 1882  | 500  | -    | [119] |
|             | Trogenmoos                            | 46.761944 | 7.863889  | -     | 500   | 444  | -    | [118] |
|             | Aletschwald                           | 46.389722 | 8.025556  | -     | 5117  | 1563 | -    | [84]  |
|             | Alp Lüsga Belalp 1                    | 46.230833 | 7.590278  | -     | 1321  | -    | -    | [84]  |
|             | Alpi di Robièi Val Bavona             | 46.445000 | 8.518333  | -     | 647   | 355  | -    | [84]  |
|             | Alpi di Robièi Val Bavona Bodenprofil | 46.445000 | 8.518056  | -     | 2000  | -    | -    | [119] |

|        |                                |           |           |        |       |      |      |       |
|--------|--------------------------------|-----------|-----------|--------|-------|------|------|-------|
|        | Bitsch-Naters                  | 46.341111 | 7.991667  | -      | 1928  | 1767 | -    | [84]  |
|        | Eggen ob Blatten               | 46.371944 | 7.990556  | -      | 7339  | 1108 | -    | [84]  |
|        | Etang d'y Cor Montana          | 46.311667 | 7.479167  | 14763  | 2139  | 1585 | -    | [84]  |
|        | Etang de Luissel Bex           | 46.237222 | 7.017500  | -      | 6543  | 2285 | -    | [119] |
|        | Gondo Alpen                    | 46.211667 | 8.113333  | -      | 4396  | 1449 | -    | [84]  |
|        | Greicheralp Riederalp          | 46.379722 | 8.030278  | -      | 3659  | 3341 | -    | [84]  |
|        | Grächen See                    | 46.195556 | 7.845000  | -      | 2337  | 1471 | 815  | [119] |
|        | Hopschensee                    | 46.252500 | 8.023056  | -      | -     | 2336 | -    | [84]  |
|        | Lac du Mont d'Orge Sion        | 46.234444 | 7.341389  | 12511  | 10399 | 2647 | -    | [84]  |
|        | Mittlere Hellelen              | 46.283056 | 7.844167  | -      | 3344  | 1508 | -    | [84]  |
|        | Pillon Gsteig-Diablerets       | 46.359722 | 7.198611  | -      | 3084  | 1226 | -    | [84]  |
|        | Simplon-Gampisch-Alter Spittel | 46.231111 | 8.011389  | -      | 2747  | -    | -    | [84]  |
|        | Wallbach Lenk                  | 46.428333 | 7.403056  | -      | 1483  | 1483 | 0    | [84]  |
|        | Mont Roux                      | 46.468056 | 6.150000  | 13373  | -     | 1381 | -    | [120] |
|        | Gamperfin                      | 47.171389 | 9.381111  | -      | 1424  | -    | -    | [121] |
|        | Creux de Croue                 | 46.500000 | 6.128333  | -      | -     | 1554 | 1146 | [84]  |
|        | Motta Naluns                   | 46.810833 | 10.264722 | -      | 2017  | -    | -    | [118] |
|        | Praz Rodet                     | 46.566667 | 6.173611  | -      | 2249  | 427  | -    | [108] |
| Italy  | Bondone                        | 46.014444 | 11.045833 | -      | -     | 3931 | -    | [124] |
|        | Dura-Moor                      | 46.640000 | 11.458889 | -      | 2336  | 1551 | -    | [125] |
|        | MalschötscherHotter            | 46.666111 | 11.458333 | -      | -     | 2308 | -    | [125] |
|        | Rinderplatz                    | 46.644722 | 11.494444 | -      | 1477  | 1197 | -    | [125] |
|        | Schwarzsee                     | 46.666389 | 11.431944 | -      | 2508  | 1792 | -    | [125] |
|        | Sommerstüss                    | 46.760833 | 11.678333 | -      | 2634  | 1183 | -    | [125] |
|        | Grunsee                        | 46.862778 | 10.478056 | -      | 7691  | -    | -    | [122] |
|        | DossaccioBormio                | 46.470556 | 10.337222 | -      | -     | 1835 | -    | [84]  |
|        | Lac de Lod                     | 45.802500 | 7.609722  | -      | -     | 1182 | -    | [126] |
|        | Lac de Villa                   | 45.684722 | 7.761111  | -      | -     | 2262 | -    | [126] |
|        | Lac du Verney-Dessus           | 45.693333 | 6.872500  | -      | 2156  | -    | -    | [127] |
|        | Torveraz                       | 45.695278 | 6.860556  | -      | 2366  | -    | -    | [127] |
|        | Tourbière de Pilaz             | 45.816944 | 7.833333  | -      | -     | 9756 | -    | [126] |
|        | Tourbière de Santa Anna        | 45.858333 | 7.654167  | -      | 793   | -    | -    | [126] |
|        | Laghi dell'Orgials             | 44.233333 | 7.133333  | -      | 1802  | -    | -    | [128] |
|        | Lago Grande di Avigliana       | 45.065000 | 7.386667  | -      | -     | 122  | -    | [129] |
|        | Lago Piccolo di Avigliana      | 45.053333 | 7.384167  | -      | -     | 2203 | -    | [129] |
|        | Ortasee                        | 45.816667 | 8.400000  | -      | 7329  | -    | -    | [130] |
|        | OrtaseeII                      | 45.816670 | 8.400000  | -      | 2175  | 1925 | -    | [130] |
|        | Refugio Mondovi                | 44.380960 | 7.821145  | -      | -     | 1758 | -    | [128] |
|        | Selle di Carmino               | 44.150000 | 7.694444  | 11923  | 11923 | 970  | -    | [131] |
|        | Torbiera del Biecai            | 44.200000 | 7.700000  | -      | 5507  | 3287 | -    | [128] |
|        | Lago della Costa               | 45.231274 | 11.737721 | -      | -     | 6300 | -    | [132] |
|        | Lago Padule                    | 44.298611 | 10.214722 | -      | 1680  | 0    | -    | [133] |
|        | Lago dell'Accesa               | 42.986667 | 10.891667 | -      | 8437  | 3146 | -    | [134] |
|        | Colfiorito                     | 43.025000 | 12.925000 | -      | 3913  | 1998 | 472  | [135] |
|        | Lago Pratignano                | 44.176111 | 10.819722 | -      | 3542  | -    | -    | EPD   |
|        | Ospitale                       | 44.146513 | 10.786631 | -      | 1303  | -    | -    | EPD   |
|        | Pavullo                        | 44.318333 | 10.837500 | -      | 4200  | 1000 | -    | [136] |
|        | Parma                          | 44.711209 | 10.312795 | -      | 2000  | -    | -    | [137] |
|        | Lago di Martignano             | 42.116667 | 12.333333 | -      | 11498 | 6560 | 2814 | [138] |
|        | Lago di Vico                   | 42.324823 | 12.182378 | -      | -     | 2630 | -    | [112] |
|        | Lago Albano                    | 41.750000 | 12.666667 | -      | 8402  | 3400 | -    | [139] |
|        | Lago di Nemi                   | 41.712222 | 12.702500 | -      | 11300 | 2700 | -    | [139] |
|        | Central Adriatic Sea           | 42.666944 | 15.667500 | -      | 6400  | 2032 | -    | [139] |
|        | Salerno Bay                    | 40.472778 | 14.706667 | 20000  | 4200  | -    | -    | [140] |
|        | Lago Grande di Monticchio      | 40.944444 | 15.600000 | 132000 | 2520  | 1852 | -    | [141] |
|        | BradanoValley                  | 40.652161 | 16.592063 | -      | -     | 2250 | 2000 | [142] |
| France | Aronde                         | 49.462500 | 2.691111  | -      | 2216  | -    | -    | EPD   |
|        | Auneau                         | 48.456111 | 1.793611  | -      | 1101  | -    | -    | EPD   |
|        | Baie de Seine estuary          | 49.416667 | -0.033333 | -      | -     | 1759 | -    | [143] |
|        | Change-Glatinier               | 48.116667 | -0.788889 | -      | 1941  | 822  | 152  | [144] |
|        | Coulvain                       | 49.066667 | -0.716667 | -      | 1052  | -    | -    | EPD   |
|        | Fougères                       | 48.516667 | -0.833333 | -      | 634   | -    | -    | [145] |
|        | La Verderie                    | 48.350000 | -0.427778 | -      | 1370  | 876  | -    | [144] |
|        | La Vie                         | 48.548333 | -0.258333 | 13390  | 2952  | -    | -    | [144] |
|        | Lavaré                         | 48.433333 | -0.916667 | -      | 1389  | -    | -    | [144] |
|        | Le Fourneau                    | 48.444444 | -0.191667 | 17204  | 5535  | -    | -    | [144] |
|        | Lingreville                    | 48.929722 | -1.543056 | -      | 2696  | 507  | -    | [146] |
|        | Malingue                       | 48.438889 | -0.575000 | -      | 1823  | 1765 | -    | [144] |
|        | Marais de Kerdual              | 47.586667 | -3.051667 | -      | 3725  | -    | -    | [147] |
|        | Marais de Lisle                | 47.429722 | -1.494444 | -      | 5147  | 694  | -    | [148] |
|        | Marais de Marchesieux          | 49.173333 | -1.300000 | -      | 2768  | -    | -    | [149] |
|        | Mobeche Forest                 | 48.516667 | -1.000000 | -      | 891   | -    | -    | [145] |
|        | Moulin de Thévalles            | 47.969444 | -0.416389 | -      | 912   | 769  | -    | [150] |
|        | Pezou                          | 47.870833 | 1.150833  | -      | 2092  | 825  | 37   | [151] |
|        | Rimarde                        | 48.100556 | 2.310000  | -      | 2191  | 1180 | 783  | [152] |

|                                     |           |           |   |       |      |      |        |
|-------------------------------------|-----------|-----------|---|-------|------|------|--------|
| Saint-Ursin                         | 48.519444 | -0.253333 | - | 2250  | -    | -    | [144]  |
| Serrent                             | 47.809444 | -2.468056 | - | 566   | -    | -    | EPD    |
| Altenweiher                         | 48.013333 | 6.994444  | - | 4288  | 2632 | -    | [153]  |
| Bellefontaine                       | 46.575278 | 6.093056  | - | 8364  | -    | -    | [123]  |
| Grozon                              | 46.890556 | 5.700278  | - | 2708  | 1594 | -    | [154]  |
| Hières sur Amby                     | 45.790833 | 5.283333  | - | 3059  | -    | -    | [155]  |
| Lac Cerin                           | 45.777222 | 5.561944  | - | -     | 1760 | -    | [156]  |
| Lac de Clairvaux                    | 46.565000 | 5.749167  | - | 904   | 666  | -    | [154]  |
| Lac de Malpas                       | 46.833889 | 6.293889  | - | 1605  | 944  | 378  | [154]  |
| Lake of Annecy                      | 45.856667 | 6.172222  | - | 2460  | 1966 | -    | [157]  |
| Loras                               | 45.666389 | 5.243333  | - | 2834  | 2078 | -    | [155]  |
| Lutinière                           | 46.444444 | 6.411059  | - | 1837  | 974  | -    | EPD    |
| Moselotte                           | 48.031944 | 7.000000  | - | 1609  | 790  | 244  | [153]  |
| Tourbière de Narbief                | 47.080278 | 6.697500  | - | 2840  | 1541 | 836  | [154]  |
| col du Petit Saint Bernard          | 45.671944 | 6.875556  | - | 1800  | 1146 | 491  | [158]  |
| Etang du Lautrey                    | 46.587222 | 5.863889  | - | 11740 | -    | -    | [123]. |
| La Beuffarde                        | 46.823611 | 6.423056  | - | 1861  | 1487 | 12   | [127]  |
| Le Grand Lemps                      | 45.473333 | 5.416667  | - | -     | 2085 | -    | [154]  |
| Tourbière de Censeau                | 46.813889 | 6.055278  | - | 1454  | 527  | 225  | [155]  |
| Tourbière du Mou de Pleure          | 46.913889 | 5.450556  | - | 1401  | 594  | 298  | [154]  |
| Tourbières des Granges des Chavants | 45.893056 | 6.768333  | - | 10581 | 913  | -    | [154]  |
| Ampoix                              | 45.633333 | 2.933333  | - | 5530  | -    | -    | [159]  |
| Champ Gazon                         | 47.203333 | 4.048611  | - | 3781  | 707  | -    | [160]  |
| Etang Bouquin                       | 47.273611 | 4.018611  | - | 2029  | 878  | -    | [161]  |
| Etang de Cheylade                   | 45.090000 | 2.895000  | - | -     | 2647 | 1727 | [161]  |
| Etang de la Villetelle              | 46.023889 | 1.707778  | - | 1447  | 1048 | -    | [162]  |
| La Taphanel                         | 45.274444 | 2.679167  | - | 2394  | -    | -    | [163]  |
| Lac du Bouchet                      | 44.916667 | 3.783333  | - | -     | 792  | -    | [164]  |
| Lac du Mont de Belier               | 45.337778 | 2.643056  | - | 3381  | -    | -    | [165]  |
| Le Grand Montarnu                   | 47.011944 | 4.050000  | - | -     | 881  | -    | [164]  |
| Le Jolan                            | 45.139444 | 2.859167  | - | -     | 881  | -    | [161]  |
| Le Miroir                           | 46.539444 | 5.326667  | - | 805   | -    | -    | [164]  |
| Les Cars                            | 45.607500 | 2.375000  | - | 588   | -    | -    | [166]  |
| Les Chaux de Coudert                | 45.274444 | 1.946389  | - | -     | 2073 | -    | [163]  |
| Les Nans                            | 46.789722 | 5.974444  | - | -     | 1346 | -    | [163]  |
| Marais de Maurepas                  | 48.102222 | 2.582778  | - | 1713  | 823  | -    | [154]  |
| Marais du Grang Chaumet             | 46.937500 | 1.891389  | - | 9097  | 3828 | -    | [152]  |
| Mars                                | 45.305278 | 1.836111  | - | 1575  | 598  | -    | [167]  |
| Montbé                              | 47.214722 | 4.106944  | - | 1533  | 740  | 211  | [168]  |
| Moulin de Prugnolas                 | 45.849722 | 1.645833  | - | 3421  | -    | -    | [161]  |
| Nataloup                            | 47.227500 | 4.035278  | - | 1171  | 354  | -    | [169]  |
| Peyre peat-bog                      | 44.960278 | 2.718889  | - | -     | 1428 | 300  | [161]  |
| Port des Lamberts                   | 46.960833 | 4.010556  | - | 2402  | 1175 | -    | [170]  |
| Quart du Bois                       | 46.892500 | 4.034167  | - | 1249  | 455  | -    | [171]  |
| Saint-Benoit-sur-Loire              | 47.810278 | 2.319167  | - | 2348  | 2107 | -    | [161]  |
| Sources de l'Yonne                  | 46.956389 | 4.010000  | - | 1600  | 709  | 69   | [172]  |
| Tourbière de Longeyroux             | 45.601944 | 2.102500  | - | 1745  | -    | -    | [161]  |
| Tourbière de Roussy                 | 45.076111 | 2.517500  | - | 9466  | 1298 | -    | [168]  |
| Tourbière des Dauges                | 46.012500 | 1.416667  | - | -     | 1801 | 466  | [173]  |
| La Baforière                        | 46.485019 | -0.305556 | - | -     | 2254 | -    | [144]  |
| Tourbière de Chabannes              | 45.649167 | 2.310556  | - | -     | 1432 | 216  | [173]  |
| Font Carluze                        | 45.540833 | 2.344444  | - | 1137  | -    | -    | [174]  |
| Ancenis                             | 47.382500 | -1.165000 | - | 5581  | -    | -    | [175]  |
| Basse-Ville                         | 47.186111 | -1.858056 | - | 771   | 514  | -    | [176]  |
| Bois-Jésus                          | 47.413333 | 0.638056  | - | 1082  | -    | -    | [177]  |
| Carquefou                           | 47.309167 | -1.476944 | - | 1642  | 379  | -    | [179]  |
| Caves d'Amont                       | 47.326667 | 0.475278  | - | 8535  | 713  | 581  | [180]  |
| Changeon                            | 47.276111 | 0.131944  | - | -     | 1178 | -    | [175]  |
| Cinq-Mars-la-Pile                   | 47.337778 | 0.451111  | - | 8979  | 2286 | 420  | [180]  |
| Cordemais                           | 47.280833 | -1.876111 | - | 1789  | 1328 | -    | [181]  |
| Corniche de Pail                    | 48.416667 | -0.211111 | - | -     | 1488 | -    | [144]  |
| Ecours                              | 47.382500 | -1.165000 | - | 7970  | -    | -    | [158]  |
| Jaunay                              | 46.662778 | -1.892222 | - | 8636  | 166  | -    | [158]  |
| La Bergerie en Charron              | 46.301111 | -1.043889 | - | 2723  | 1400 | 1228 | [182]  |
| La Caudelais                        | 47.261111 | -1.780556 | - | 6268  | 1836 | -    | [176]  |
| La Grande Brousse                   | 47.486667 | 0.674167  | - | 3252  | -    | -    | [175]  |
| La Grange                           | 46.089722 | -0.775278 | - | 5803  | -    | -    | [158]  |
| La Prairie du Cassoir               | 47.256667 | 0.147500  | - | 1882  | 828  | 652  | [178]  |
| La boire Torse                      | 47.386667 | -1.070000 | - | 5704  | 1640 | -    | [183]  |
| Le Gesvres                          | 47.272222 | -1.595833 | - | 6556  | 703  | -    | [184]  |
| Le Marais de la Perge               | 45.382500 | -1.115000 | - | 1169  | -    | -    | [185]  |
| Les Naudières                       | 47.537500 | 0.702222  | - | 1308  | -    | -    | [186]  |
| Logne                               | 47.328333 | -1.501111 | - | 3098  | -    | -    | EPD    |
| Marais de Champtocé                 | 47.413611 | -0.860556 | - | 2560  | 908  | -    | [175]  |
| Marais de Mazerolles                | 47.358056 | -1.478611 | - | 1420  | 699  | -    | [184]  |

|          |                                |           |           |         |       |      |      |       |
|----------|--------------------------------|-----------|-----------|---------|-------|------|------|-------|
|          | Marais de Munet                | 47.221667 | -0.095833 | -       | 1162  | 579  | -    | [175] |
|          | Marais de Méron                | 47.380556 | -1.123333 | -       | 5574  | 803  | -    | [184] |
|          | Marais de la Poupinière        | 47.402778 | -1.502778 | -       | 938   | -    | -    | [158] |
|          | Marais des Bourbes             | 46.550000 | -1.816667 | -       | 2601  | 296  | 131  | [184] |
|          | Oudon                          | 47.355556 | -1.293611 | -       | 2210  | 1298 | 145  | [187] |
|          | Pas du Gu                      | 47.238333 | -2.150000 | -       | 1079  | -    | -    | [188] |
|          | Petit Marais                   | 47.217222 | -2.102222 | -       | 2766  | -    | -    | [158] |
|          | Petit Rocher                   | 46.663056 | -1.915556 | -       | 6969  | -    | -    | [158] |
|          | Riabelais                      | 47.402500 | 0.648333  | -       | 1710  | -    | -    | [187] |
|          | Saint Viaud Contin             | 47.265000 | -2.016667 | -       | 1546  | -    | -    | [148] |
|          | Tourbière de Nay               | 47.310556 | -1.534167 | -       | 1367  | 751  | 459  | [189] |
|          | Tourbière de Parcay-sur-Vienne | 47.092222 | 0.480556  | -       | 9334  | -    | -    | [131] |
|          | Vertonne                       | 46.549722 | -1.764722 | -       | 2970  | 1043 | -    | [190] |
|          | Clapeyret                      | 44.147222 | 7.238889  | -       | 3059  | -    | -    | [131] |
|          | Col Luitel                     | 45.088333 | 5.849722  | -       | -     | 2544 | -    | [191] |
|          | Col des Lauzes                 | 44.767500 | 6.536944  | -       | 6036  | 2561 | -    | [192] |
|          | Correo                         | 44.508333 | 5.983056  | -       | 1871  | -    | -    | [193] |
|          | Embouchac                      | 43.566389 | 3.916667  | -       | 6556  | -    | -    | [194] |
|          | Etang d'Ouveillan              | 43.266667 | 3.000000  | -       | 3972  | -    | -    | [155] |
|          | Fangeas                        | 47.355556 | -1.293611 | -       | 1195  | 1079 | -    | [131] |
|          | Grand Ratz le Pellet           | 45.425000 | 5.608333  | -       | 1295  | 1022 | -    | [191] |
|          | Lac Long Inférieur             | 44.057778 | 7.450000  | -       | 2955  | -    | -    | EPD   |
|          | Lac Miroir                     | 44.635278 | 6.793889  | -       | 3848  | -    | -    | [191] |
|          | Lac Saint Léger                | 44.420000 | 6.336389  | -       | 4861  | 1234 | -    | [191] |
|          | Lac de Praver                  | 45.073611 | 5.856389  | -       | 5207  | 2003 | -    | [195] |
|          | Lac des Boites                 | 45.056111 | 5.885278  | -       | -     | 2729 | -    | [154] |
|          | Lac du Lauzon                  | 44.675278 | 5.793333  | -       | 6698  | 2164 | 1572 | [191] |
|          | Lake Racou                     | 42.554167 | 2.008333  | -       | -     | 1260 | -    | EPD   |
|          | Lignin Lake                    | 44.104167 | 6.708611  | -       | 7864  | 7545 | -    | [178] |
|          | Marais de Charauze             | 45.368333 | 5.566944  | -       | 870   | 777  | -    | [131] |
|          | Pelléautier                    | 44.522222 | 6.183333  | -       | 987   | 688  | -    | [191] |
|          | Peuil Peat Bog                 | 45.125000 | 5.643611  | -       | 6679  | -    | -    | [196] |
|          | Pré Rond                       | 44.918889 | 6.594167  | -       | 602   | 201  | -    | [131] |
|          | Sabbion                        | 44.130000 | 7.473333  | -       | 2979  | -    | -    | [164] |
|          | Saint Hilaire du Rosier        | 45.070833 | 5.256667  | -       | 2234  | -    | -    | [155] |
|          | Saint Julien de Ratz           | 45.348333 | 5.655278  | -       | -     | 4637 | -    | [155] |
|          | Saint Sixte                    | 45.425833 | 5.628611  | -       | 5600  | 1765 | -    | [173] |
|          | Tourbière de Gatimort          | 43.575278 | 2.785556  | 12595   | 1328  | 851  | -    | [191] |
|          | Tourbière de Mont Sec          | 45.068889 | 5.806667  | -       | 11114 | 698  | -    | [191] |
|          | Tourbière de Raux              | 44.503333 | 5.935278  | -       | 1984  | 1332 | 245  | [197] |
|          | Tourbière de la Lande          | 43.566667 | 2.966667  | -       | 1164  | 835  | -    | [197] |
|          | Tourbière des Narses Mortes    | 44.433333 | 3.600000  | -       | 1823  | -    | -    | [198] |
|          | Tourbière du Peschio           | 44.450000 | 3.600000  | -       | 976   | 698  | -    | [197] |
| Spain    | Albufera Alcudia               | 39.792778 | 3.119167  | -       | 2617  | -    | -    | [199] |
|          | Algendar                       | 39.940556 | 3.958611  | -       | 6350  | -    | -    | [200] |
|          | Cala Galdana                   | 39.936944 | 3.965000  | -       | 2119  | -    | -    | [201] |
|          | Cala'n Porter                  | 39.870556 | 4.131389  | -       | 4450  | -    | -    | [200] |
|          | Antas                          | 37.208333 | -1.823611 | -       | 8029  | -    | -    | [202] |
|          | Bajondillo                     | 36.619722 | -4.496389 | -       | -     | -    | -    | [203] |
|          | Delta del Rio Besos            | 41.380278 | 2.248333  | 134950  | 902   | -    | -    | [204] |
|          | El Pirulejo                    | 37.438889 | -4.195000 | 15000   | -     | -    | -    | [205] |
|          | Laguna Salada Chiprana         | 41.233333 | -0.166667 | -       | -     | 1788 | 857  | EPD   |
|          | Navarrés                       | 39.100000 | -0.683333 | -       | 4149  | -    | -    | [206] |
|          | Carihuela Cave                 | 37.139183 | -3.596765 | 0.12 Ma | -     | -    | -    | [207] |
|          | Cueva Perneras                 | 37.535556 | -1.430000 | 12000   | -     | -    | -    | [208] |
|          | Atxuri                         | 43.250000 | -1.550000 | -       | 811   | -    | -    | [209] |
|          | Cueto de la Avellanosa         | 43.116667 | -4.364167 | -       | -     | 2231 | -    | [210] |
|          | Lago de Ajo                    | 43.050000 | -6.150000 | -       | 3948  | 2871 | -    | [211] |
|          | Laguna de la Roya              | 42.216667 | -6.766667 | -       | 1751  | 884  | -    | [211] |
|          | PRD-4                          | 42.533333 | -8.516667 | -       | 11499 | -    | -    | [212] |
|          | Posidonia Lligat               | 42.292222 | -3.291111 | -       | 658   | -    | -    | [213] |
|          | Puerto de Los Tornos           | 43.150000 | -3.433333 | -       | 1323  | 991  | -    | [214] |
|          | Saldropo                       | 43.050000 | -2.716667 | -       | 999   | 893  | -    | [209] |
|          | Sanabria Marsh                 | 42.100000 | -6.733333 | -       | 8721  | -    | -    | [211] |
|          | El Payo                        | 40.253333 | -6.771111 | -       | 2598  | -    | -    | [215] |
|          | Lanzahíta                      | 40.222222 | -4.935833 | -       | -     | 2434 | -    | [205] |
|          | Patateros bog                  | 39.597222 | -4.674167 | -       | 1064  | -    | -    | [216] |
|          | Peña Negra                     | 40.334722 | -5.792222 | -       | 4077  | 1011 | -    | [217] |
|          | Puerto de Serranillos          | 40.307222 | -4.934167 | -       | 247   | -    | -    | [218] |
|          | Quintanar de la Sierra         | 42.033333 | -3.016667 | -       | 2632  | -    | -    | [209] |
|          | Salada Pequeña                 | 41.033333 | -0.216667 | -       | 2727  | -    | -    | EPD   |
|          | Turbera de La Panera Cabras    | 40.165833 | -5.758056 | -       | 124   | -    | -    | [215] |
| Portugal | Charco da Candieira            | 40.341667 | -7.576389 | -       | 1410  | -    | -    | [219] |
|          | Lagoa Comprida 2               | 40.362778 | -7.636111 | -       | 7734  | -    | -    | [220] |
|          | Lagoa Travessa I               | 38.304444 | -8.772500 | -       | 6239  | -    | -    | [221] |

|         |                  |           |           |        |       |      |      |       |
|---------|------------------|-----------|-----------|--------|-------|------|------|-------|
| Syria   | Bouara           | 35.233333 | 41.183333 | -      | 2990  | -    | -    | [222] |
|         | Ghab             | 35.683333 | 36.300000 | 62850  | 11250 | -    | -    | [223] |
| Israel  | Dead Sea-Ze'elim | 31.333333 | 35.500000 | -      | -     | 2344 | 1300 | [224] |
|         | Birkat Ram       | 33.250000 | 35.666667 | -      | 6840  | 2586 | -    | [225] |
|         | Lake Kinneret    | 32.768712 | 35.592129 | -      | 2350  | -    | -    | [226] |
|         | Hula Valley      | 33.085768 | 35.610141 | 115000 | 5000  | -    | -    | [227] |
| Iran    | Gomishan         | 37.151667 | 54.056667 | -      | 2414  | -    | -    | [228] |
|         | Lake Almalou     | 37.665278 | 46.631944 | -      | 2026  | 1701 | -    | [229] |
|         | Lake Urmia       | 37.793611 | 45.375833 | 200405 | 8632  | 3966 | -    | [230] |
|         | Lake Zeribar     | 35.533333 | 46.116667 | -      | 3214  | -    | -    | EPD   |
|         | Maharlou Lake    | 29.477222 | 52.759722 | -      | 4105  | 2964 | -    | [229] |
| Iraq    | Shanidar Cave    | 36.611914 | 44.194742 | 46000  | -     | -    | -    | [231] |
| Georgia | Adange           | 43.305556 | 41.333333 | -      | 3945  | -    | -    | [232] |
|         | Amtkel           | 43.283333 | 41.291667 | -      | 2295  | -    | -    | [232] |
|         | Gagra            | 43.283333 | 40.266667 | -      | 5754  | -    | -    | [233] |
|         | Khodzal          | 42.954167 | 41.911111 | -      | 441   | -    | -    | [232] |
|         | Lagodekhi        | 41.914444 | 46.373611 | -      | 73    | -    | -    | [234] |
|         | Sibista          | 43.233333 | 41.430556 | -      | 1633  | -    | -    | [232] |
|         | Dzudzuana Cave   | 42.500000 | 43.516667 | 24000  | -     | -    | -    | [235] |
|         | Dmanisi          | 41.316667 | 44.350000 | 1.7 Ma | -     | -    | -    | [236] |
|         | Akhali Ateni     | 43.000000 | 40.983333 | -      | 6300  | -    | -    | [237] |
|         | Supsa River      | 42.009167 | 41.860278 | -      | 1260  | -    | -    | [237] |
|         | Lake Bazaleti    | 42.039000 | 44.678000 | -      | -     | 2570 | -    | [237] |
|         | Imera lake       | 41.591389 | 44.086944 | -      | -     | 2360 | -    | [237] |
| Albania | Lake Maliq       | 40.766666 | 20.783333 | 3611   | -     | -    | -    | [238] |
|         | Lake Ohrid       | 40.900000 | 20.800000 | 170000 | -     | -    | -    | [239] |

(b)

| Interval Time     | Country        | Site name          | Classified <sup>b</sup> |
|-------------------|----------------|--------------------|-------------------------|
| 1700-11.923 Ka BP | Turkey         | Abant Gölü         | Not recorded            |
|                   |                | Yeniçaga Gölü      | Not recorded            |
|                   |                | Göhlisar Gölü I    | Not recorded            |
|                   |                | Kararmik Batakligi | Early presence          |
|                   |                | Pınarbasi          | Early presence          |
|                   |                | Söğütlü Gölü       | Early presence          |
|                   |                | Ladik Gölü         | Not recorded            |
|                   | Greece         | Orestias           | not recorded            |
|                   |                | Ioannina I         | Early presence          |
|                   |                | Ioannina II        | Not recorded            |
|                   |                | Xinias             | Not recorded            |
|                   |                | Myrtoon basin      | Early presence          |
|                   | Bulgary        | Beliya Kanton      | Early presence          |
|                   |                | Kupena I           | Not recorded            |
|                   |                | Kupena II          | Not recorded            |
|                   |                | Black Sea South    | Not recorded            |
|                   |                | Varna II           | Not recorded            |
|                   | Romania        | Avrig I            | Not recorded            |
|                   |                | Mohos              | Not recorded            |
|                   |                | Luci               | Not recorded            |
|                   |                | Bisoca             | Not recorded            |
|                   |                | Steregoiu          | Not recorded            |
|                   | Hungary        | Alsópáhok          | Not recorded            |
|                   |                | Balaton Centre     | Not recorded            |
|                   |                | Balaton Southwest  | Not recorded            |
|                   |                | Nagy-Mohos         | Not recorded            |
|                   |                | Pötréte            | Not recorded            |
|                   |                | Szigliget          | Not recorded            |
|                   | Czech Republic | Vracov             | Not recorded            |
|                   |                | Borkovicka blata   | Not recorded            |
|                   |                | Chrát              | Not recorded            |
|                   |                | Velka niva         | Not recorded            |
|                   |                | Stráženská slat    | Not recorded            |
|                   | Poland         | Bledowo Lake       | Not recorded            |
|                   |                | Lake Gosciadz      | Not recorded            |
|                   |                | Lake Mikolajki     | Not recorded            |
|                   | Austria        | Egelsee            | Not recorded            |
|                   |                | Gerlos             | Not recorded            |
|                   |                | Giering            | Not recorded            |
|                   |                | Lindenmoos         | Not recorded            |
|                   |                | Mieminger See      | Not recorded            |
|                   |                | Moor Alpenrose     | Not recorded            |

|             |                                     |                |
|-------------|-------------------------------------|----------------|
|             | Schwarzsee Reschenscheideck         | Not recorded   |
|             | Schwemm                             | Not recorded   |
|             | Seefelder See                       | Not recorded   |
|             | Grosses Überling Schattseit-Moor    | Not recorded   |
|             | Fuchsschwanzmoos                    | Not recorded   |
| Germany     | Fuschlsee                           | Not recorded   |
|             | Lüttersee                           | Not recorded   |
|             | Löddigsee                           | Not recorded   |
|             | Brentenlohe                         | Not recorded   |
|             | Durchenbergried                     | Not recorded   |
|             | Feuenried                           | Not recorded   |
|             | Hornstaad-Bodensee                  | Not recorded   |
| Switzerland | Etang de la Gruère                  | Not recorded   |
|             | Le Loclat                           | Not recorded   |
|             | Lobsigensee                         | Early presence |
|             | Montilier                           | Early presence |
|             | Aegelsee                            | Not recorded   |
|             | Amsoldingensee                      | Not recorded   |
|             | Bachalpsee                          | Not recorded   |
|             | Hinterburgseeli                     | Not recorded   |
|             | Linden                              | Not recorded   |
|             | Etang d'y Cor Montana               | Early presence |
|             | Hopschensee                         | Not recorded   |
|             | Lac du Mont d'Orge Sion             | Early presence |
|             | Mittlere Hellelen                   | Not recorded   |
|             | Pillon Gsteig-Diablerets            | Not recorded   |
|             | Wallbach Lenk                       | Not recorded   |
|             | Mont Roux                           | Early presence |
|             | Motta Naluns                        | Not recorded   |
|             | Praz Rodet                          | Not recorded   |
| Italy       | Bondone                             | Not recorded   |
|             | Dura-Moor                           | Not recorded   |
|             | Malschötscher Hotter                | Not recorded   |
|             | Rinderplatz                         | Not recorded   |
|             | Sommersüss                          | Not recorded   |
|             | Grunsee                             | Not recorded   |
|             | Dossaccio Bormio                    | Not recorded   |
|             | Lac de Villa                        | Not recorded   |
|             | Laghi dell'Orgials                  | Not recorded   |
|             | Lago Piccolo di Avigliana           | Not recorded   |
|             | Ortasee                             | Not recorded   |
|             | Refugio Mondovi                     | Not recorded   |
|             | Selle di Carnino                    | Early presence |
|             | Torbiera del Biecai                 | Not recorded   |
|             | Lago della Costa                    | Not recorded   |
|             | Lago dell'Accesa                    | Not recorded   |
|             | Colfiorito                          | Not recorded   |
|             | Lago di Vico                        | Not recorded   |
|             | Lago Albano                         | Not recorded   |
|             | Salerno Bay                         | Early presence |
|             | Lago Grande di Monticchio LGM       | Early presence |
| France      | La Vie                              | Early presence |
|             | Le Fourneau                         | Early presence |
|             | Pezou                               | Not recorded   |
|             | Saint-Ursin                         | Not recorded   |
|             | Altenweiher                         | Not recorded   |
|             | Bellefontaine                       | Not recorded   |
|             | Hières sur Amby                     | Not recorded   |
|             | Loras                               | Not recorded   |
|             | Etang du Lautrey                    | Not recorded   |
|             | Tourbières des Granges des Chavants | Not recorded   |
|             | Champ Gazon                         | Not recorded   |
|             | Etang de Cheylade                   | Not recorded   |
|             | Lac du Bouchet                      | Not recorded   |
|             | Le Miroir                           | Not recorded   |
|             | Marais du Grang Chaumet             | Not recorded   |
|             | Nataloup                            | Not recorded   |
|             | Peyre peat-bog                      | Not recorded   |
|             | Saint-Benoit-sur-Loire              | Not recorded   |
|             | Tourbière des Dauges                | Not recorded   |
|             | La Grande Brousse                   | Not recorded   |
|             | Marais de Munet                     | Not recorded   |
|             | Marais de la Poupinière             | Not recorded   |
|             | Tourbière de Parçay-sur-Vienne      | Not recorded   |
|             | Col des Lauzes                      | Not recorded   |
|             | Correo                              | Not recorded   |



|                |                         |                |
|----------------|-------------------------|----------------|
|                | Grand Ratz le Pellet    | Not recorded   |
|                | Lac Long Inférieur      | Not recorded   |
|                | Lac des Boites          | Not recorded   |
|                | Lake Racou              | Not recorded   |
|                | Peuil Peat Bog          | Not recorded   |
|                | Saint Hilaire du Rosier | Not recorded   |
|                | Saint Julien de Ratz    | Not recorded   |
|                | Tourbière de Gatimort   | Early presence |
|                | Tourbière de Mont Sec   | Not recorded   |
| Spain          | Bajondillo              | Early presence |
|                | El Pirulejo             | Early presence |
|                | Navarrés                | Not recorded   |
|                | Carihuela Cave          | Early presence |
|                | Cueva Perneras          | Early presence |
|                | Lago de Ajo             | Not recorded   |
|                | Laguna de la Roya       | Not recorded   |
|                | PRD-4                   | Not recorded   |
|                | Sanabria Marsh          | Not recorded   |
|                | Quintanar de la Sierra  | Not recorded   |
| Portugal       | Charco da Candieira     | Not recorded   |
|                | Lagoa Comprida 2        | Not recorded   |
| Syria          | Ghab                    | Early presence |
| Israel         | Hula Valley             | Early presence |
| Iran           | Gomishan                | Not recorded   |
|                | Lake Urmia              | Early presence |
|                | Lake Zeribar            | Not recorded   |
| Iraq           | Shanidar Cave           | Early presence |
| Georgia        | Gagra                   | Not recorded   |
|                | Dzudzuana Cave          | Early presence |
|                | Dmanisi                 | Early presence |
| Albania        | Lake Maliq              | Not recorded   |
|                | Lake Ohrid              | Early presence |
| 11.7 - 9 Ka BP |                         |                |
| Turkey         | Abant Gölü              | Not recorded   |
|                | Yeniçaga Gölü           | Discontinuous  |
|                | Göhlisar Gölü I         | Not recorded   |
|                | Göhlisar Gölü II        | Not recorded   |
|                | Kararmik Batakligi      | Not recorded   |
|                | Pinarbasi               | Not recorded   |
|                | Sögüt Gölü              | Not recorded   |
|                | Ladik Gölü              | Discontinuous  |
|                | Lake Van                | Discontinuous  |
| Greece         | Orestias                | Not recorded   |
|                | Khimaditis III          | Not recorded   |
|                | Edessa                  | Not recorded   |
|                | Ioannina I              | Not recorded   |
|                | Ioannina II             | Not recorded   |
|                | Halos                   | Not recorded   |
|                | Xinias                  | Not recorded   |
|                | Myrtoon basin           | Discontinuous  |
| Bulgary        | Beliya Kanton           | Continuous     |
|                | Kupena I                | Discontinuous  |
|                | Kupena II               | Discontinuous  |
|                | Ribno I                 | Not recorded   |
|                | Black Sea South         | Not recorded   |
|                | Black Sea Southwest     | Not recorded   |
|                | Black Sea West          | Not recorded   |
|                | Duranunlak II           | Not recorded   |
|                | Duranunlak I            | Not recorded   |
|                | Varna II                | Discontinuous  |
|                | Vitosha                 | Not recorded   |
| Romania        | Avrig I                 | Not recorded   |
|                | Mohos                   | Not recorded   |
|                | Luci                    | Not recorded   |
|                | Bisoca                  | Not recorded   |
|                | Semenic                 | Not recorded   |
|                | Stereioiu               | Not recorded   |
| Hungary        | Alsópáhok               | Not recorded   |
|                | Balaton Centre          | Not recorded   |
|                | Balaton Northeast       | Not recorded   |
|                | Balaton Southwest       | Not recorded   |
|                | Nagy-Mohos              | Not recorded   |
|                | Pötréte                 | Not recorded   |
|                | Szigliget               | Not recorded   |
| Slovakia       | Bobrov                  | Not recorded   |
| Czech Republic | Vracov                  | Not recorded   |

|             |                                         |                               |
|-------------|-----------------------------------------|-------------------------------|
|             | Palasiny                                | Not recorded                  |
|             | Blato I                                 | Not recorded                  |
|             | Kozli                                   | Not recorded                  |
|             | Rezabinec                               | Not recorded                  |
|             | Borkovicka blata                        | Not recorded                  |
|             | Loucky                                  | Not recorded                  |
|             | Chrást                                  | Not recorded                  |
|             | Velka niva                              | Not recorded                  |
|             | Strázenská slat                         | Not recorded                  |
|             | Komoranské jezero                       | Not recorded                  |
|             | <a href="#">Dolskym</a>                 | <a href="#">Discontinuous</a> |
| Poland      | Bledowo Lake                            | Not recorded                  |
|             | Lake Gosciadz                           | Not recorded                  |
|             | Lake Skrzetuszewskie                    | Not recorded                  |
|             | Swietokrzyskie Lake                     | Not recorded                  |
|             | Lake Mikolajki                          | Not recorded                  |
| Austria     | Puscizna Rekowianska                    | Not recorded                  |
|             | Dortmunder Hütte                        | Not recorded                  |
|             | Franz Senn-Hütte                        | Not recorded                  |
|             | Egelsee                                 | Not recorded                  |
|             | Gerlos                                  | Not recorded                  |
|             | Giering                                 | Not recorded                  |
|             | Lindenmoos                              | Not recorded                  |
|             | Mieminger See                           | Not recorded                  |
|             | Moor Alpenrose                          | Not recorded                  |
|             | Schwarzsee Reschenscheideck             | Not recorded                  |
|             | Schwemm                                 | Not recorded                  |
|             | <a href="#">Seefelder See</a>           | <a href="#">Discontinuous</a> |
|             | Wasenmoos beim Zellhof                  | Not recorded                  |
|             | Grosses Überling Schattseit-Moor        | Not recorded                  |
|             | Dürrenecksee-Moor                       | Not recorded                  |
|             | <a href="#">Fuchsschwanzmoos</a>        | <a href="#">Discontinuous</a> |
| Germany     | Fuschlsee                               | Not recorded                  |
|             | Lüttersee                               | Not recorded                  |
|             | Löddigsee                               | Not recorded                  |
|             | Brentenlohe                             | Not recorded                  |
|             | Glaswaldsee                             | Not recorded                  |
|             | Herrenwiesser see                       | Not recorded                  |
|             | Durchenbergried                         | Not recorded                  |
|             | <a href="#">Feuenried</a>               | <a href="#">Discontinuous</a> |
|             | Hornstaad-Bodensee                      | Not recorded                  |
|             | Huzenbacher See                         | Not recorded                  |
|             | Stierenmoos                             | Not recorded                  |
|             | Wilder See beim Ruhestein               | Not recorded                  |
|             | Wildseemoor bei Kaltenbronn             | Not recorded                  |
| Switzerland | Etang de la Gruère                      | Not recorded                  |
|             | Le Loclat                               | Not recorded                  |
|             | Lobsigensee                             | Not recorded                  |
|             | Montilier                               | Not recorded                  |
|             | Aegelsee                                | Not recorded                  |
|             | Amsoldingensee                          | Not recorded                  |
|             | Bachalpsee                              | Not recorded                  |
|             | Hinterburgseeli                         | Not recorded                  |
|             | Linden                                  | Not recorded                  |
|             | Oberaar                                 | Not recorded                  |
|             | Rotsee                                  | Not recorded                  |
|             | Sägistalsee                             | Not recorded                  |
|             | Stiftenegg                              | Not recorded                  |
|             | Aletschwald                             | Not recorded                  |
|             | Alpi di Robièi Val Bavona               | Not recorded                  |
|             | Bitsch-Naters                           | Not recorded                  |
|             | Eggen ob Blatten                        | Not recorded                  |
|             | Etang d'y Cor Montana                   | Not recorded                  |
|             | Hopschensee                             | Not recorded                  |
|             | <a href="#">Lac du Mont d'Orge Sion</a> | <a href="#">Discontinuous</a> |
|             | Mittlere Hellelen                       | Not recorded                  |
|             | Pillon Gsteig-Diablerets                | Not recorded                  |
|             | Simplon-Gampisch-Alter Spittel          | Not recorded                  |
|             | Wallbach Lenk                           | Not recorded                  |
|             | Mont Roux                               | Not recorded                  |
|             | Gamperfin                               | Not recorded                  |
|             | Creux de Croue                          | Not recorded                  |
|             | Motta Naluns                            | Not recorded                  |
| Italy       | Praz Rodet                              | Not recorded                  |
|             | Bondone                                 | Not recorded                  |
|             | Dura-Moor                               | Not recorded                  |

|        |                                            |                      |
|--------|--------------------------------------------|----------------------|
|        | Malschötscher Hotter                       | Not recorded         |
|        | Rinderplatz                                | Not recorded         |
|        | Schwarzsee                                 | Not recorded         |
|        | Sommersüss                                 | Not recorded         |
|        | Grunsee                                    | Not recorded         |
|        | Dossaccio Bormio                           | Not recorded         |
|        | Lac de Villa                               | Not recorded         |
|        | Lac du Verney-Dessus                       | Not recorded         |
|        | Torveraz                                   | Not recorded         |
|        | <b>Tourbière de Pilaz</b>                  | <b>Continuous</b>    |
|        | Tourbière de Santa Anna                    | Not recorded         |
|        | Laghi dell'Orgials                         | Not recorded         |
|        | Lago Piccolo di Avigliana                  | Not recorded         |
|        | Ortasee                                    | Not recorded         |
|        | Refugio Mondovi                            | Not recorded         |
|        | Selle di Carnino                           | Not recorded         |
|        | Torbiera del Biecai                        | Not recorded         |
|        | Lago della Costa                           | Not recorded         |
|        | Lago Padule                                | Not recorded         |
|        | Lago dell'Accesa                           | Not recorded         |
|        | Colfiorito                                 | Not recorded         |
|        | Pavullo                                    | Not recorded         |
|        | <b>Lago di Martignano</b>                  | <b>Discontinuous</b> |
|        | Lago di Vico                               | Not recorded         |
|        | Lago Albano                                | Not recorded         |
|        | <b>Lago di Nemi</b>                        | <b>Discontinuous</b> |
|        | Salerno Bay                                | Not recorded         |
|        | Lago Grande di Monticchio LGM              | Not recorded         |
| France | Aronde                                     | Not recorded         |
|        | Auneau                                     | Not recorded         |
|        | La Vie                                     | Not recorded         |
|        | Le Fourneau                                | Not recorded         |
|        | Moulin de Thévalles                        | Not recorded         |
|        | Pezou                                      | Not recorded         |
|        | Saint-Ursin                                | Not recorded         |
|        | Altenweiher                                | Not recorded         |
|        | Bellefontaine                              | Not recorded         |
|        | Hières sur Amby                            | Not recorded         |
|        | Loras                                      | Not recorded         |
|        | Etang du Lautrey                           | Not recorded         |
|        | Le Grand Lempis                            | Not recorded         |
|        | <b>Tourbières des Granges des Chavants</b> | <b>Discontinuous</b> |
|        | Ampoix                                     | Not recorded         |
|        | Champ Gazon                                | Not recorded         |
|        | Etang de Cheylade                          | Not recorded         |
|        | La Taphanel                                | Not recorded         |
|        | Lac du Bouchet                             | Not recorded         |
|        | Lac du Mont de Belier                      | Not recorded         |
|        | Le Miroir                                  | Not recorded         |
|        | <b>Marais du Grang Chaumet</b>             | <b>Discontinuous</b> |
|        | Moulin de Prugnolas                        | Not recorded         |
|        | Nataloup                                   | Not recorded         |
|        | Peyre peat-bog                             | Not recorded         |
|        | Saint-Benoit-sur-Loire                     | Not recorded         |
|        | Tourbière de Longeyroux                    | Not recorded         |
|        | <b>Tourbière de Roussy</b>                 | <b>Discontinuous</b> |
|        | Tourbière des Dauges                       | Not recorded         |
|        | Bois-Jésus                                 | Not recorded         |
|        | Cinq-Mars-la-Pile                          | Not recorded         |
|        | Cordemais                                  | Not recorded         |
|        | Jaunay                                     | Not recorded         |
|        | La Grande Brousse                          | Not recorded         |
|        | Marais de Champtocé                        | Not recorded         |
|        | Marais de Munet                            | Not recorded         |
|        | Marais de la Poupinière                    | Not recorded         |
|        | <b>Tourbière de Parçay-sur-Vienne</b>      | <b>Discontinuous</b> |
|        | Clapeyret                                  | Not recorded         |
|        | Col des Lauzes                             | Not recorded         |
|        | Correo                                     | Not recorded         |
|        | Grand Ratz le Pellet                       | Not recorded         |
|        | Lac Long Inférieur                         | Not recorded         |
|        | Lac des Boites                             | Not recorded         |
|        | Lake Racou                                 | Not recorded         |
|        | Lignin Lake                                | Not recorded         |
|        | Peuil Peat Bog                             | Not recorded         |
|        | Pré Rond                                   | Not recorded         |

|                  |                                |                                       |                               |                               |
|------------------|--------------------------------|---------------------------------------|-------------------------------|-------------------------------|
| 9 - 8 Ka BP      | Spain                          | Sabbion                               | Not recorded                  |                               |
|                  |                                | Saint Hilaire du Rosier               | Not recorded                  |                               |
|                  |                                | Saint Julien de Ratz                  | Not recorded                  |                               |
|                  |                                | <a href="#">Tourbière de Mont Sec</a> | <a href="#">Discontinuous</a> |                               |
|                  |                                | Cala Galdana                          | Not recorded                  |                               |
|                  |                                | Bajondillo                            | Not recorded                  |                               |
|                  |                                | El Pirulejo                           | Not recorded                  |                               |
|                  |                                | Navarrés                              | Not recorded                  |                               |
|                  |                                | Lago de Ajo                           | Not recorded                  |                               |
|                  |                                | Laguna de la Roya                     | Not recorded                  |                               |
|                  | Portugal                       | <a href="#">PRD-4</a>                 | <a href="#">Discontinuous</a> |                               |
|                  |                                | Saldropo                              | Not recorded                  |                               |
|                  |                                | Sanabria Marsh                        | Not recorded                  |                               |
|                  |                                | Quintanar de la Sierra                | Not recorded                  |                               |
|                  | Syria                          | Charco da Candieira                   | Not recorded                  |                               |
|                  |                                | Lagoa Comprida 2                      | Not recorded                  |                               |
|                  | Israel                         | <a href="#">Ghab</a>                  | <a href="#">Discontinuous</a> |                               |
|                  | Iran                           | Hula Valley (Israel)                  | Not recorded                  |                               |
|                  |                                | Gomishan                              | Not recorded                  |                               |
|                  | Georgia                        | Lake Urmia                            | Not recorded                  |                               |
|                  |                                | Lake Zeribar                          | Not recorded                  |                               |
|                  | Albania                        | Gagra (Georgia)                       | Not recorded                  |                               |
|                  |                                | Lake Maliq (Albania)                  | Not recorded                  |                               |
|                  | Turkey                         | Abant Gölü                            | Not recorded                  |                               |
|                  |                                | Yeniçaga Gölü                         | Not recorded                  |                               |
|                  |                                | Göhlisar Gölü I                       | Not recorded                  |                               |
|                  |                                | Göhlisar Gölü II                      | Not recorded                  |                               |
|                  |                                | Kararmik Batakligi                    | Not recorded                  |                               |
|                  |                                | Pinarbasi                             | Not recorded                  |                               |
|                  |                                | Sögüt Gölü                            | Not recorded                  |                               |
|                  |                                | Ladik Gölü                            | Not recorded                  |                               |
|                  |                                | <a href="#">Lake Van</a>              | <a href="#">Discontinuous</a> |                               |
|                  |                                | Greece                                | <a href="#">Orestias</a>      | <a href="#">Discontinuous</a> |
|                  |                                |                                       | Khimaditis III                | Not recorded                  |
|                  |                                |                                       | Edessa                        | Not recorded                  |
| Ioannina I       |                                |                                       | Not recorded                  |                               |
| Ioannina II      | Not recorded                   |                                       |                               |                               |
| Bulgary          | Halos                          | Not recorded                          |                               |                               |
|                  | <a href="#">Xinias</a>         | <a href="#">Discontinuous</a>         |                               |                               |
|                  | <a href="#">Myrtoon basin</a>  | <a href="#">Discontinuous</a>         |                               |                               |
|                  | <a href="#">Beliya Kanton</a>  | <a href="#">Continuous</a>            |                               |                               |
|                  | Kupena I                       | Not recorded                          |                               |                               |
|                  | Kupena II                      | Not recorded                          |                               |                               |
|                  | <a href="#">Ribno I</a>        | <a href="#">Discontinuous</a>         |                               |                               |
|                  | Black Sea South                | Not recorded                          |                               |                               |
|                  | Black Sea Southwest            | Not recorded                          |                               |                               |
|                  | Black Sea West                 | Not recorded                          |                               |                               |
| Romania          | Duranunlak II                  | Not recorded                          |                               |                               |
|                  | <a href="#">Duranunlak I</a>   | <a href="#">Discontinuous</a>         |                               |                               |
|                  | <a href="#">Shabla-Ezeretz</a> | <a href="#">Discontinuous</a>         |                               |                               |
|                  | Varna II                       | Not recorded                          |                               |                               |
|                  | Tchokljovo Marsh               | Not recorded                          |                               |                               |
|                  | Vitosha                        | Not recorded                          |                               |                               |
|                  | Avrig I                        | Not recorded                          |                               |                               |
|                  | Mohos                          | Not recorded                          |                               |                               |
|                  | Luci                           | Not recorded                          |                               |                               |
|                  | Bisoca                         | Not recorded                          |                               |                               |
| Hungary          | Semenic                        | Not recorded                          |                               |                               |
|                  | Steregoiu                      | Not recorded                          |                               |                               |
|                  | Alsópáhok                      | Not recorded                          |                               |                               |
|                  | Balaton Centre                 | Not recorded                          |                               |                               |
|                  | Balaton Northeast              | Not recorded                          |                               |                               |
|                  | Balaton Southwest              | Not recorded                          |                               |                               |
| Slovakia         | Nagy-Mohos                     | Not recorded                          |                               |                               |
|                  | Pötréte                        | Not recorded                          |                               |                               |
|                  | Szigliget                      | Not recorded                          |                               |                               |
|                  | Bobrov                         | Not recorded                          |                               |                               |
| Czech Republic   | Zlatnicka Dolina               | Not recorded                          |                               |                               |
|                  | Dvur Ansov                     | Not recorded                          |                               |                               |
|                  | Vracov                         | Not recorded                          |                               |                               |
|                  | Palasiny                       | Not recorded                          |                               |                               |
|                  | Blato I                        | Not recorded                          |                               |                               |
|                  | Kozli                          | Not recorded                          |                               |                               |
|                  | Rezabinec                      | Not recorded                          |                               |                               |
| Borkovicka blata | Not recorded                   |                                       |                               |                               |

|             |                                  |                               |
|-------------|----------------------------------|-------------------------------|
|             | Loucky                           | Not recorded                  |
|             | Chrást                           | Not recorded                  |
|             | Velka niva                       | Not recorded                  |
|             | Stráženská slat                  | Not recorded                  |
|             | Komoranské jezero                | Not recorded                  |
|             | Dolskym                          | Not recorded                  |
| Ukraina     | Dovjok Swamp                     | Not recorded                  |
|             | Maly Podleski                    | Not recorded                  |
| Poland      | Bledowo Lake                     | Not recorded                  |
|             | Lake Gosciąz                     | Not recorded                  |
|             | Lake Skrzetuszewskie             | Not recorded                  |
|             | Swietokrzyskie Lake              | Not recorded                  |
|             | Godziszewskie Lake               | Not recorded                  |
|             | Lake Mikolajki                   | Not recorded                  |
| Austria     | Puscizna Rekowianska             | Not recorded                  |
|             | Dortmunder Hütte                 | Not recorded                  |
|             | Franz Senn-Hütte                 | Not recorded                  |
|             | Egelsee                          | Not recorded                  |
|             | Gerlos                           | Not recorded                  |
|             | Giering                          | Not recorded                  |
|             | Grünau Moor                      | Not recorded                  |
|             | Lindenmoos                       | Not recorded                  |
|             | Mieminger See                    | Not recorded                  |
|             | Moor Alpenrose                   | Not recorded                  |
|             | Schwarzsee Reschenscheideck      | Not recorded                  |
|             | Schwemm                          | Not recorded                  |
|             | Seefelder See                    | Not recorded                  |
|             | Zirbenwaldmoor                   | Not recorded                  |
|             | Wasenmoos beim Zellhof           | Not recorded                  |
|             | Grosses Überling Schattseit-Moor | Not recorded                  |
|             | Dürrenecksee-Moor                | Not recorded                  |
|             | <a href="#">Fuchsschwanzmoos</a> | <a href="#">Discontinuous</a> |
|             | Fuschlsee                        | Not recorded                  |
| Germany     | Bruchberg                        | Not recorded                  |
|             | Lüttersee                        | Not recorded                  |
|             | Löddigsee                        | Not recorded                  |
|             | Wachel 3                         | Not recorded                  |
|             | Brentenlohe                      | Not recorded                  |
|             | Glaswaldsee                      | Not recorded                  |
|             | Herrenwiesser see                | Not recorded                  |
|             | Durchenbergried                  | Not recorded                  |
|             | Feuenried                        | Not recorded                  |
|             | Hornstaad-Bodensee               | Not recorded                  |
|             | Huzenbacher See                  | Not recorded                  |
|             | Stierenmoos                      | Not recorded                  |
|             | Wilder See beim Ruhestein        | Not recorded                  |
|             | Wildseemoor bei Kaltenbronn      | Not recorded                  |
| Switzerland | Etang de la Gruère               | Not recorded                  |
|             | Lobsigensee                      | Not recorded                  |
|             | Montilier                        | Not recorded                  |
|             | Aegelsee                         | Not recorded                  |
|             | Amsoldingersee                   | Not recorded                  |
|             | Bachalpsee                       | Not recorded                  |
|             | Hinterburgseeli                  | Not recorded                  |
|             | Linden                           | Not recorded                  |
|             | Oberaar                          | Not recorded                  |
|             | Rotsee                           | Not recorded                  |
|             | Sägistalsee                      | Not recorded                  |
|             | Stiftenegg                       | Not recorded                  |
|             | Aletschwald                      | Not recorded                  |
|             | Alpi di Robièi Val Bavona        | Not recorded                  |
|             | Bitsch-Naters                    | Not recorded                  |
|             | Eggen ob Blatten                 | Not recorded                  |
|             | Etang d'y Cor Montana            | Not recorded                  |
|             | Hopschensee                      | Not recorded                  |
|             | Lac du Mont d'Orge Sion          | Not recorded                  |
|             | Mittlere Hellelen                | Not recorded                  |
|             | Pillon Gsteig-Diablerets         | Not recorded                  |
|             | Simplon-Gampisch-Alter Spittel   | Not recorded                  |
|             | Wallbach Lenk                    | Not recorded                  |
|             | Mont Roux                        | Not recorded                  |
|             | Gamperfin                        | Not recorded                  |
|             | Creux de Croue                   | Not recorded                  |
|             | Motta Naluns                     | Not recorded                  |
|             | Praz Rodet                       | Not recorded                  |
| Italy       | Bondone                          | Not recorded                  |

|        |                                     |                               |
|--------|-------------------------------------|-------------------------------|
|        | Dura-Moor                           | Not recorded                  |
|        | Malschötscher Hotter                | Not recorded                  |
|        | Rinderplatz                         | Not recorded                  |
|        | Schwarzsee                          | Not recorded                  |
|        | Sommersüss                          | Not recorded                  |
|        | Grunsee                             | Not recorded                  |
|        | Dossaccio Bormio                    | Not recorded                  |
|        | Lac de Villa                        | Not recorded                  |
|        | Lac du Verney-Dessus                | Not recorded                  |
|        | Torveraz                            | Not recorded                  |
|        | <b>Tourbière de Pilaz</b>           | <b>Continuous</b>             |
|        | Tourbière de Santa Anna             | Not recorded                  |
|        | Laghi dell'Orgials                  | Not recorded                  |
|        | Lago Piccolo di Avigliana           | Not recorded                  |
|        | Ortasee                             | Not recorded                  |
|        | Refugio Mondovi                     | Not recorded                  |
|        | Selle di Carnino                    | Not recorded                  |
|        | Torbiera del Biecai                 | Not recorded                  |
|        | Lago della Costa                    | Not recorded                  |
|        | Lago Padule                         | Not recorded                  |
|        | <a href="#">Lago dell'Accesa</a>    | <a href="#">Discontinuous</a> |
|        | Colfiorito                          | Not recorded                  |
|        | Lago Pratignano                     | Not recorded                  |
|        | Pavullo                             | Not recorded                  |
|        | Lago di Martignano                  | Not recorded                  |
|        | Lago di Vico                        | Not recorded                  |
|        | <a href="#">Lago Albano</a>         | <a href="#">Discontinuous</a> |
|        | <a href="#">Lago di Nemi</a>        | <a href="#">Discontinuous</a> |
|        | Salerno Bay                         | Not recorded                  |
|        | Lago Grande di Monticchio LGM       | Not recorded                  |
| France | Aronde                              | Not recorded                  |
|        | Auneau                              | Not recorded                  |
|        | Baie de Seine estuary               | Not recorded                  |
|        | La Vie                              | Not recorded                  |
|        | Le Fourneau                         | Not recorded                  |
|        | Moulin de Thévalles                 | Not recorded                  |
|        | Pezou                               | Not recorded                  |
|        | Saint-Ursin                         | Not recorded                  |
|        | Serrent                             | Not recorded                  |
|        | Altenweiher                         | Not recorded                  |
|        | <a href="#">Bellefontaine</a>       | <a href="#">Discontinuous</a> |
|        | Hières sur Amby                     | Not recorded                  |
|        | Loras                               | Not recorded                  |
|        | Etang du Lautrey                    | Not recorded                  |
|        | Le Grand Lemps                      | Not recorded                  |
|        | Tourbières des Granges des Chavants | Not recorded                  |
|        | Ampoix                              | Not recorded                  |
|        | Champ Gazon                         | Not recorded                  |
|        | Etang de Cheylade                   | Not recorded                  |
|        | La Taphanel                         | Not recorded                  |
|        | Lac du Bouchet                      | Not recorded                  |
|        | Lac du Mont de Belier               | Not recorded                  |
|        | Le Miroir                           | Not recorded                  |
|        | Marais du Grang Chaumet             | Not recorded                  |
|        | Moulin de Prugnolas                 | Not recorded                  |
|        | Nataloup                            | Not recorded                  |
|        | Peyre peat-bog                      | Not recorded                  |
|        | Saint-Benoit-sur-Loire              | Not recorded                  |
|        | Tourbière de Longeyroux             | Not recorded                  |
|        | Tourbière de Roussy                 | Not recorded                  |
|        | Tourbière des Dagues                | Not recorded                  |
|        | Tourbière de Chabannes              | Not recorded                  |
|        | Ancenis                             | Not recorded                  |
|        | Bois-Jésus                          | Not recorded                  |
|        | <a href="#">Caves d'Amont</a>       | <a href="#">Discontinuous</a> |
|        | <a href="#">Cinq-Mars-la-Pile</a>   | <a href="#">Discontinuous</a> |
|        | Cordemais                           | Not recorded                  |
|        | Ecours                              | Not recorded                  |
|        | <a href="#">Jaunay</a>              | <a href="#">Discontinuous</a> |
|        | La Grande Brousse                   | Not recorded                  |
|        | Le Gesvres                          | Not recorded                  |
|        | Marais de Champtocé                 | Not recorded                  |
|        | Marais de Munet                     | Not recorded                  |
|        | Marais de la Poupinière             | Not recorded                  |
|        | Petit Rocher                        | Not recorded                  |
|        | Tourbière de Parçay-sur-Vienne      | Not recorded                  |

|             |          |                         |               |
|-------------|----------|-------------------------|---------------|
|             |          | Clapeyret               | Not recorded  |
|             |          | Col des Lauzes          | Not recorded  |
|             |          | Correo                  | Not recorded  |
|             |          | Embouchac               | Not recorded  |
|             |          | Etang d'Ouveillan       | Not recorded  |
|             |          | Grand Ratz le Pellet    | Not recorded  |
|             |          | Lac Long Inférieur      | Not recorded  |
|             |          | Lac des Boites          | Not recorded  |
|             |          | Lake Racou              | Not recorded  |
|             |          | Lignin Lake             | Not recorded  |
|             |          | Peuil Peat Bog          | Not recorded  |
|             |          | Pré Rond                | Not recorded  |
|             |          | Sabbion                 | Not recorded  |
|             |          | Saint Hilaire du Rosier | Not recorded  |
|             |          | Saint Julien de Ratz    | Not recorded  |
|             |          | Tourbière de Mont Sec   | Not recorded  |
|             | Spain    | Algendar                | Not recorded  |
|             |          | Cala Galdana            | Not recorded  |
|             |          | Antas                   | Discontinuous |
|             |          | Bajondillo              | Not recorded  |
|             |          | El Pirulejo             | Not recorded  |
|             |          | Navarrés                | Not recorded  |
|             |          | Lago de Ajo             | Not recorded  |
|             |          | Laguna de la Roya       | Not recorded  |
|             |          | PRD-4                   | Discontinuous |
|             |          | Saldropo                | Not recorded  |
|             |          | Sanabria Marsh          | Discontinuous |
|             |          | Quintanar de la Sierra  | Not recorded  |
|             | Portugal | Charco da Candieira     | Not recorded  |
|             |          | Lagoa Comprida 2        | Not recorded  |
|             | Syria    | Ghab                    | Not recorded  |
|             | Israel   | Hula Valley             | Not recorded  |
|             | Iran     | Gomishan                | Not recorded  |
|             |          | Lake Urmia              | Discontinuous |
|             |          | Lake Zeribar            | Not recorded  |
|             | Georgia  | Gagra                   | Not recorded  |
|             |          | Lagodekhi               | Not recorded  |
|             | Albania  | Lake Maliq              | Not recorded  |
| 8 - 7 Ka BP |          |                         |               |
|             | Turkey   | Abant Gölü              | Not recorded  |
|             |          | Yeniçaga Gölü           | Not recorded  |
|             |          | Göhlisar Gölü I         | Not recorded  |
|             |          | Göhlisar Gölü II        | Not recorded  |
|             |          | Karamik Batakligi       | Not recorded  |
|             |          | Pinarbasi               | Not recorded  |
|             |          | Sögüt Gölü              | Not recorded  |
|             |          | Ladik Gölü              | Not recorded  |
|             |          | Lake Van                | Not recorded  |
|             | Greece   | Orestias (Greece)       | In expansion  |
|             |          | Khimaditis III          | Not recorded  |
|             |          | Edessa                  | Not recorded  |
|             |          | Trikhonis               | Not recorded  |
|             |          | Ioannina I              | Not recorded  |
|             |          | Ioannina II             | Discontinuous |
|             |          | Halos                   | Not recorded  |
|             |          | Xinias                  | Not recorded  |
|             |          | Myrtoon Basin           | Discontinuous |
|             | Bulgary  | Beliya Kanton           | Continuous    |
|             |          | Kupena I                | In expansion  |
|             |          | Kupena II               | Not recorded  |
|             |          | Ribno I                 | Discontinuous |
|             |          | Popovo Ezero            | Not recorded  |
|             |          | Black Sea South         | Not recorded  |
|             |          | Black Sea Southwest     | Not recorded  |
|             |          | Black Sea West          | Discontinuous |
|             |          | Duranunlak II           | Not recorded  |
|             |          | Duranunlak I            | Discontinuous |
|             |          | Shabla-Ezeretz          | Discontinuous |
|             |          | Varna I                 | Not recorded  |
|             |          | Varna II                | Not recorded  |
|             |          | Tchokljovo Marsh        | Not recorded  |
|             | Romania  | Vitosha                 | Not recorded  |
|             |          | Avrig I                 | Not recorded  |
|             |          | Mohos                   | Not recorded  |
|             |          | Luci                    | Not recorded  |
|             |          | Bisoca                  | Not recorded  |

|                |                                  |                               |
|----------------|----------------------------------|-------------------------------|
|                | Calinease                        | Not recorded                  |
|                | Semenic                          | Not recorded                  |
|                | Steregoiu                        | Not recorded                  |
| Hungary        | Alsópáhok                        | Not recorded                  |
|                | Balaton Centre                   | Not recorded                  |
|                | Balaton Northeast                | Not recorded                  |
|                | Balaton Southwest                | Not recorded                  |
|                | Nagy-Mohos                       | Not recorded                  |
|                | Pötréte                          | Not recorded                  |
|                | Szigliget                        | Not recorded                  |
| Slovakia       | Bobrov                           | Not recorded                  |
|                | Zlatnická Dolina                 | Not recorded                  |
| Czech Republic | Dvur Ansov                       | Not recorded                  |
|                | Vracov                           | Not recorded                  |
|                | Palasiny                         | Not recorded                  |
|                | Blato I                          | Not recorded                  |
|                | Kozli                            | Not recorded                  |
|                | Rezabinec                        | Not recorded                  |
|                | Borkovicka blata                 | Not recorded                  |
|                | Branna                           | Not recorded                  |
|                | Loucky                           | Not recorded                  |
|                | Chrást                           | Not recorded                  |
|                | Velka niva                       | Not recorded                  |
|                | Stráženská slat                  | Not recorded                  |
|                | Komoranské jezero                | Not recorded                  |
|                | Dolskym                          | Not recorded                  |
| Ukraina        | Dovjok Swamp                     | Not recorded                  |
|                | Maly Podleski                    | Not recorded                  |
| Croatia        | Bokanjacko                       | Not recorded                  |
| Poland         | Bledowo Lake                     | Not recorded                  |
|                | Giecz                            | Not recorded                  |
|                | <a href="#">Lake Gosciaz</a>     | <a href="#">Discontinuous</a> |
|                | Lake Skrzetuszewskie             | Not recorded                  |
|                | Swietokrzyskie Lake              | Not recorded                  |
|                | Godziszewskie Lake               | Not recorded                  |
|                | Lake Mikolajki                   | Not recorded                  |
|                | Puscizna Rekowianska             | Not recorded                  |
| Austria        | Dortmunder Hütte                 | Not recorded                  |
|                | Franz Senn-Hütte                 | Not recorded                  |
|                | Egelsee                          | Not recorded                  |
|                | Gerlos                           | Not recorded                  |
|                | Giering                          | Not recorded                  |
|                | Grünau Moor                      | Not recorded                  |
|                | Lindenmoos                       | Not recorded                  |
|                | Mieminger See                    | Not recorded                  |
|                | Moor Alpenrose                   | Not recorded                  |
|                | Schwarzsee Reschenscheideck      | Not recorded                  |
|                | Schwemm                          | Not recorded                  |
|                | Seefelder See                    | Not recorded                  |
|                | Zirbenwaldmoor                   | Not recorded                  |
|                | Wasenmoos beim Zellhof           | Not recorded                  |
|                | Grosses Überling Schattseit-Moor | Not recorded                  |
|                | Dürrenecksee-Moor                | Not recorded                  |
|                | <a href="#">Fuchsschwanzmoos</a> | <a href="#">Discontinuous</a> |
|                | Fuschlsee                        | Not recorded                  |
| Germany        | Ahlequellmoor                    | Not recorded                  |
|                | Bruchberg                        | Not recorded                  |
|                | Lüttersee                        | Not recorded                  |
|                | Löddigsee                        | Not recorded                  |
|                | Wachel 3                         | Not recorded                  |
|                | Brentenlohe                      | Not recorded                  |
|                | Glaswaldsee                      | Not recorded                  |
|                | Herrenwiesser see                | Not recorded                  |
|                | Durchenbergried                  | Not recorded                  |
|                | <a href="#">Feuenried</a>        | <a href="#">Discontinuous</a> |
|                | Hornstaad-Bodensee               | Not recorded                  |
|                | Huzenbacher See                  | Not recorded                  |
|                | Mindelsee                        | Not recorded                  |
|                | Steerenmoos                      | Not recorded                  |
|                | Wilder See beim Ruhestein        | Not recorded                  |
|                | Wildseemoor bei Kaltenbronn      | Not recorded                  |
| Switzerland    | Etang de la Gruère               | Not recorded                  |
|                | Le Loclat                        | Not recorded                  |
|                | Lobsigensee                      | Not recorded                  |
|                | Montilier                        | Not recorded                  |
|                | Aegelsee                         | Not recorded                  |



|        |                                         |                               |
|--------|-----------------------------------------|-------------------------------|
|        | Amsoldingerse                           | Not recorded                  |
|        | Bachalpsee                              | Not recorded                  |
|        | Hinterburgseeli                         | Not recorded                  |
|        | Hängstli                                | Not recorded                  |
|        | Linden                                  | Not recorded                  |
|        | Oberaar                                 | Not recorded                  |
|        | Rotsee                                  | Not recorded                  |
|        | Schwarzsee FR                           | Not recorded                  |
|        | Sägistalsee                             | Not recorded                  |
|        | Stiftenenegg                            | Not recorded                  |
|        | Aletschwald                             | Not recorded                  |
|        | Alp Lüsga Belalp 1                      | Not recorded                  |
|        | Alpi di Robièi Val Bavona               | Not recorded                  |
|        | Alpi di Robièi Val Bavona Bodenprofil   | Not recorded                  |
|        | Bitsch-Naters                           | Not recorded                  |
|        | <a href="#">Eggen ob Blatten</a>        | <a href="#">Discontinuous</a> |
|        | Etang d'y Cor Montana                   | Not recorded                  |
|        | Gondo Alpjen                            | Not recorded                  |
|        | Grächen See                             | Not recorded                  |
|        | Hopschensee                             | Not recorded                  |
|        | <a href="#">Lac du Mont d'Orge Sion</a> | <a href="#">Discontinuous</a> |
|        | Mittlere Hellelen                       | Not recorded                  |
|        | Pillon Gsteig-Diablerets                | Not recorded                  |
|        | Simplon-Gampisch-Alter Spittel          | Not recorded                  |
|        | Wallbach Lenk                           | Not recorded                  |
|        | Mont Roux                               | Not recorded                  |
|        | Gamperfin                               | Not recorded                  |
|        | Creux de Croue                          | Not recorded                  |
|        | Motta Naluns                            | Not recorded                  |
|        | Praz Rodet                              | Not recorded                  |
| Italy  | Bondone                                 | Not recorded                  |
|        | Dura-Moor                               | Not recorded                  |
|        | Malschötscher Hotter                    | Not recorded                  |
|        | Rinderplatz                             | Not recorded                  |
|        | Schwarzsee                              | Not recorded                  |
|        | Sommersüss                              | Not recorded                  |
|        | <a href="#">Grunsee</a>                 | <a href="#">Discontinuous</a> |
|        | Dossaccio Bormio                        | Not recorded                  |
|        | Lac de Villa                            | Not recorded                  |
|        | Lac du Verney-Dessus                    | Not recorded                  |
|        | Torveraz                                | Not recorded                  |
|        | <a href="#">Tourbière de Pilaz</a>      | <a href="#">Continuous</a>    |
|        | Tourbière de Santa Anna                 | Not recorded                  |
|        | Laghi dell'Orgials                      | Not recorded                  |
|        | Lago Piccolo di Avigliana               | Not recorded                  |
|        | <a href="#">Ortasee</a>                 | <a href="#">Discontinuous</a> |
|        | Refugio Mondovi                         | Not recorded                  |
|        | Selle di Carnino                        | Not recorded                  |
|        | Torbiera del Biecai                     | Not recorded                  |
|        | Lago della Costa                        | Not recorded                  |
|        | Lago Padule                             | Not recorded                  |
|        | Lago dell'Accesa                        | Not recorded                  |
|        | Colfiorito                              | Not recorded                  |
|        | Lago Pratignano                         | Not recorded                  |
|        | Pavullo                                 | Not recorded                  |
|        | <a href="#">Lago di Martignano</a>      | <a href="#">Discontinuous</a> |
|        | Lago di Vico                            | Not recorded                  |
|        | <a href="#">Lago Albano</a>             | <a href="#">Discontinuous</a> |
|        | <a href="#">Lago di Nemi</a>            | <a href="#">Discontinuous</a> |
|        | Central Adriatic Sea                    | Not recorded                  |
|        | Salerno Bay                             | Not recorded                  |
|        | Lago Grande di Monticchio LGM           | Not recorded                  |
| France | Aronde                                  | Not recorded                  |
|        | Auneau                                  | Not recorded                  |
|        | Baie de Seine estuary                   | Not recorded                  |
|        | La Vie                                  | Not recorded                  |
|        | Le Fourneau                             | Not recorded                  |
|        | Moulin de Thévalles                     | Not recorded                  |
|        | Pezou                                   | Not recorded                  |
|        | Saint-Ursin                             | Not recorded                  |
|        | Serrent                                 | Not recorded                  |
|        | Altenweiher                             | Not recorded                  |
|        | Bellefontaine                           | Not recorded                  |
|        | Hières sur Amby                         | Not recorded                  |
|        | Loras                                   | Not recorded                  |
|        | Lutinière                               | Not recorded                  |

|          |                                     |                               |
|----------|-------------------------------------|-------------------------------|
|          | <a href="#">Etang du Lautrey</a>    | <a href="#">Discontinuous</a> |
|          | Le Grand Lemps                      | Not recorded                  |
|          | Tourbières des Granges des Chavants | Not recorded                  |
|          | Ampoix                              | Not recorded                  |
|          | Champ Gazon                         | Not recorded                  |
|          | Etang de Cheylade                   | Not recorded                  |
|          | La Taphanel                         | Not recorded                  |
|          | Lac du Bouchet                      | Not recorded                  |
|          | Lac du Mont de Belier               | Not recorded                  |
|          | Le Grand Montarnu                   | Not recorded                  |
|          | Le Miroir                           | Not recorded                  |
|          | Marais du Grang Chaumet             | Not recorded                  |
|          | Moulin de Prugnolas                 | Not recorded                  |
|          | Nataloup                            | Not recorded                  |
|          | Peyre peat-bog                      | Not recorded                  |
|          | Saint-Benoit-sur-Loire              | Not recorded                  |
|          | Tourbière de Longeyroux             | Not recorded                  |
|          | Tourbière de Roussy                 | Not recorded                  |
|          | Tourbière des Dauges                | Not recorded                  |
|          | Tourbière de Chabannes              | Not recorded                  |
|          | Ancenis                             | Not recorded                  |
|          | Basse-Ville                         | Not recorded                  |
|          | Bois-Jésus                          | Not recorded                  |
|          | Caves d'Amont                       | Not recorded                  |
|          | Cinq-Mars-la-Pile                   | Not recorded                  |
|          | Cordemais                           | Not recorded                  |
|          | <a href="#">Ecours</a>              | <a href="#">Discontinuous</a> |
|          | <a href="#">Jaunay</a>              | <a href="#">Discontinuous</a> |
|          | La Grande Brousse                   | Not recorded                  |
|          | La Grange                           | Not recorded                  |
|          | Le Gesvres                          | Not recorded                  |
|          | Marais de Champtocé                 | Not recorded                  |
|          | Marais de Mazerolles                | Not recorded                  |
|          | Marais de Munet                     | Not recorded                  |
|          | Marais de la Poupinière             | Not recorded                  |
|          | Oudon                               | Not recorded                  |
|          | Petit Marais                        | Not recorded                  |
|          | Petit Rocher                        | Not recorded                  |
|          | Tourbière de Nay                    | Not recorded                  |
|          | Tourbière de Parçay-sur-Vienne      | Not recorded                  |
|          | Vertonne                            | Not recorded                  |
|          | Clapeyret                           | Not recorded                  |
|          | Col Luitel                          | Not recorded                  |
|          | Col des Lauzes                      | Not recorded                  |
|          | Correo                              | Not recorded                  |
|          | Embouchac                           | Not recorded                  |
|          | Etang d'Ouveillan                   | Not recorded                  |
|          | Grand Ratz le Pellet                | Not recorded                  |
|          | Lac Long Inférieur                  | Not recorded                  |
|          | Lac des Boites                      | Not recorded                  |
|          | Lac du Lauzon                       | Not recorded                  |
|          | Lake Racou                          | Not recorded                  |
|          | <a href="#">Lignin Lake</a>         | <a href="#">In expansion</a>  |
|          | Peuil Peat Bog                      | Not recorded                  |
|          | Pré Rond                            | Not recorded                  |
|          | Sabbion                             | Not recorded                  |
|          | Saint Hilaire du Rosier             | Not recorded                  |
|          | Saint Julien de Ratz                | Not recorded                  |
|          | Tourbière de Gatimort               | Not recorded                  |
|          | Tourbière de Mont Sec               | Not recorded                  |
| Spain    | Albufera Alcudia                    | Not recorded                  |
|          | Algendar                            | Not recorded                  |
|          | Cala Galdana                        | Not recorded                  |
|          | Cala'n Porter                       | Not recorded                  |
|          | Antas                               | Not recorded                  |
|          | Bajondillo                          | Not recorded                  |
|          | Navarrés                            | Not recorded                  |
|          | Lago de Ajo                         | Not recorded                  |
|          | Laguna de la Roya                   | Not recorded                  |
|          | <a href="#">PRD-4</a>               | <a href="#">Discontinuous</a> |
|          | Puerto de Los Tornos                | Not recorded                  |
|          | Saldropo                            | Not recorded                  |
|          | Sanabria Marsh                      | Not recorded                  |
| Portugal | Quintanar de la Sierra              | Not recorded                  |
|          | Charco da Candieira                 | Not recorded                  |
|          | <a href="#">Lagoa Comprida 2</a>    | <a href="#">Discontinuous</a> |

|                  |                     |                    |                |              |
|------------------|---------------------|--------------------|----------------|--------------|
| 7 - 6 Ka BP      | Syria               | Lagoa Travessa I   | Not recorded   |              |
|                  | Israel              | Ghab (Syria)       | Not recorded   |              |
|                  | Iran                | Hula Valley        | Not recorded   |              |
|                  |                     | Gomishan           | Not recorded   |              |
|                  |                     | Lake Urmia         | Not recorded   |              |
|                  | Georgia             | Lake Zeribar       | Not recorded   |              |
|                  |                     | Gagra              | Not recorded   |              |
|                  |                     | Lagodekhi          | Not recorded   |              |
|                  | Albania             | Lake Maliq         | Not recorded   |              |
|                  | Turkey              | Abant Gölü         | Not recorded   |              |
|                  |                     | Yeniçaga Gölü      | Discontinuous  |              |
|                  |                     | Beyschir Gölü I    | Not recorded   |              |
|                  |                     | Göhlisar Gölü I    | Not recorded   |              |
|                  |                     | Göhlisar Gölü II   | Not recorded   |              |
|                  |                     | Kararmik Batakligi | Discontinuous  |              |
|                  |                     | Ova Gölü           | Not recorded   |              |
|                  |                     | Pınarbasi          | Not recorded   |              |
|                  |                     | Söğüt Gölü         | Not recorded   |              |
|                  |                     | Ladik Gölü         | Discontinuous  |              |
|                  |                     | Lake Van           | Not recorded   |              |
|                  |                     | Greece             | Orestias       | Continuous   |
|                  |                     |                    | Khimaditis III | Not recorded |
|                  | Edessa              |                    | Not recorded   |              |
|                  | Lerna               |                    | Discontinuous  |              |
|                  | Trikhonis           |                    | Not recorded   |              |
|                  | Ioannina I          |                    | Not recorded   |              |
|                  | Ioannina II         |                    | Not recorded   |              |
| Halos            | Not recorded        |                    |                |              |
| Xinias           | Discontinuous       |                    |                |              |
| Pertouli         | Not recorded        |                    |                |              |
| Bulgary          | Myrtoon Basin       | Discontinuous      |                |              |
|                  | Beliya Kanton       | Continuous         |                |              |
|                  | Kupena I            | Continuous         |                |              |
|                  | Kupena II           | Not recorded       |                |              |
|                  | Ribno I             | Discontinuous      |                |              |
|                  | Popovo Ezero        | Not recorded       |                |              |
|                  | Sozopol             | Continuous         |                |              |
|                  | Arkutino I          | Not recorded       |                |              |
|                  | Arkutino II         | Discontinuous      |                |              |
|                  | Black Sea South     | Not recorded       |                |              |
|                  | Black Sea Southwest | Not recorded       |                |              |
|                  | Black Sea West      | In expansion       |                |              |
|                  | Duranunlak II       | Not recorded       |                |              |
|                  | Duranunlak I        | Discontinuous      |                |              |
|                  | Shabla-Ezeretz      | Discontinuous      |                |              |
| Romania          | Varna I             | Not recorded       |                |              |
|                  | Varna II            | Discontinuous      |                |              |
|                  | Mire Garvan         | Not recorded       |                |              |
|                  | Maleshevska         | Continuous         |                |              |
|                  | Tchokljovo Marsh    | Discontinuous      |                |              |
|                  | Vitosha             | Not recorded       |                |              |
|                  | Avrig I             | Not recorded       |                |              |
|                  | Mohos               | Not recorded       |                |              |
|                  | Luci                | Not recorded       |                |              |
|                  | Bisoca              | Not recorded       |                |              |
| Hungary          | Calinease           | Not recorded       |                |              |
|                  | Semenic             | Not recorded       |                |              |
|                  | Steregoiu           | Not recorded       |                |              |
|                  | Alsópáhok           | Not recorded       |                |              |
|                  | Balaton Centre      | Not recorded       |                |              |
|                  | Balaton Northeast   | Not recorded       |                |              |
|                  | Balaton Southwest   | Not recorded       |                |              |
| Slovakia         | Nagy-Mohos          | Not recorded       |                |              |
|                  | Pötréte             | Not recorded       |                |              |
|                  | Szigliget           | Not recorded       |                |              |
| Czech Republic   | Bobrov              | Not recorded       |                |              |
|                  | Zlatnicka Dolina    | Not recorded       |                |              |
|                  | Dvur Ansov          | Not recorded       |                |              |
|                  | Vracov              | Not recorded       |                |              |
|                  | Palasiny            | Not recorded       |                |              |
|                  | Blato I             | Discontinuous      |                |              |
|                  | Kozli               | Not recorded       |                |              |
|                  | Rezabinec           | Not recorded       |                |              |
| Borkovicka blata | Discontinuous       |                    |                |              |
| Branna           | Not recorded        |                    |                |              |

|             |                                       |                               |
|-------------|---------------------------------------|-------------------------------|
|             | Loucky                                | Not recorded                  |
|             | <a href="#">Chrát</a>                 | <a href="#">Discontinuous</a> |
|             | Velka niva                            | Not recorded                  |
|             | Mrtv8 luh                             | Not recorded                  |
|             | Stráženská slat                       | Not recorded                  |
|             | Komoranské jezero                     | Not recorded                  |
|             | Dolskym                               | Not recorded                  |
| Ukraina     | Dovjok Swamp                          | Not recorded                  |
|             | <a href="#">Maly Podleski</a>         | <a href="#">Discontinuous</a> |
| Croatia     | Bokanjacko                            | Not recorded                  |
| Poland      | Bledowo Lake                          | Not recorded                  |
|             | Giecz                                 | Not recorded                  |
|             | Lake Gosciaz                          | Not recorded                  |
|             | Lake Skrzetuszewskie                  | Not recorded                  |
|             | Slawsko                               | Not recorded                  |
|             | Swietokrzyskie Lake                   | Not recorded                  |
|             | Godziszewskie Lake                    | Not recorded                  |
|             | Lake Mikolajki                        | Not recorded                  |
|             | Puscizna Rekowianska                  | Not recorded                  |
| Austria     | Buntes Moor                           | Not recorded                  |
|             | Dortmunder Hütte                      | Not recorded                  |
|             | Franz Senn-Hütte                      | Not recorded                  |
|             | Egelsee                               | Not recorded                  |
|             | Gerlos                                | Not recorded                  |
|             | Giering                               | Not recorded                  |
|             | Grünau Moor                           | Not recorded                  |
|             | Lindenmoos                            | Not recorded                  |
|             | Mieminger See                         | Not recorded                  |
|             | Moor Alpenrose                        | Not recorded                  |
|             | Rotmoos Obergurgl                     | Not recorded                  |
|             | Schwarzsee Reschenscheideck           | Not recorded                  |
|             | Schwemm                               | Not recorded                  |
|             | Seefelder See                         | Not recorded                  |
|             | Zirbenwaldmoor                        | Not recorded                  |
|             | Wasenmoos beim Zellhof                | Not recorded                  |
|             | Grosses Überling Schattseit-Moor      | Not recorded                  |
|             | Dürrenecksee-Moor                     | Not recorded                  |
|             | <a href="#">Fuchsschwanzmoos</a>      | <a href="#">Discontinuous</a> |
|             | Fuschlse                              | Not recorded                  |
| Germany     | Ahlequellmoor                         | Not recorded                  |
|             | Bruchberg                             | Not recorded                  |
|             | Lüttersee                             | Not recorded                  |
|             | Silberhohl                            | Not recorded                  |
|             | Löddigsee                             | Not recorded                  |
|             | Wachel 3                              | Not recorded                  |
|             | Brentenlohe                           | Not recorded                  |
|             | Glaswaldsee                           | Not recorded                  |
|             | Herrenwiesser see                     | Not recorded                  |
|             | Durchenbergried                       | Not recorded                  |
|             | Feuenried                             | Not recorded                  |
|             | Hornstaad-Bodensee                    | Not recorded                  |
|             | Huzenbacher See                       | Not recorded                  |
|             | Mindelsee                             | Not recorded                  |
|             | Stierenmoos                           | Not recorded                  |
|             | Wilder See beim Ruhestein             | Not recorded                  |
|             | Wildseemoor bei Kaltenbronn           | Not recorded                  |
| Switzerland | Etang de la Gruère                    | Not recorded                  |
|             | Le Loclat                             | Not recorded                  |
|             | Lobsigensee                           | Not recorded                  |
|             | Montilier                             | Not recorded                  |
|             | Aegelsee                              | Not recorded                  |
|             | Amsoldingersee                        | Not recorded                  |
|             | Bachalpsee                            | Not recorded                  |
|             | Hinterburgseeli                       | Not recorded                  |
|             | Hängstli                              | Not recorded                  |
|             | Linden                                | Not recorded                  |
|             | Oberaar                               | Not recorded                  |
|             | Rotsee                                | Not recorded                  |
|             | Schwarzsee FR                         | Not recorded                  |
|             | Sägistalsee                           | Not recorded                  |
|             | Süftenenegg                           | Not recorded                  |
|             | Aletschwald                           | Not recorded                  |
|             | Alp Lüsga Belalp 1                    | Not recorded                  |
|             | Alpi di Robièi Val Bavona             | Not recorded                  |
|             | Alpi di Robièi Val Bavona Bodenprofil | Not recorded                  |
|             | Bitsch-Naters                         | Not recorded                  |

|                                     |                                      |                               |
|-------------------------------------|--------------------------------------|-------------------------------|
|                                     | Eggen ob Blatten                     | Not recorded                  |
|                                     | Etang d'y Cor Montana                | Not recorded                  |
|                                     | <a href="#">Etang de Luissel Bex</a> | <a href="#">Discontinuous</a> |
|                                     | Gondo Alpjen                         | Not recorded                  |
|                                     | Greicheralp Riederalp                | Not recorded                  |
|                                     | Grächen See                          | Not recorded                  |
|                                     | Hopschensee                          | Not recorded                  |
|                                     | Lac du Mont d'Orge Sion              | Not recorded                  |
|                                     | Mittlere Hellelen                    | Not recorded                  |
|                                     | Pillon Gsteig-Diablerets             | Not recorded                  |
|                                     | Simplon-Gampisch-Alter Spittel       | Not recorded                  |
|                                     | Wallbach Lenk                        | Not recorded                  |
|                                     | Mont Roux                            | Not recorded                  |
|                                     | Gamperfin                            | Not recorded                  |
|                                     | Creux de Croue                       | Not recorded                  |
|                                     | Motta Naluns                         | Not recorded                  |
|                                     | Praz Rodet                           | Not recorded                  |
| Italy                               | Bondone                              | Not recorded                  |
|                                     | Dura-Moor                            | Not recorded                  |
|                                     | Malschötscher Hotter                 | Not recorded                  |
|                                     | Rinderplatz                          | Not recorded                  |
|                                     | Schwarzsee                           | Not recorded                  |
|                                     | Sommersüss                           | Not recorded                  |
|                                     | Grunsee                              | Not recorded                  |
|                                     | Dossaccio Bormio                     | Not recorded                  |
|                                     | Lac de Villa                         | Not recorded                  |
|                                     | Lac du Verney-Dessus                 | Not recorded                  |
|                                     | Torveraz                             | Not recorded                  |
|                                     | <a href="#">Tourbière de Pilaz</a>   | <a href="#">Continuous</a>    |
|                                     | Tourbière de Santa Anna              | Not recorded                  |
|                                     | Laghi dell'Orgials                   | Not recorded                  |
|                                     | Lago Piccolo di Avigliana            | Not recorded                  |
|                                     | Ortasee                              | Not recorded                  |
|                                     | Refugio Mondovi                      | Not recorded                  |
|                                     | Selle di Carnino                     | Not recorded                  |
|                                     | Torbiera del Biecai                  | Not recorded                  |
|                                     | <a href="#">Lago della Costa</a>     | <a href="#">Continuous</a>    |
|                                     | Lago Padule                          | Not recorded                  |
|                                     | <a href="#">Lago dell'Accesa</a>     | <a href="#">Discontinuous</a> |
|                                     | Colfiorito                           | Not recorded                  |
|                                     | Lago Pratignano                      | Not recorded                  |
|                                     | Pavullo                              | Not recorded                  |
|                                     | <a href="#">Lago di Martignano</a>   | <a href="#">In expansion</a>  |
|                                     | Lago di Vico                         | Not recorded                  |
|                                     | <a href="#">Lago Albano</a>          | <a href="#">Discontinuous</a> |
|                                     | <a href="#">Lago di Nemi</a>         | <a href="#">Discontinuous</a> |
|                                     | <a href="#">Central Adriatic Sea</a> | <a href="#">Discontinuous</a> |
|                                     | Salerno Bay                          | Not recorded                  |
|                                     | Lago Grande di Monticchio LGM        | Not recorded                  |
|                                     | France                               | Aronde                        |
| Auneau                              |                                      | Not recorded                  |
| Baie de Seine estuary               |                                      | Not recorded                  |
| La Vie                              |                                      | Not recorded                  |
| Le Fourneau                         |                                      | Not recorded                  |
| Marais de Lisle                     |                                      | Not recorded                  |
| Moulin de Thévalles                 |                                      | Not recorded                  |
| Pezou                               |                                      | Not recorded                  |
| Saint-Ursin                         |                                      | Not recorded                  |
| Serrent                             |                                      | Not recorded                  |
| Altenweiher                         |                                      | Not recorded                  |
| Hières sur Amby                     |                                      | Not recorded                  |
| Loras                               |                                      | Not recorded                  |
| Lutinière                           |                                      | Not recorded                  |
| Moselotte                           |                                      | Not recorded                  |
| Le Grand Lemps                      |                                      | Not recorded                  |
| Tourbières des Granges des Chavants |                                      | Not recorded                  |
| Ampoix                              |                                      | Not recorded                  |
| Champ Gazon                         |                                      | Not recorded                  |
| Etang de Cheylade                   |                                      | Not recorded                  |
| La Taphanel                         |                                      | Not recorded                  |
| Lac du Bouchet                      |                                      | Not recorded                  |
| Lac du Mont de Belier               |                                      | Not recorded                  |
| Le Grand Montarnu                   |                                      | Not recorded                  |
| Le Jolan                            |                                      | Not recorded                  |
| Le Miroir                           |                                      | Not recorded                  |
| Marais du Grang Chaumet             | Not recorded                         |                               |

|       |                                |               |
|-------|--------------------------------|---------------|
|       | Moulin de Prugnolas            | Not recorded  |
|       | Nataloup                       | Not recorded  |
|       | Peyre peat-bog                 | Not recorded  |
|       | Saint-Benoit-sur-Loire         | Not recorded  |
|       | Tourbière de Longeyroux        | Not recorded  |
|       | Tourbière de Roussy            | Not recorded  |
|       | Tourbière des Dauges           | Not recorded  |
|       | La Baforière                   | Not recorded  |
|       | Tourbière de Chabannes         | Not recorded  |
|       | Ancenis                        | Not recorded  |
|       | Basse-Ville                    | Not recorded  |
|       | Bois-Jésus                     | Not recorded  |
|       | Carquefou                      | Not recorded  |
|       | Caves d'Amont                  | Discontinuous |
|       | Cinq-Mars-la-Pile              | Discontinuous |
|       | Cordemais                      | Not recorded  |
|       | Ecours                         | Discontinuous |
|       | Jaunay                         | Discontinuous |
|       | La Caudelais                   | Discontinuous |
|       | La Grande Brousse              | Not recorded  |
|       | La Grange                      | Not recorded  |
|       | Le Gesvres                     | Discontinuous |
|       | Le Marais de la Perge          | Not recorded  |
|       | Marais de Champocé             | Not recorded  |
|       | Marais de Mazerolles           | Not recorded  |
|       | Marais de Munet                | Not recorded  |
|       | Marais de la Poupinière        | Not recorded  |
|       | Oudon                          | Not recorded  |
|       | Pas du Gu                      | Not recorded  |
|       | Petit Marais                   | Not recorded  |
|       | Petit Rocher                   | Discontinuous |
|       | Riabelais                      | Not recorded  |
|       | Saint Viaud Contin             | Not recorded  |
|       | Tourbière de Nay               | Not recorded  |
|       | Tourbière de Parçay-sur-Vienne | Not recorded  |
|       | Vertonne                       | Not recorded  |
|       | Clapeyret                      | Not recorded  |
|       | Col Luitel                     | Not recorded  |
|       | Col des Lauzes                 | Discontinuous |
|       | Correo                         | Not recorded  |
|       | Embouchac                      | Discontinuous |
|       | Etang d'Ouveillan              | Not recorded  |
|       | Grand Ratz le Pellet           | Not recorded  |
|       | Lac Long Inférieur             | Not recorded  |
|       | Lac des Boites                 | Not recorded  |
|       | Lac du Lauzon                  | Discontinuous |
|       | Lake Racou                     | Not recorded  |
|       | Lignin Lake                    | Continuous    |
|       | Pelléautier                    | Not recorded  |
|       | Peuil Peat Bog                 | Discontinuous |
|       | Pré Rond                       | Not recorded  |
|       | Sabbion                        | Not recorded  |
|       | Saint Hilaire du Rosier        | Not recorded  |
|       | Saint Julien de Ratz           | Not recorded  |
|       | Saint Sixte                    | Not recorded  |
|       | Tourbière de Gatimort          | Not recorded  |
|       | Tourbière de Mont Sec          | Not recorded  |
|       | Tourbière de la Lande          | Not recorded  |
|       | Tourbière du Peschio           | Not recorded  |
| Spain | Albufera Alcudia               | Not recorded  |
|       | Algendar                       | Discontinuous |
|       | Cala Galdana                   | Not recorded  |
|       | Cala'n Porter                  | Not recorded  |
|       | Antas                          | Not recorded  |
|       | Bajondillo                     | Not recorded  |
|       | Laguna Salada Chiprana         | Not recorded  |
|       | Navarrés                       | Not recorded  |
|       | Atxuri                         | Not recorded  |
|       | Cueto de la Avellanosa         | Not recorded  |
|       | Lago de Ajo                    | Not recorded  |
|       | Laguna de la Roya              | Not recorded  |
|       | PRD-4                          | Not recorded  |
|       | Puerto de Los Tornos           | Not recorded  |
|       | Saldropo                       | Not recorded  |
|       | Sanabria Marsh                 | Not recorded  |
|       | Quintanar de la Sierra         | Not recorded  |

|             |                     |                     |               |
|-------------|---------------------|---------------------|---------------|
| 6 - 5 Ka BP | Portugal            | Charco da Candieira | Not recorded  |
|             |                     | Lagoa Comprida 2    | Not recorded  |
|             |                     | Lagoa Travessa I    | Discontinuous |
|             | Syria               | Bouara              | Not recorded  |
|             |                     | Ghab                | Not recorded  |
|             | Israel              | Dead Sea-Ze'elim    | Not recorded  |
|             |                     | Birkat Ram          | Discontinuous |
|             |                     | Hula Valley         | Not recorded  |
|             | Iran                | Gomishan            | Not recorded  |
|             |                     | Lake Urmia          | Not recorded  |
|             |                     | Lake Zeribar        | Not recorded  |
|             | Georgia             | Gagra               | Not recorded  |
|             |                     | Lagodekhi           | Not recorded  |
|             |                     | Akhali Ateni        | Discontinuous |
|             | Albania             | Lake Maliq          | Not recorded  |
|             | Turkey              | Marmara Sea         | Not recorded  |
|             |                     | Abant Gölü          | Continuous    |
|             |                     | Yeniçaga Gölü       | Not recorded  |
|             |                     | Beyşehir Gölü I     | Not recorded  |
|             |                     | Göhlisar Gölü I     | Not recorded  |
|             |                     | Göhlisar Gölü II    | Not recorded  |
|             |                     | Hoyran Gölü         | Not recorded  |
|             |                     | Kararmik Batakligi  | Not recorded  |
|             |                     | Köycegiz Gölü       | Not recorded  |
|             |                     | Ova Gölü            | Not recorded  |
|             |                     | Pınarbasi           | Not recorded  |
|             |                     | Söğüt Gölü          | Not recorded  |
|             | Ladik Gölü          | In expansion        |               |
|             | Lake Van            | Discontinuous       |               |
| Greece      | Kastoria            | Not recorded        |               |
|             | Orestias            | Continuous          |               |
|             | Khimaditis III      | Not recorded        |               |
|             | Vegoritisi          | Not recorded        |               |
|             | Edessa              | Not recorded        |               |
|             | Litochoro           | Not recorded        |               |
|             | Tenaghi Philippon   | Not recorded        |               |
|             | Lerna               | Discontinuous       |               |
|             | Trikhonis           | Not recorded        |               |
|             | Ioannina I          | Discontinuous       |               |
|             | Ioannina II         | Not recorded        |               |
|             | Halos               | Not recorded        |               |
|             | Xinias              | Discontinuous       |               |
|             | Voukaria            | Not recorded        |               |
|             | Pertouli            | Not recorded        |               |
|             | Myrtoon Basin       | Continuous          |               |
| Bulgary     | Beliya Kanton       | Continuous          |               |
|             | Kupena II           | Not recorded        |               |
|             | Ribno I             | Discontinuous       |               |
|             | Popovo Ezero        | Not recorded        |               |
|             | Sozopol             | Continuous          |               |
|             | Arkutino I          | Discontinuous       |               |
|             | Arkutino II         | Discontinuous       |               |
|             | Black Sea South     | Not recorded        |               |
|             | Black Sea Southwest | Not recorded        |               |
|             | Black Sea West      | Continuous          |               |
|             | Duranunlak II       | Discontinuous       |               |
|             | Duranunlak I        | Not recorded        |               |
|             | Shabla-Ezeretz      | Discontinuous       |               |
|             | Varna I             | Discontinuous       |               |
|             | Varna II            | Discontinuous       |               |
|             | Mire Garvan         | Discontinuous       |               |
|             | Maleshevska         | Continuous          |               |
|             | Begbunar            | Continuous          |               |
|             | Tchokljovo Marsh    | Discontinuous       |               |
| Romania     | Vitoshia            | Not recorded        |               |
|             | Avrig I             | Not recorded        |               |
|             | Mohos               | Not recorded        |               |
|             | Luci                | Not recorded        |               |
|             | Bisoca              | Not recorded        |               |
|             | Calinease           | Not recorded        |               |
|             | Semenic             | Not recorded        |               |
|             | Stereoiu            | Not recorded        |               |
| Hungary     | Alsópáhok           | Not recorded        |               |
|             | Balaton Centre      | Not recorded        |               |
|             | Balaton Northeast   | Not recorded        |               |

|                |                                             |                               |
|----------------|---------------------------------------------|-------------------------------|
|                | Balaton Southwest                           | Not recorded                  |
|                | Nagy-Mohos                                  | Not recorded                  |
|                | Pötréte                                     | Not recorded                  |
|                | Szigliget                                   | Not recorded                  |
| Slovakia       | Bobrov                                      | Not recorded                  |
|                | Zlatnicka Dolina                            | Not recorded                  |
| Czech Republic | Dvur Ansov                                  | Not recorded                  |
|                | Vracov                                      | Not recorded                  |
|                | Palasiny                                    | Not recorded                  |
|                | Kozli                                       | Not recorded                  |
|                | Rezabinec                                   | Not recorded                  |
|                | Borkovicka blata                            | Not recorded                  |
|                | Branna                                      | Not recorded                  |
|                | Loucky                                      | Not recorded                  |
|                | Chrát                                       | Not recorded                  |
|                | Velka niva                                  | Not recorded                  |
|                | Malá niva                                   | Not recorded                  |
|                | Mrtv8 luh                                   | Not recorded                  |
|                | Strázenská slat                             | Not recorded                  |
|                | Komoranské jezero                           | Not recorded                  |
|                | <a href="#">Dolskym</a>                     | <a href="#">Discontinuous</a> |
|                | Tpské raseliniste Mire III                  | Not recorded                  |
| Ukraina        | Dovjok Swamp                                | Not recorded                  |
|                | Maly Podleski                               | Not recorded                  |
| Croatia        | Bokanjacko                                  | Not recorded                  |
| Poland         | Bledowo Lake                                | Not recorded                  |
|                | Giecz                                       | Not recorded                  |
|                | Lake Gosciaz                                | Not recorded                  |
|                | Lake Skrzetuszewskie                        | Not recorded                  |
|                | Slawsko                                     | Not recorded                  |
|                | Swietokrzyskie Lake                         | Not recorded                  |
|                | Cergowa Gora                                | Not recorded                  |
|                | Godziszewskie Lake                          | Not recorded                  |
|                | Lake Mikolajki                              | Not recorded                  |
|                | Puscizna Rekowianska                        | Not recorded                  |
| Austria        | Buntes Moor                                 | Not recorded                  |
|                | Dortmunder Hütte                            | Not recorded                  |
|                | Franz Senn-Hütte                            | Not recorded                  |
|                | Egelsee                                     | Not recorded                  |
|                | Gerlos                                      | Not recorded                  |
|                | Giering                                     | Not recorded                  |
|                | Grünau Moor                                 | Not recorded                  |
|                | Lindenmoos                                  | Not recorded                  |
|                | Mieminger See                               | Not recorded                  |
|                | Moor Alpenrose                              | Not recorded                  |
|                | Rotmoos Obergurgl                           | Not recorded                  |
|                | Schwarzsee Reschenscheideck                 | Not recorded                  |
|                | Schwemm                                     | Not recorded                  |
|                | Seefelder See                               | Not recorded                  |
|                | Zirbenwaldmoor                              | Not recorded                  |
|                | Wasenmoos beim Zellhof                      | Not recorded                  |
|                | Grosses Überling Schattseit-Moor            | Not recorded                  |
|                | Dürrenecksee-Moor                           | Not recorded                  |
|                | Fuchsschwanzmoos                            | Not recorded                  |
|                | Fuschlsee                                   | Not recorded                  |
| Germany        | Ahlequellmoor                               | Not recorded                  |
|                | Bruchberg                                   | Not recorded                  |
|                | Lüttersee                                   | Not recorded                  |
|                | Silberhohl                                  | Not recorded                  |
|                | Felchensee                                  | Not recorded                  |
|                | Löddigsee                                   | Not recorded                  |
|                | Wachel 3                                    | Not recorded                  |
|                | Brentenlohe                                 | Not recorded                  |
|                | Bruckmisse                                  | Not recorded                  |
|                | Glaswaldsee                                 | Not recorded                  |
|                | Herrenwiesser see                           | Not recorded                  |
|                | Durichenbergried                            | Not recorded                  |
|                | Feuenried                                   | Not recorded                  |
|                | Hornstaad-Bodensee                          | Not recorded                  |
|                | Huzenbacher See                             | Not recorded                  |
|                | Mindelsee                                   | Not recorded                  |
|                | Stierenmoos                                 | Not recorded                  |
|                | Wilder See beim Ruhstein                    | Not recorded                  |
|                | <a href="#">Wildseemoor bei Kaltenbrunn</a> | <a href="#">Discontinuous</a> |
| Switzerland    | Etang de la Gruère                          | Not recorded                  |
|                | Le Loclat                                   | Not recorded                  |



|        |                                         |                               |
|--------|-----------------------------------------|-------------------------------|
|        | Lobsigensee                             | Not recorded                  |
|        | Montilier                               | Not recorded                  |
|        | Aegelsee                                | Not recorded                  |
|        | Amsoldingensee                          | Not recorded                  |
|        | Bachalpsee                              | Not recorded                  |
|        | Hinterburgseeli                         | Not recorded                  |
|        | Hängstli                                | Not recorded                  |
|        | Linden                                  | Not recorded                  |
|        | Oberaar                                 | Not recorded                  |
|        | Rotsee                                  | Not recorded                  |
|        | Schwarzsee FR                           | Not recorded                  |
|        | Sägistalsee                             | Not recorded                  |
|        | Stiftenegg                              | Not recorded                  |
|        | <a href="#">Aletschwald</a>             | <a href="#">Discontinuous</a> |
|        | Alp Lüsga Belalp 1                      | Not recorded                  |
|        | Alpi di Robièi Val Bavona               | Not recorded                  |
|        | Alpi di Robièi Val Bavona Bodenprofil   | Not recorded                  |
|        | Bitsch-Naters                           | Not recorded                  |
|        | <a href="#">Eggen ob Blatten</a>        | <a href="#">Discontinuous</a> |
|        | Etang d'y Cor Montana                   | Not recorded                  |
|        | Etang de Luissel Bex                    | Not recorded                  |
|        | Gondo Alpjen                            | Not recorded                  |
|        | Greicheralp Riederalp                   | Not recorded                  |
|        | Grächen See                             | Not recorded                  |
|        | Hopschensee                             | Not recorded                  |
|        | <a href="#">Lac du Mont d'Orge Sion</a> | <a href="#">Discontinuous</a> |
|        | Mittlere Hellelen                       | Not recorded                  |
|        | Pillon Gsteig-Diablerets                | Not recorded                  |
|        | Simplon-Gampisch-Alter Spittel          | Not recorded                  |
|        | Wallbach Lenk                           | Not recorded                  |
|        | Mont Roux                               | Not recorded                  |
|        | Gamperfin                               | Not recorded                  |
|        | Creux de Croue                          | Not recorded                  |
|        | Motta Naluns                            | Not recorded                  |
|        | Praz Rodet                              | Not recorded                  |
|        | Bondone                                 | Not recorded                  |
|        | Dura-Moor                               | Not recorded                  |
|        | Malschötscher Hotter                    | Not recorded                  |
|        | Rinderplatz                             | Not recorded                  |
|        | Schwarzsee                              | Not recorded                  |
|        | Sommersüss                              | Not recorded                  |
|        | Grunsee                                 | Not recorded                  |
|        | Dossaccio Bormio                        | Not recorded                  |
|        | Lac de Villa                            | Not recorded                  |
|        | Lac du Verney-Dessus                    | Not recorded                  |
|        | Torveraz                                | Not recorded                  |
|        | <a href="#">Tourbière de Pilaz</a>      | <a href="#">Continuous</a>    |
|        | Tourbière de Santa Anna                 | Not recorded                  |
|        | Laghi dell'Orgials                      | Not recorded                  |
|        | Lago Piccolo di Avigliana               | Not recorded                  |
|        | Ortasee                                 | Not recorded                  |
|        | Refugio Mondovi                         | Not recorded                  |
|        | Selle di Carnino                        | Not recorded                  |
|        | <a href="#">Torbiera del Biecai</a>     | <a href="#">Discontinuous</a> |
|        | <a href="#">Lago della Costa</a>        | <a href="#">Continuous</a>    |
|        | Lago Padule                             | Not recorded                  |
|        | Lago dell'Accesa                        | Not recorded                  |
|        | Colfiorito                              | Not recorded                  |
|        | Lago Pratignano                         | Not recorded                  |
|        | Ospitale                                | Not recorded                  |
|        | Pavullo                                 | Not recorded                  |
|        | <a href="#">Lago di Martignano</a>      | <a href="#">Continuous</a>    |
|        | Lago di Vico                            | Not recorded                  |
|        | <a href="#">Lago Albano</a>             | <a href="#">Discontinuous</a> |
|        | <a href="#">Lago di Nemi</a>            | <a href="#">Discontinuous</a> |
|        | <a href="#">Central Adriatic Sea</a>    | <a href="#">Discontinuous</a> |
|        | Salerno Bay                             | Not recorded                  |
|        | Lago Grande di Monticchio LGM           | Not recorded                  |
| France | Aronde                                  | Not recorded                  |
|        | Auneau                                  | Not recorded                  |
|        | Baie de Seine estuary                   | Not recorded                  |
|        | Change-Glatinier                        | Not recorded                  |
|        | La Vie                                  | Not recorded                  |
|        | <a href="#">Le Fourneau</a>             | <a href="#">Discontinuous</a> |
|        | <a href="#">Marais de Lisle</a>         | <a href="#">Discontinuous</a> |
|        | Moulin de Thévalles                     | Not recorded                  |

|                                     |                               |
|-------------------------------------|-------------------------------|
| Pezou                               | Not recorded                  |
| Saint-Ursin                         | Not recorded                  |
| Serrent                             | Not recorded                  |
| Altenweiher                         | Not recorded                  |
| Hières sur Amby                     | Not recorded                  |
| Lake of Annecy                      | Not recorded                  |
| Loras                               | Not recorded                  |
| Lutinière                           | Not recorded                  |
| Moselotte                           | Not recorded                  |
| Tourbière de Narbief                | Not recorded                  |
| Le Grand Lemps                      | Not recorded                  |
| Tourbières des Granges des Chavants | Not recorded                  |
| <a href="#">Ampoix</a>              | <a href="#">Discontinuous</a> |
| Champ Gazou                         | Not recorded                  |
| Etang de Cheylade                   | Not recorded                  |
| La Taphanel                         | Not recorded                  |
| Lac du Bouchet                      | Not recorded                  |
| Lac du Mont de Belier               | Not recorded                  |
| Le Grand Montarnu                   | Not recorded                  |
| Le Jolan                            | Not recorded                  |
| Le Miroir                           | Not recorded                  |
| Marais du Grang Chaumet             | Not recorded                  |
| Moulin de Prugnolas                 | Not recorded                  |
| Nataloup                            | Not recorded                  |
| Peyre peat-bog                      | Not recorded                  |
| Saint-Benoit-sur-Loire              | Not recorded                  |
| Tourbière de Longeyroux             | Not recorded                  |
| Tourbière de Roussy                 | Not recorded                  |
| Tourbière des Dauges                | Not recorded                  |
| La Baforière                        | Not recorded                  |
| Tourbière de Chabannes              | Not recorded                  |
| <a href="#">Ancenis</a>             | <a href="#">Discontinuous</a> |
| Basse-Ville                         | Not recorded                  |
| Bois-Jésus                          | Not recorded                  |
| Carquefou                           | Not recorded                  |
| Caves d'Amont                       | Not recorded                  |
| Cinq-Mars-la-Pile                   | Not recorded                  |
| Cordemais                           | Not recorded                  |
| Corniche de Pail                    | Not recorded                  |
| <a href="#">Ecours</a>              | <a href="#">Discontinuous</a> |
| Jaunay                              | Not recorded                  |
| La Caudelais                        | Not recorded                  |
| La Grande Brousse                   | Not recorded                  |
| <a href="#">La Grange</a>           | <a href="#">Discontinuous</a> |
| <a href="#">La boire Torse</a>      | <a href="#">Discontinuous</a> |
| Le Gesvres                          | Not recorded                  |
| Le Marais de la Perge               | Not recorded                  |
| Marais de Champtocé                 | Not recorded                  |
| Marais de Mazerolles                | Not recorded                  |
| Marais de Munet                     | Not recorded                  |
| <a href="#">Marais de Méron</a>     | <a href="#">Discontinuous</a> |
| Marais de la Poupinière             | Not recorded                  |
| Oudon                               | Not recorded                  |
| Pas du Gu                           | Not recorded                  |
| Petit Marais                        | Not recorded                  |
| <a href="#">Petit Rocher</a>        | <a href="#">Discontinuous</a> |
| Riabelais                           | Not recorded                  |
| Saint Viaud Contin                  | Not recorded                  |
| Tourbière de Nay                    | Not recorded                  |
| Tourbière de Parçay-sur-Vienne      | Not recorded                  |
| Vertonne                            | Not recorded                  |
| Clapeyret                           | Not recorded                  |
| Col Luitel                          | Not recorded                  |
| Col des Lauzes                      | Not recorded                  |
| Correo                              | Not recorded                  |
| Embouchac                           | Not recorded                  |
| Etang d'Ouveillan                   | Not recorded                  |
| Grand Ratz le Pellet                | Not recorded                  |
| Lac Long Inférieur                  | Not recorded                  |
| Lac Saint Léger                     | Not recorded                  |
| <a href="#">Lac de Praver</a>       | <a href="#">Discontinuous</a> |
| Lac des Boites                      | Not recorded                  |
| <a href="#">Lac du Lauzon</a>       | <a href="#">Discontinuous</a> |
| Lake Racou                          | Not recorded                  |
| Pelléautier                         | Not recorded                  |
| Peuil Peat Bog                      | Not recorded                  |

|             |          |                                        |                               |
|-------------|----------|----------------------------------------|-------------------------------|
|             |          | Pré Rond                               | Not recorded                  |
|             |          | Sabbion                                | Not recorded                  |
|             |          | Saint Hilaire du Rosier                | Not recorded                  |
|             |          | Saint Julien de Ratz                   | Not recorded                  |
|             |          | <a href="#">Saint Sixte</a>            | <a href="#">Discontinuous</a> |
|             |          | Tourbière de Gatimort                  | Not recorded                  |
|             |          | Tourbière de Mont Sec                  | Not recorded                  |
|             |          | Tourbière de la Lande                  | Not recorded                  |
|             |          | Tourbière du Peschio                   | Not recorded                  |
|             | Spain    | Albufera Alcudia                       | Not recorded                  |
|             |          | <a href="#">Algendar</a>               | <a href="#">Discontinuous</a> |
|             |          | Cala Galdana                           | Not recorded                  |
|             |          | Cala'n Porter                          | Not recorded                  |
|             |          | Antas                                  | Not recorded                  |
|             |          | Bajondillo                             | Not recorded                  |
|             |          | Laguna Salada Chiprana                 | Not recorded                  |
|             |          | Navarrés                               | Not recorded                  |
|             |          | Atxuri                                 | Not recorded                  |
|             |          | Cueto de la Avellanosa                 | Not recorded                  |
|             |          | Lago de Ajo                            | Not recorded                  |
|             |          | Laguna de la Roya                      | Not recorded                  |
|             |          | <a href="#">PRD-4</a>                  | <a href="#">Discontinuous</a> |
|             |          | Puerto de Los Tornos                   | Not recorded                  |
|             |          | Saldropo                               | Not recorded                  |
|             |          | Sanabria Marsh                         | Not recorded                  |
|             |          | <a href="#">Quintanar de la Sierra</a> | <a href="#">Discontinuous</a> |
|             | Portugal | Charco da Candieira                    | Not recorded                  |
|             |          | Lagoa Comprida 2                       | Not recorded                  |
|             |          | Lagoa Travessa I                       | Not recorded                  |
|             | Syria    | Bouara                                 | Not recorded                  |
|             |          | Ghab                                   | Not recorded                  |
|             | Israel   | Dead Sea-Ze'elim                       | Not recorded                  |
|             |          | <a href="#">Birkat Ram</a>             | <a href="#">Discontinuous</a> |
|             |          | Lake Kinneret                          | Not recorded                  |
|             |          | <a href="#">Hula Valley</a>            | <a href="#">Discontinuous</a> |
|             | Iran     | Gomishan                               | Not recorded                  |
|             |          | Lake Urmia                             | Not recorded                  |
|             |          | Lake Zeribar                           | Not recorded                  |
|             | Georgia  | <a href="#">Gagra</a>                  | <a href="#">Discontinuous</a> |
|             |          | Lagodekhi                              | Not recorded                  |
|             |          | <a href="#">Akhali Ateni</a>           | <a href="#">Discontinuous</a> |
|             | Albania  | Lake Maliq                             | Not recorded                  |
| 5 - 4 Ka BP | Turkey   | <a href="#">Marmara Sea</a>            | <a href="#">Discontinuous</a> |
|             |          | <a href="#">Abant Gölü</a>             | <a href="#">Continuous</a>    |
|             |          | Yeniçaga Gölü                          | Not recorded                  |
|             |          | Beyschir Gölü I                        | Not recorded                  |
|             |          | <a href="#">Göhlisar Gölü I</a>        | <a href="#">Continuous</a>    |
|             |          | Göhlisar Gölü II                       | Not recorded                  |
|             |          | <a href="#">Hoyran Gölü</a>            | <a href="#">Discontinuous</a> |
|             |          | Kararmik Batakligi                     | Not recorded                  |
|             |          | <a href="#">Köycegiz Gölü</a>          | <a href="#">Discontinuous</a> |
|             |          | Ova Gölü                               | Not recorded                  |
|             |          | <a href="#">Pınarbasi</a>              | <a href="#">Continuous</a>    |
|             |          | Sögüt Gölü                             | Not recorded                  |
|             |          | <a href="#">Ladik Gölü</a>             | <a href="#">Continuous</a>    |
|             |          | <a href="#">Lake Van</a>               | <a href="#">Discontinuous</a> |
|             | Greece   | Kastoria                               | Not recorded                  |
|             |          | <a href="#">Orestias</a>               | <a href="#">Continuous</a>    |
|             |          | Khimaditis III                         | Not recorded                  |
|             |          | Vegoritis                              | Not recorded                  |
|             |          | <a href="#">Edessa</a>                 | <a href="#">Continuous</a>    |
|             |          | Litochoro                              | Not recorded                  |
|             |          | Tenaghi Philippon                      | Not recorded                  |
|             |          | <a href="#">Lerna</a>                  | <a href="#">Discontinuous</a> |
|             |          | Trikhonis                              | Not recorded                  |
|             |          | Ioannina I                             | Not recorded                  |
|             |          | Ioannina II                            | Not recorded                  |
|             |          | Halos                                  | Not recorded                  |
|             |          | <a href="#">Xinias</a>                 | <a href="#">In expansion</a>  |
|             |          | Voulkaria                              | Not recorded                  |
|             |          | <a href="#">Pertouli</a>               | <a href="#">Discontinuous</a> |
|             |          | <a href="#">Myrtoon Basin</a>          | <a href="#">Continuous</a>    |
|             | Bulgary  | <a href="#">Beliya Kanton</a>          | <a href="#">Continuous</a>    |
|             |          | Kupena II                              | Not recorded                  |
|             |          | <a href="#">Ribno I</a>                | <a href="#">Discontinuous</a> |

|                |                            |                      |
|----------------|----------------------------|----------------------|
|                | Popovo Ezero               | Not recorded         |
|                | <b>Sozopol</b>             | <b>Continuous</b>    |
|                | Arkutino I                 | Not recorded         |
|                | <b>Arkutino II</b>         | <b>Discontinuous</b> |
|                | Black Sea South            | Not recorded         |
|                | Black Sea Southwest        | Not recorded         |
|                | Duranunlak II              | Not recorded         |
|                | <b>Duranunlak I</b>        | <b>Discontinuous</b> |
|                | <b>Shabla-Ezeretz</b>      | <b>Discontinuous</b> |
|                | <b>Varna I</b>             | <b>Discontinuous</b> |
|                | <b>Varna II</b>            | <b>Discontinuous</b> |
|                | <b>Mire Garvan</b>         | <b>Discontinuous</b> |
|                | <b>Maleshevska</b>         | <b>Continuous</b>    |
|                | <b>Begbunar</b>            | <b>Continuous</b>    |
|                | Straldzha mire             | Not recorded         |
|                | <b>Tchokljovo Marsh</b>    | <b>Discontinuous</b> |
|                | Vitoshka                   | Not recorded         |
| Romania        | Avrig I                    | Not recorded         |
|                | Avrig II                   | Not recorded         |
|                | Mohos                      | Not recorded         |
|                | Luci                       | Not recorded         |
|                | Bisoca                     | Not recorded         |
|                | Calineasa                  | Not recorded         |
|                | Semenic                    | Not recorded         |
|                | Steregoiu                  | Not recorded         |
| Hungary        | Alsópáhok                  | Not recorded         |
|                | Balaton Centre             | Not recorded         |
|                | Balaton Northeast          | Not recorded         |
|                | Balaton Southwest          | Not recorded         |
|                | Nagy-Mohos                 | Not recorded         |
|                | Pötréte                    | Not recorded         |
|                | <b>Szigliget</b>           | <b>Continuous</b>    |
| Slovakia       | Bobrov                     | Not recorded         |
|                | Zlatnicka Dolina           | Not recorded         |
|                | Strbské pleso              | Not recorded         |
|                | <b>Tlstá hora</b>          | <b>Discontinuous</b> |
| Czech Republic | Dvur Ansov                 | Not recorded         |
|                | Vracov                     | Not recorded         |
|                | Palasiny                   | Not recorded         |
|                | Kozli                      | Not recorded         |
|                | Rezabinec                  | Not recorded         |
|                | Borkovicka blata           | Not recorded         |
|                | Branna                     | Not recorded         |
|                | <b>Loucky</b>              | <b>Discontinuous</b> |
|                | Chrást                     | Not recorded         |
|                | Velka niva                 | Not recorded         |
|                | Malá niva                  | Not recorded         |
|                | Mrtv8 luh                  | Not recorded         |
|                | Strázenská slat            | Not recorded         |
|                | Komoranské jezero          | Not recorded         |
|                | Dolskym                    | Not recorded         |
|                | Velky Ded                  | Not recorded         |
|                | Tpské raseliniste Mire III | Not recorded         |
| Ukraina        | Dovjok Swamp               | Not recorded         |
|                | Maly Podleski              | Not recorded         |
|                | Pecheniya                  | Not recorded         |
| Croatia        | Bokanjacko                 | Not recorded         |
| Poland         | Bledowo Lake               | Not recorded         |
|                | Giecz                      | Not recorded         |
|                | Lake Gosciarz              | Not recorded         |
|                | Lake Skrzetuszewskie       | Not recorded         |
|                | Slawsko                    | Not recorded         |
|                | Swietokrzyskie Lake        | Not recorded         |
|                | <b>Cergowa Gora</b>        | <b>Discontinuous</b> |
|                | Godziszewskie Lake         | Not recorded         |
|                | Lake Mikolajki             | Not recorded         |
|                | Puscizna Rekowianska       | Not recorded         |
| Austria        | Buntes Moor                | Not recorded         |
|                | Dortmunder Hütte           | Not recorded         |
|                | Franz Senn-Hütte           | Not recorded         |
|                | Egelsee                    | Not recorded         |
|                | Gerlos                     | Not recorded         |
|                | Giering                    | Not recorded         |
|                | Grünau Moor                | Not recorded         |
|                | Lindenmoos                 | Not recorded         |
|                | Mieminger See              | Not recorded         |

|             |                                             |                               |
|-------------|---------------------------------------------|-------------------------------|
|             | Moor Alpenrose                              | Not recorded                  |
|             | Rotmoos Obergurgl                           | Not recorded                  |
|             | Schwarzsee Reschenscheideck                 | Not recorded                  |
|             | Schwemm                                     | Not recorded                  |
|             | Seefelder See                               | Not recorded                  |
|             | Zirbenwaldmoor                              | Not recorded                  |
|             | Wasenmoos beim Zellhof                      | Not recorded                  |
|             | Grosses Überling Schattseit-Moor            | Not recorded                  |
|             | <a href="#">Dürrenecksee-Moor</a>           | <a href="#">Discontinuous</a> |
|             | Fuchsschwanzmoos                            | Not recorded                  |
| Germany     | Fuschlsee                                   | Not recorded                  |
|             | Ahlenmoor                                   | Not recorded                  |
|             | Ahlequellmoor                               | Not recorded                  |
|             | Bruchberg                                   | Not recorded                  |
|             | Lüttersee                                   | Not recorded                  |
|             | Silberhohl                                  | Not recorded                  |
|             | Felchensee                                  | Not recorded                  |
|             | Löddigsee                                   | Not recorded                  |
|             | Wachel 3                                    | Not recorded                  |
|             | Brentenlohe                                 | Not recorded                  |
|             | Bruckmisse                                  | Not recorded                  |
|             | Glaswaldsee                                 | Not recorded                  |
|             | Herrenwiesser see                           | Not recorded                  |
|             | Durchenbergried                             | Not recorded                  |
|             | Feuenried                                   | Not recorded                  |
|             | Gaienhofen                                  | Not recorded                  |
|             | <a href="#">Hornstaad-Bodensee</a>          | <a href="#">Discontinuous</a> |
|             | Huzenbacher See                             | Not recorded                  |
|             | Mindelsee                                   | Not recorded                  |
|             | Stierenmoos                                 | Not recorded                  |
|             | Wilder See beim Ruhestein                   | Not recorded                  |
|             | <a href="#">Wildseemoor bei Kaltenbronn</a> | <a href="#">Discontinuous</a> |
| Switzerland | Derrière les Embreux                        | Not recorded                  |
|             | Etang de la Gruère                          | Not recorded                  |
|             | Le Loclat                                   | Not recorded                  |
|             | Lobsigensee                                 | Not recorded                  |
|             | Montilier                                   | Not recorded                  |
|             | Aegelsee                                    | Not recorded                  |
|             | Amsoldingensee                              | Not recorded                  |
|             | Bachalpsee                                  | Not recorded                  |
|             | Hinterburgseeli                             | Not recorded                  |
|             | Hängstli                                    | Not recorded                  |
|             | Linden                                      | Not recorded                  |
|             | Oberaar                                     | Not recorded                  |
|             | Rotsee                                      | Not recorded                  |
|             | Schwarzsee FR                               | Not recorded                  |
|             | Sägistalsee                                 | Not recorded                  |
|             | Stiftenenegg                                | Not recorded                  |
|             | Aletschwald                                 | Not recorded                  |
|             | Alp Lüsga Belalp 1                          | Not recorded                  |
|             | Alpi di Robièi Val Bavona                   | Not recorded                  |
|             | Alpi di Robièi Val Bavona Bodenprofil       | Not recorded                  |
|             | Bitsch-Naters                               | Not recorded                  |
|             | Eggen ob Blatten                            | Not recorded                  |
|             | Etang d'y Cor Montana                       | Not recorded                  |
|             | <a href="#">Etang de Luissel Bex</a>        | <a href="#">Discontinuous</a> |
|             | <a href="#">Gondo Alphen</a>                | <a href="#">Discontinuous</a> |
|             | Greicheralp Riederalp                       | Not recorded                  |
|             | Grächen See                                 | Not recorded                  |
|             | Hopschensee                                 | Not recorded                  |
|             | Lac du Mont d'Orge Sion                     | Not recorded                  |
|             | Mittlere Hellelen                           | Not recorded                  |
|             | Pillon Gsteig-Diablerets                    | Not recorded                  |
|             | Simplon-Gampisch-Alter Spittel              | Not recorded                  |
|             | Wallbach Lenk                               | Not recorded                  |
|             | Mont Roux                                   | Not recorded                  |
|             | Gamperfin                                   | Not recorded                  |
|             | Creux de Croue                              | Not recorded                  |
|             | Motta Naluns                                | Not recorded                  |
| Italy       | Praz Rodet                                  | Not recorded                  |
|             | Bondone                                     | Not recorded                  |
|             | Dura-Moor                                   | Not recorded                  |
|             | Malschötscher Hotter                        | Not recorded                  |
|             | Rinderplatz                                 | Not recorded                  |
|             | Schwarzsee                                  | Not recorded                  |
|             | Sommersüss                                  | Not recorded                  |

|        |                                            |                      |
|--------|--------------------------------------------|----------------------|
|        | Grunsee                                    | Not recorded         |
|        | Dossaccio Bormio                           | Not recorded         |
|        | Lac de Villa                               | Not recorded         |
|        | Lac du Verney-Dessus                       | Not recorded         |
|        | Torveraz                                   | Not recorded         |
|        | <b>Tourbière de Pilaz</b>                  | <b>Continuous</b>    |
|        | Tourbière de Santa Anna                    | Not recorded         |
|        | Laghi dell'Orgials                         | Not recorded         |
|        | Lago Piccolo di Avigliana                  | Not recorded         |
|        | Ortasee                                    | Not recorded         |
|        | Refugio Mondovi                            | Not recorded         |
|        | Selle di Carnino                           | Not recorded         |
|        | Torbiera del Biecai                        | Not recorded         |
|        | <b>Lago della Costa</b>                    | <b>Continuous</b>    |
|        | Lago Padule                                | Not recorded         |
|        | Lago dell'Accesa                           | Not recorded         |
|        | Colfiorito                                 | Not recorded         |
|        | Lago Pratignano                            | Not recorded         |
|        | Ospitale                                   | Not recorded         |
|        | <b>Pavullo</b>                             | <b>Discontinuous</b> |
|        | <b>Lago di Martignano</b>                  | <b>Continuous</b>    |
|        | Lago di Vico                               | Not recorded         |
|        | <b>Lago Albano</b>                         | <b>Discontinuous</b> |
|        | <b>Lago di Nemi</b>                        | <b>Discontinuous</b> |
|        | <b>Central Adriatic Sea</b>                | <b>Discontinuous</b> |
|        | <b>Salerno Bay</b>                         | <b>Discontinuous</b> |
|        | Lago Grande di Monticchio LGM              | Not recorded         |
| France | Aronde                                     | Not recorded         |
|        | Auneau                                     | Not recorded         |
|        | Baie de Seine estuary                      | Not recorded         |
|        | Change-Glatinier                           | Not recorded         |
|        | La Vie                                     | Not recorded         |
|        | Le Fourneau                                | Not recorded         |
|        | Marais de Kerduel                          | Not recorded         |
|        | Marais de Lisle                            | Not recorded         |
|        | Marais de Marchesieux                      | Not recorded         |
|        | Mobeche Forest                             | Not recorded         |
|        | Moulin de Thévalles                        | Not recorded         |
|        | Pezou                                      | Not recorded         |
|        | Saint-Ursin                                | Not recorded         |
|        | Serrent                                    | Not recorded         |
|        | <b>Altenweiher</b>                         | <b>Discontinuous</b> |
|        | Hières sur Amby                            | Not recorded         |
|        | Lac Cerin                                  | Not recorded         |
|        | Lake of Annecy                             | Not recorded         |
|        | Loras                                      | Not recorded         |
|        | Lutinière                                  | Not recorded         |
|        | Moselotte                                  | Not recorded         |
|        | Tourbière de Narbief                       | Not recorded         |
|        | Le Grand Lemps                             | Not recorded         |
|        | <b>Tourbières des Granges des Chavants</b> | <b>Discontinuous</b> |
|        | Ampoix                                     | Not recorded         |
|        | Champ Gazon                                | Not recorded         |
|        | Etang de Cheylade                          | Not recorded         |
|        | La Taphanel                                | Not recorded         |
|        | Lac du Bouchet                             | Not recorded         |
|        | Lac du Mont de Belier                      | Not recorded         |
|        | Le Grand Montarnu                          | Not recorded         |
|        | Le Jolan                                   | Not recorded         |
|        | Le Miroir                                  | Not recorded         |
|        | Marais du Grang Chaumet                    | Not recorded         |
|        | Montbé                                     | Not recorded         |
|        | Moulin de Prugnolas                        | Not recorded         |
|        | Nataloup                                   | Not recorded         |
|        | Peyre peat-bog                             | Not recorded         |
|        | Port des Lamberts                          | Not recorded         |
|        | Saint-Benoit-sur-Loire                     | Not recorded         |
|        | Tourbière de Longeyroux                    | Not recorded         |
|        | Tourbière de Roussy                        | Not recorded         |
|        | Tourbière des Dauges                       | Not recorded         |
|        | La Baforière                               | Not recorded         |
|        | Tourbière de Chabannes                     | Not recorded         |
|        | <b>Ancenis</b>                             | <b>Discontinuous</b> |
|        | Basse-Ville                                | Not recorded         |
|        | Bois-Jésus                                 | Not recorded         |
|        | Carquefou                                  | Not recorded         |

|          |                                      |                               |
|----------|--------------------------------------|-------------------------------|
|          | Caves d'Amont                        | Not recorded                  |
|          | Cinq-Mars-la-Pile                    | Not recorded                  |
|          | Cordemais                            | Not recorded                  |
|          | Corniche de Pail                     | Not recorded                  |
|          | Ecours                               | Not recorded                  |
|          | Jaunay                               | Not recorded                  |
|          | La Caudelais                         | Not recorded                  |
|          | La Grande Brousse                    | Not recorded                  |
|          | La Grange                            | Not recorded                  |
|          | La boire Torse                       | Not recorded                  |
|          | Le Gesvres                           | Not recorded                  |
|          | Le Marais de la Perge                | Not recorded                  |
|          | Logne                                | Not recorded                  |
|          | Marais de Champtocé                  | Not recorded                  |
|          | Marais de Mazerolles                 | Not recorded                  |
|          | Marais de Munet                      | Not recorded                  |
|          | Marais de Méron                      | Not recorded                  |
|          | Marais de la Poupinière              | Not recorded                  |
|          | Marais des Bourbes                   | Not recorded                  |
|          | Oudon                                | Not recorded                  |
|          | Pas du Gu                            | Not recorded                  |
|          | Petit Marais                         | Not recorded                  |
|          | Riabelais                            | Not recorded                  |
|          | Saint Viaud Contin                   | Not recorded                  |
|          | Tourbière de Nay                     | Not recorded                  |
|          | Tourbière de Parçay-sur-Vienne       | Not recorded                  |
|          | Vertonne                             | Not recorded                  |
|          | Clapeyret                            | Not recorded                  |
|          | Col Luitel                           | Not recorded                  |
|          | Col des Lauzes                       | Not recorded                  |
|          | Correo                               | Not recorded                  |
|          | Embouchac                            | Not recorded                  |
|          | Etang d'Ouveillan                    | Not recorded                  |
|          | Fangeas                              | Not recorded                  |
|          | Grand Ratz le Pellet                 | Not recorded                  |
|          | Lac Long Inférieur                   | Not recorded                  |
|          | Lac Miroir                           | Not recorded                  |
|          | <a href="#">Lac Saint Léger</a>      | <a href="#">Discontinuous</a> |
|          | Lac de Praver                        | Not recorded                  |
|          | Lac des Boites                       | Not recorded                  |
|          | <a href="#">Lac du Lauzon</a>        | <a href="#">Discontinuous</a> |
|          | Lake Racou                           | Not recorded                  |
|          | Pelléautier                          | Not recorded                  |
|          | <a href="#">Peuil Peat Bog</a>       | <a href="#">Discontinuous</a> |
|          | Pré Rond                             | Not recorded                  |
|          | Sabbion                              | Not recorded                  |
|          | Saint Hilaire du Rosier              | Not recorded                  |
|          | <a href="#">Saint Julien de Ratz</a> | <a href="#">Continuous</a>    |
|          | <a href="#">Saint Sixte</a>          | <a href="#">Discontinuous</a> |
|          | Tourbière de Gatimort                | Not recorded                  |
|          | Tourbière de Mont Sec                | Not recorded                  |
|          | Tourbière de la Lande                | Not recorded                  |
|          | Tourbière du Peschio                 | Not recorded                  |
| Spain    | Albufera Alcudia                     | Not recorded                  |
|          | Algendar                             | Not recorded                  |
|          | Cala Galdana                         | Not recorded                  |
|          | <a href="#">Cala'n Porter</a>        | <a href="#">Discontinuous</a> |
|          | Antas                                | Not recorded                  |
|          | Bajondillo                           | Not recorded                  |
|          | Laguna Salada Chiprana               | Not recorded                  |
|          | <a href="#">Navarrés</a>             | <a href="#">Discontinuous</a> |
|          | Atxuri                               | Not recorded                  |
|          | Cueto de la Avellanosa               | Not recorded                  |
|          | Lago de Ajo                          | Not recorded                  |
|          | Laguna de la Roya                    | Not recorded                  |
|          | PRD-4                                | Not recorded                  |
|          | Puerto de Los Tornos                 | Not recorded                  |
|          | Saldropo                             | Not recorded                  |
|          | Sanabria Marsh                       | Not recorded                  |
|          | <a href="#">Peña Negra</a>           | <a href="#">Discontinuous</a> |
|          | Quintanar de la Sierra               | Not recorded                  |
|          | Salada Pequeña                       | Not recorded                  |
| Portugal | Charco da Candieira                  | Not recorded                  |
|          | <a href="#">Lagoa Comprida 2</a>     | <a href="#">Discontinuous</a> |
|          | Lagoa Travessa I                     | Not recorded                  |
| Syria    | Bouara                               | Not recorded                  |

|               |                     |                    |               |
|---------------|---------------------|--------------------|---------------|
| 4 – 3.5 Ka BP | Israel              | Ghab               | Not recorded  |
|               |                     | Dead Sea-Ze'elim   | Not recorded  |
|               |                     | Birkat Ram         | Discontinuous |
|               | Iran                | Lake Kinneret      | Not recorded  |
|               |                     | Hula Valley        | Discontinuous |
|               |                     | Gomishan           | Not recorded  |
|               | Georgia             | Lake Urmia         | Not recorded  |
|               |                     | Lake Zeribar       | Not recorded  |
|               |                     | Maharlou Lake      | Discontinuous |
|               | Albania             | Adange             | Not recorded  |
|               |                     | Gagra              | Not recorded  |
|               |                     | Lagodekhi          | Not recorded  |
|               | Turkey              | Supsa River        | Not recorded  |
|               |                     | Imera lake         | Not recorded  |
|               |                     | Lake Maliq         | Not recorded  |
|               | Greece              | Lake Manyas        | Not recorded  |
|               |                     | Marmara Sea        | Discontinuous |
|               |                     | Abant Gölü         | Continuous    |
|               |                     | Yeniçaga Gölü      | Discontinuous |
|               |                     | Beyşehir Gölü I    | Continuous    |
|               |                     | Göhlisar Gölü I    | Continuous    |
|               |                     | Göhlisar Gölü II   | Not recorded  |
|               |                     | Hoyran Gölü        | Discontinuous |
|               |                     | Kararmik Batakligi | Not recorded  |
|               |                     | Köycegiz Gölü      | Not recorded  |
|               |                     | Ova Gölü           | Continuous    |
|               |                     | Pinarbasi          | Continuous    |
|               |                     | Sögüt Gölü         | Not recorded  |
|               |                     | Ladik Gölü         | Continuous    |
|               |                     | Lake Van           | Discontinuous |
|               |                     | Kournas            | Not recorded  |
|               |                     | Elatia-Rhodopes    | Continuous    |
|               |                     | Kastoria           | Not recorded  |
|               |                     | Orestias           | Continuous    |
|               |                     | Khimaditis III     | Not recorded  |
|               |                     | Vegoritits         | Not recorded  |
|               |                     | Edessa             | Continuous    |
|               |                     | Litochoro          | Not recorded  |
|               |                     | Tenaghi Philippon  | Not recorded  |
|               |                     | Lerna              | Not recorded  |
|               |                     | Trikhonis          | Not recorded  |
|               |                     | Ioannina I         | Not recorded  |
| Ioannina II   |                     | Not recorded       |               |
| Halos         |                     | Discontinuous      |               |
| Xinias        |                     | Continuous         |               |
| Voukaria      |                     | Not recorded       |               |
| Pertouli      |                     | Not recorded       |               |
| Myrtoon Basin | Continuous          |                    |               |
| Bulgary       | Beliya Kanton       | Continuous         |               |
| Romania       | Kupena II           | Not recorded       |               |
|               | Ribno I             | Discontinuous      |               |
|               | Popovo Ezero        | Not recorded       |               |
|               | Mutorog             | Not recorded       |               |
|               | Sozopol             | Continuous         |               |
|               | Arkutino I          | Not recorded       |               |
|               | Arkutino II         | Discontinuous      |               |
|               | Black Sea South     | Not recorded       |               |
|               | Black Sea Southwest | Not recorded       |               |
|               | Duranunlak II       | Not recorded       |               |
|               | Duranunlak I        | Not recorded       |               |
|               | Shabla-Ezeretz      | Discontinuous      |               |
|               | Varna I             | Discontinuous      |               |
|               | Varna II            | Discontinuous      |               |
|               | Mire Garvan         | Not recorded       |               |
|               | Maleshevska         | Continuous         |               |
|               | Osogovo             | Continuous         |               |
|               | Begbunar            | Continuous         |               |
|               | Straldzha mire      | Discontinuous      |               |
|               | Tchokljovo Marsh    | Discontinuous      |               |
|               | Vitosha             | Not recorded       |               |
|               | Avrig I             | Not recorded       |               |
| Avrig II      | Not recorded        |                    |               |
| Mohos         | Not recorded        |                    |               |
| Luci          | Not recorded        |                    |               |
| Bisoca        | Not recorded        |                    |               |



|                                  |                      |                            |               |
|----------------------------------|----------------------|----------------------------|---------------|
|                                  | Calinease            | Not recorded               |               |
|                                  | Semenic              | Not recorded               |               |
|                                  | Stereioiu            | Not recorded               |               |
| Hungary                          | Alsópáhok            | Not recorded               |               |
|                                  | Balaton Centre       | Discontinuous              |               |
|                                  | Balaton Northeast    | Discontinuous              |               |
|                                  | Balaton Southwest    | Not recorded               |               |
|                                  | Nagy-Mohos           | Discontinuous              |               |
|                                  | Pölöske              | Not recorded               |               |
|                                  | Pötréte              | Not recorded               |               |
|                                  | Szigliget            | Continuous                 |               |
| Slovakia                         | Bobrov               | Not recorded               |               |
|                                  | Zlatnicka Dolina     | Not recorded               |               |
|                                  | Strbské pleso        | Not recorded               |               |
| Czech Republic                   | Tlístá hora          | Not recorded               |               |
|                                  | Dvur Ansov           | Discontinuous              |               |
|                                  | Olbramovice          | Not recorded               |               |
|                                  | Vracov               | Not recorded               |               |
|                                  | Palasiny             | Not recorded               |               |
|                                  | Kozli                | Not recorded               |               |
|                                  | Rezabinec            | Not recorded               |               |
|                                  | Borkovicka blata     | Not recorded               |               |
|                                  | Branna               | Not recorded               |               |
|                                  | Loucky               | Not recorded               |               |
|                                  | Chrást               | Not recorded               |               |
|                                  | Velka niva           | Not recorded               |               |
|                                  | Malá niva            | Not recorded               |               |
|                                  | Mrtv8 luh            | Not recorded               |               |
|                                  | Stráženská slat      | Not recorded               |               |
|                                  | Komoranské jezero    | Not recorded               |               |
|                                  | Dolskym              | Not recorded               |               |
|                                  | Velky Ded            | Not recorded               |               |
|                                  |                      | Tpské raseliniste Mire II  | Discontinuous |
|                                  |                      | Tpské raseliniste Mire III | Not recorded  |
|                                  | Ukraina              | Dovjok Swamp               | Not recorded  |
|                                  |                      | Maly Podleski              | Not recorded  |
|                                  |                      | Pecheniya                  | Not recorded  |
| Croatia                          | Bokanjacko           | Not recorded               |               |
| Poland                           | Bledowo Lake         | Not recorded               |               |
|                                  | Giecz                | Not recorded               |               |
|                                  | Lake Gosciuz         | Not recorded               |               |
|                                  | Lake Skrzetuszewskie | Not recorded               |               |
|                                  | Slawsko              | Not recorded               |               |
|                                  | Swietokrzyskie Lake  | Not recorded               |               |
|                                  | Cergowa Gora         | Not recorded               |               |
|                                  | Godziszewskie Lake   | Not recorded               |               |
|                                  | Lake Mikolajki       | Not recorded               |               |
|                                  | Puscizna Rekowianska | Not recorded               |               |
|                                  | Austria              | Buntes Moor                | Not recorded  |
|                                  |                      | Dortmunder Hütte           | Not recorded  |
|                                  |                      | Franz Senn-Hütte           | Not recorded  |
|                                  |                      | Egelsee                    | Not recorded  |
|                                  |                      | Gerlos                     | Not recorded  |
|                                  |                      | Giering                    | Not recorded  |
| Grünau Moor                      |                      | Not recorded               |               |
| Lindenmoos                       |                      | Not recorded               |               |
| Mieminger See                    |                      | Not recorded               |               |
| Moor Alpenrose                   |                      | Not recorded               |               |
| Rotmoos Obergurgl                |                      | Not recorded               |               |
| Schwarzsee Reschenscheideck      |                      | Not recorded               |               |
| Schwemm                          |                      | Not recorded               |               |
| Seefelder See                    |                      | Not recorded               |               |
| Zirbenwaldmoor                   |                      | Not recorded               |               |
| Wasenmoos beim Zellhof           |                      | Not recorded               |               |
| Grosses Überling Schattseit-Moor |                      | Not recorded               |               |
|                                  | Dürrenecksee-Moor    | Discontinuous              |               |
|                                  | Fuchsschwanzmoos     | Not recorded               |               |
|                                  | Fuschlsee            | Not recorded               |               |
| Germany                          | Ahlenmoor            | Not recorded               |               |
|                                  | Ahlequellmoor        | Not recorded               |               |
|                                  | Bruchberg            | Not recorded               |               |
|                                  | Lüttersee            | Not recorded               |               |
|                                  | Silberhohl           | Not recorded               |               |
|                                  | Felchensee           | Not recorded               |               |
|                                  | Löddigsee            | Not recorded               |               |
|                                  | Wachel 3             | Not recorded               |               |

|             |                                       |               |
|-------------|---------------------------------------|---------------|
|             | Brentenlohe                           | Not recorded  |
|             | Bruckmisse                            | Not recorded  |
|             | Glaswaldsee                           | Not recorded  |
|             | Herrenwiesser see                     | Not recorded  |
|             | Durchenbergried                       | Not recorded  |
|             | Feuenried                             | Not recorded  |
|             | Gaienhofen                            | Not recorded  |
|             | Hornstaad-Bodensee                    | Not recorded  |
|             | Huzenbacher See                       | Not recorded  |
|             | Mindelsee                             | Not recorded  |
|             | Steerenmoos                           | Discontinuous |
|             | Wilder See beim Ruhestein             | Not recorded  |
|             | Wildseemoor bei Kaltenbronn           | Discontinuous |
| Switzerland | Derrière les Embreux                  | Not recorded  |
|             | Etang de la Gruère                    | Not recorded  |
|             | Le Loclat                             | Not recorded  |
|             | Lobsigensee                           | Not recorded  |
|             | Montilier                             | Not recorded  |
|             | Aegelsee                              | Not recorded  |
|             | Amsoldingerseesee                     | Not recorded  |
|             | Bachalpsee                            | Not recorded  |
|             | Hinterburgseeli                       | Not recorded  |
|             | Hängstli                              | Not recorded  |
|             | Linden                                | Not recorded  |
|             | Oberaar                               | Not recorded  |
|             | Rotsee                                | Not recorded  |
|             | Schwarzsee FR                         | Not recorded  |
|             | Sägistalsee                           | Not recorded  |
|             | Stiftenenegg                          | Not recorded  |
|             | Aletschwald                           | Not recorded  |
|             | Alp Lüsga Belalp 1                    | Not recorded  |
|             | Alpi di Robièi Val Bavona             | Not recorded  |
|             | Alpi di Robièi Val Bavona Bodenprofil | Not recorded  |
|             | Bitsch-Naters                         | Not recorded  |
|             | Eggen ob Blatten                      | Not recorded  |
|             | Etang d'y Cor Montana                 | Not recorded  |
|             | Etang de Luissel Bex                  | Not recorded  |
|             | Gondo Alpjen                          | Not recorded  |
|             | Greicheralp Riederalp                 | Discontinuous |
|             | Grächen See                           | Not recorded  |
|             | Hopschensee                           | Not recorded  |
|             | Lac du Mont d'Orge Sion               | Not recorded  |
|             | Mittlere Hellelen                     | Not recorded  |
|             | Pillon Gsteig-Diablerets              | Not recorded  |
|             | Simplon-Gampisch-Alter Spittel        | Not recorded  |
|             | Wallbach Lenk                         | Not recorded  |
|             | Mont Roux                             | Not recorded  |
|             | Gamperfin                             | Not recorded  |
|             | Creux de Croue                        | Not recorded  |
|             | Motta Naluns                          | Not recorded  |
|             | Praz Rodet                            | Not recorded  |
| Italy       | Bondone                               | Continuous    |
|             | Dura-Moor                             | Not recorded  |
|             | Malschötscher Hotter                  | Not recorded  |
|             | Rinderplatz                           | Not recorded  |
|             | Schwarzsee                            | Not recorded  |
|             | Sommersüss                            | Not recorded  |
|             | Grunsee                               | Not recorded  |
|             | Dossaccio Bormio                      | Not recorded  |
|             | Lac de Villa                          | Not recorded  |
|             | Lac du Verney-Dessus                  | Not recorded  |
|             | Torveraz                              | Not recorded  |
|             | Tourbière de Pilaz                    | Continuous    |
|             | Tourbière de Santa Anna               | Not recorded  |
|             | Laghi dell'Orgials                    | Not recorded  |
|             | Lago Piccolo di Avigliana             | Not recorded  |
|             | Ortasee                               | Discontinuous |
|             | Refugio Mondovi                       | Not recorded  |
|             | Selle di Carnino                      | Not recorded  |
|             | Torbiera del Biecai                   | Not recorded  |
|             | Lago della Costa                      | Continuous    |
|             | Lago Padule                           | Not recorded  |
|             | Lago dell'Accesa                      | Not recorded  |
|             | Colfiorito                            | Discontinuous |
|             | Lago Pratignano                       | Discontinuous |
|             | Ospitale                              | Not recorded  |

|        |                                     |               |
|--------|-------------------------------------|---------------|
|        | Pavullo                             | Discontinuous |
|        | Lago di Martignano                  | Continuous    |
|        | Lago di Vico                        | Not recorded  |
|        | Lago Albano                         | Discontinuous |
|        | Lago di Nemi                        | Discontinuous |
|        | Central Adriatic Sea                | Discontinuous |
|        | Salerno Bay                         | Discontinuous |
|        | Lago Grande di Monticchio LGM       | Not recorded  |
| France | Aronde                              | Not recorded  |
|        | Auneau                              | Not recorded  |
|        | Baie de Seine estuary               | Not recorded  |
|        | Change-Glatinier                    | Not recorded  |
|        | La Vie                              | Not recorded  |
|        | Le Fourneau                         | Discontinuous |
|        | Marais de Kerdual                   | Discontinuous |
|        | Marais de Lisle                     | Discontinuous |
|        | Marais de Marchesieux               | Not recorded  |
|        | Mobeche Forest                      | Not recorded  |
|        | Moulin de Thévalles                 | Not recorded  |
|        | Pezou                               | Not recorded  |
|        | Saint-Ursin                         | Not recorded  |
|        | Serrent                             | Not recorded  |
|        | Altenweiher                         | Not recorded  |
|        | Grozon                              | Not recorded  |
|        | Hières sur Amby                     | Not recorded  |
|        | Lac Cerin                           | Not recorded  |
|        | Lac de Clairvaux                    | Not recorded  |
|        | Lake of Annecy                      | Not recorded  |
|        | Loras                               | Not recorded  |
|        | Lutinière                           | Not recorded  |
|        | Moselotte                           | Not recorded  |
|        | Tourbière de Narbief                | Not recorded  |
|        | Le Grand Lemps                      | Not recorded  |
|        | Tourbières des Granges des Chavants | Not recorded  |
|        | Ampoix                              | Not recorded  |
|        | Champ Gazon                         | Discontinuous |
|        | Etang de Cheylade                   | Not recorded  |
|        | La Taphanel                         | Not recorded  |
|        | Lac du Bouchet                      | Not recorded  |
|        | Lac du Mont de Belier               | Not recorded  |
|        | Le Grand Montarnu                   | Not recorded  |
|        | Le Jolan                            | Not recorded  |
|        | Le Miroir                           | Not recorded  |
|        | Marais du Grang Chaumet             | In expansion  |
|        | Montbé                              | Not recorded  |
|        | Moulin de Prugnolas                 | Not recorded  |
|        | Nataloup                            | Not recorded  |
|        | Peyre peat-bog                      | Not recorded  |
|        | Port des Lamberts                   | Not recorded  |
|        | Saint-Benoit-sur-Loire              | Not recorded  |
|        | Tourbière de Longeyroux             | Not recorded  |
|        | Tourbière de Roussy                 | Not recorded  |
|        | Tourbière des Dauges                | Not recorded  |
|        | La Baforière                        | Not recorded  |
|        | Tourbière de Chabannes              | Not recorded  |
|        | Ancenis                             | Not recorded  |
|        | Basse-Ville                         | Not recorded  |
|        | Bois-Jésus                          | Not recorded  |
|        | Carquefou                           | Not recorded  |
|        | Caves d'Amont                       | Not recorded  |
|        | Cinq-Mars-la-Pile                   | Not recorded  |
|        | Cordemais                           | Not recorded  |
|        | Corniche de Pail                    | Not recorded  |
|        | Ecours                              | Discontinuous |
|        | Jaunay                              | Not recorded  |
|        | La Bergerie en Charron              | Not recorded  |
|        | La Caudelais                        | Discontinuous |
|        | La Grande Brousse                   | Not recorded  |
|        | La Grange                           | Not recorded  |
|        | La boire Torse                      | Discontinuous |
|        | Le Gesvres                          | Not recorded  |
|        | Le Marais de la Perge               | Not recorded  |
|        | Logne                               | Not recorded  |
|        | Marais de Champtocé                 | Not recorded  |
|        | Marais de Mazerolles                | Not recorded  |
|        | Marais de Munet                     | Not recorded  |

|          |                                      |                               |
|----------|--------------------------------------|-------------------------------|
|          | Marais de Méron                      | Not recorded                  |
|          | Marais de la Poupinière              | Not recorded                  |
|          | Marais des Bourbes                   | Not recorded                  |
|          | Oudon                                | Not recorded                  |
|          | Pas du Gu                            | Not recorded                  |
|          | Petit Marais                         | Not recorded                  |
|          | Ribelais                             | Not recorded                  |
|          | Saint Viaud Contin                   | Not recorded                  |
|          | Tourbière de Nay                     | Not recorded                  |
|          | Tourbière de Parçay-sur-Vienne       | Not recorded                  |
|          | Vertonne                             | Not recorded                  |
|          | Clapeyret                            | Not recorded                  |
|          | Col Luitel                           | Not recorded                  |
|          | Col des Lauzes                       | Not recorded                  |
|          | Correo                               | Not recorded                  |
|          | Embouchac                            | Not recorded                  |
|          | <a href="#">Etang d'Ouveillan</a>    | <a href="#">Discontinuous</a> |
|          | Fangeas                              | Not recorded                  |
|          | Grand Ratz le Pellet                 | Not recorded                  |
|          | Lac Long Inférieur                   | Not recorded                  |
|          | <a href="#">Lac Miroir</a>           | <a href="#">Discontinuous</a> |
|          | Lac Saint Léger                      | Not recorded                  |
|          | Lac de Praver                        | Not recorded                  |
|          | Lac des Boites                       | Not recorded                  |
|          | Lac du Lauzon                        | Not recorded                  |
|          | Lake Racou                           | Not recorded                  |
|          | Pelléautier                          | Not recorded                  |
|          | Pré Rond                             | Not recorded                  |
|          | Sabbion                              | Not recorded                  |
|          | Saint Hilaire du Rosier              | Not recorded                  |
|          | <a href="#">Saint Julien de Ratz</a> | <a href="#">Continuous</a>    |
|          | <a href="#">Saint Sixte</a>          | <a href="#">Discontinuous</a> |
|          | Tourbière de Gatimort                | Not recorded                  |
|          | Tourbière de Mont Sec                | Not recorded                  |
|          | Tourbière de la Lande                | Not recorded                  |
|          | Tourbière du Peschio                 | Not recorded                  |
| Spain    | Albufera Alcudia                     | Not recorded                  |
|          | <a href="#">Algendar</a>             | <a href="#">Discontinuous</a> |
|          | Cala Galdana                         | Not recorded                  |
|          | Cala'n Porter                        | Not recorded                  |
|          | Antas                                | Not recorded                  |
|          | Laguna Salada Chiprana               | Not recorded                  |
|          | Navarrés                             | Not recorded                  |
|          | Atxuri                               | Not recorded                  |
|          | Cueto de la Avellanosa               | Not recorded                  |
|          | <a href="#">Lago de Ajo</a>          | <a href="#">Discontinuous</a> |
|          | Laguna de la Roya                    | Not recorded                  |
|          | PRD-4                                | Not recorded                  |
|          | Puerto de Los Tornos                 | Not recorded                  |
|          | Saldropo                             | Not recorded                  |
|          | <a href="#">Sanabria Marsh</a>       | <a href="#">Discontinuous</a> |
|          | El Payo                              | Not recorded                  |
|          | <a href="#">Peña Negra</a>           | <a href="#">Discontinuous</a> |
|          | Quintanar de la Sierra               | Not recorded                  |
|          | Salada Pequeña                       | Not recorded                  |
| Portugal | Charco da Candieira                  | Not recorded                  |
|          | <a href="#">Lagoa Comprida 2</a>     | <a href="#">Discontinuous</a> |
|          | Lagoa Travessa I                     | Not recorded                  |
| Syria    | Bouara                               | Not recorded                  |
|          | <a href="#">Ghab</a>                 | <a href="#">Discontinuous</a> |
| Israel   | Dead Sea-Ze'elim                     | Not recorded                  |
|          | <a href="#">Birkat Ram</a>           | <a href="#">Discontinuous</a> |
|          | Lake Kinneret                        | Not recorded                  |
|          | <a href="#">Hula Valley</a>          | <a href="#">Discontinuous</a> |
| Iran     | Gomishan                             | Not recorded                  |
|          | Lake Almalou                         | Not recorded                  |
|          | <a href="#">Lake Urmia</a>           | <a href="#">In expansion</a>  |
|          | Lake Zeribar                         | Not recorded                  |
|          | Maharlou Lake                        | Not recorded                  |
| Georgia  | <a href="#">Adange</a>               | <a href="#">Discontinuous</a> |
|          | Gagra                                | Not recorded                  |
|          | Lagodekhi                            | Not recorded                  |
|          | Supsa River                          | Not recorded                  |
|          | Imera lake                           | Not recorded                  |
| Albania  | <a href="#">Lake Maliq</a>           | <a href="#">Discontinuous</a> |

|                  |                     |               |
|------------------|---------------------|---------------|
| Turkey           | Lake Manyas         | Not recorded  |
|                  | Marmara Sea         | Discontinuous |
|                  | Abant Gölü          | Continuous    |
|                  | Yeniçaga Gölü       | Not recorded  |
|                  | Beyşehir Gölü I     | Continuous    |
|                  | Göhlisar Gölü I     | Continuous    |
|                  | Göhlisar Gölü II    | Not recorded  |
|                  | Hoyran Gölü         | Not recorded  |
|                  | Kararmik Batakligi  | Discontinuous |
|                  | Köycegiz Gölü       | Discontinuous |
|                  | Ova Gölü            | Continuous    |
|                  | Pınarbasi           | Continuous    |
|                  | Söğüt Gölü          | Not recorded  |
|                  | Ladik Gölü          | Continuous    |
| Lake Van         | Discontinuous       |               |
| Greece           | Kournas             | Not recorded  |
|                  | Paiko               | Not recorded  |
|                  | Elatia-Rhodopes     | Continuous    |
|                  | Kastoria            | Not recorded  |
|                  | Orestias            | Continuous    |
|                  | Khimaditis III      | Not recorded  |
|                  | Vegoritis           | Not recorded  |
|                  | Edessa              | Continuous    |
|                  | Litochoro           | Not recorded  |
|                  | Tenaghi Philippon   | Not recorded  |
|                  | Lerna               | Not recorded  |
|                  | Trikhonis           | Not recorded  |
|                  | Ioannina I          | Not recorded  |
|                  | Ioannina II         | Not recorded  |
|                  | Halos               | Not recorded  |
|                  | Xinias              | Continuous    |
|                  | Voukaria            | Not recorded  |
| Bulgary          | Pertouli            | Not recorded  |
|                  | Myrtoon Basin       | Continuous    |
|                  | Beliya Kanton       | Continuous    |
|                  | Kupena II           | Not recorded  |
|                  | Ribno I             | Not recorded  |
|                  | Popovo Ezero        | Not recorded  |
|                  | Mutorog             | Discontinuous |
|                  | Trilistnika         | Continuous    |
|                  | Sozopol             | Continuous    |
|                  | Arkutino I          | Discontinuous |
|                  | Arkutino II         | Discontinuous |
|                  | Black Sea South     | Not recorded  |
|                  | Black Sea Southwest | Not recorded  |
|                  | Duranunlak II       | Not recorded  |
|                  | Duranunlak I        | Not recorded  |
|                  | Shabla-Ezeretz      | Discontinuous |
|                  | Varna I             | Not recorded  |
| Varna II         | Discontinuous       |               |
| Mire Garvan      | Not recorded        |               |
| Maleshevska      | Continuous          |               |
| Osoгово          | Continuous          |               |
| Begbunar         | Continuous          |               |
| Sredna Gora      | Not recorded        |               |
| Straldzha mire   | Not recorded        |               |
| Tchokljovo Marsh | Not recorded        |               |
| Vitosha          | Not recorded        |               |
| Romania          | Avrig I             | Discontinuous |
|                  | Avrig II            | Not recorded  |
|                  | Mohos               | Not recorded  |
|                  | Luci                | Not recorded  |
|                  | Bisoca              | Not recorded  |
|                  | Calinease           | Not recorded  |
|                  | Semic               | Discontinuous |
| Stereoiu         | Not recorded        |               |
| Hungary          | Alsópáhok           | Not recorded  |
|                  | Balaton Centre      | Discontinuous |
|                  | Balaton Northeast   | Discontinuous |
|                  | Balaton Southwest   | Not recorded  |
|                  | Nagy-Mohos          | Not recorded  |
|                  | Pölöske             | Not recorded  |
|                  | Pötréte             | Not recorded  |
| Szigliget        | Continuous          |               |
| Slovakia         | Bobrov              | Not recorded  |
|                  | Zlatnicka Dolina    | Not recorded  |

|                |                                        |                               |
|----------------|----------------------------------------|-------------------------------|
|                | Strbské pleso                          | Not recorded                  |
|                | Tlístá hora                            | Not recorded                  |
| Czech Republic | Dvur Ansov                             | Not recorded                  |
|                | <a href="#">Olbramovice</a>            | <a href="#">Discontinuous</a> |
|                | <a href="#">Vracov</a>                 | <a href="#">Discontinuous</a> |
|                | Palasiny                               | Not recorded                  |
|                | Kozli                                  | Not recorded                  |
|                | Rezabinec                              | Not recorded                  |
|                | Borkovicka blata                       | Not recorded                  |
|                | <a href="#">Branna</a>                 | <a href="#">Discontinuous</a> |
|                | Loucky                                 | Not recorded                  |
|                | Chrást                                 | Not recorded                  |
|                | Velka niva                             | Not recorded                  |
|                | Malá niva                              | Not recorded                  |
|                | Mrtv8 luh                              | Not recorded                  |
|                | Stráženská slat                        | Not recorded                  |
|                | Komoranské jezero                      | Not recorded                  |
|                | Dolskym                                | Not recorded                  |
|                | Velky Ded                              | Not recorded                  |
|                | Pancavská louka                        | Not recorded                  |
|                | Tpské raseliniste Mire II              | Not recorded                  |
|                | Tpské raseliniste Mire III             | Not recorded                  |
| Ukraina        | Dovjok Swamp                           | Not recorded                  |
|                | Maly Podleski                          | Not recorded                  |
|                | <a href="#">Pecheniya</a>              | <a href="#">Discontinuous</a> |
| Croatia        | Bokanjacko                             | Not recorded                  |
|                | <a href="#">Mljet</a>                  | <a href="#">Continuous</a>    |
| Poland         | Bledowo Lake                           | Not recorded                  |
|                | Giecz                                  | Not recorded                  |
|                | Lake Gosciaz                           | Not recorded                  |
|                | Lake Skrzetuszewskie                   | Not recorded                  |
|                | Slawsko                                | Not recorded                  |
|                | Swietokrzyskie Lake                    | Not recorded                  |
|                | Cergowa Gora                           | Not recorded                  |
|                | Godziszewskie Lake                     | Not recorded                  |
|                | Lake Mikolajki                         | Not recorded                  |
|                | Puscizna Rekowianska                   | Not recorded                  |
| Austria        | <a href="#">Buntes Moor</a>            | <a href="#">Discontinuous</a> |
|                | Dortmunder Hütte                       | Not recorded                  |
|                | Franz Senn-Hütte                       | Not recorded                  |
|                | Egelsee                                | Not recorded                  |
|                | Gerlos                                 | Not recorded                  |
|                | Giering                                | Not recorded                  |
|                | Grünau Moor                            | Not recorded                  |
|                | Lindenmoos                             | Not recorded                  |
|                | Mieminger See                          | Not recorded                  |
|                | Moor Alpenrose                         | Not recorded                  |
|                | Rotmoos Obergurgl                      | Not recorded                  |
|                | Schwarzsee Reschenscheideck            | Not recorded                  |
|                | Schwemm                                | Not recorded                  |
|                | Seefelder See                          | Not recorded                  |
|                | Zirbenwaldmoor                         | Not recorded                  |
|                | <a href="#">Wasenmoos beim Zellhof</a> | <a href="#">Discontinuous</a> |
|                | Grosses Überling Schattseit-Moor       | Not recorded                  |
|                | <a href="#">Dürrenecksee-Moor</a>      | <a href="#">Discontinuous</a> |
|                | <a href="#">Fuchsschwanzmoos</a>       | <a href="#">Discontinuous</a> |
|                | Fuschlsee                              | Not recorded                  |
| Germany        | Ahlenmoor                              | Not recorded                  |
|                | Ahlequellmoor                          | Not recorded                  |
|                | Bruchberg                              | Not recorded                  |
|                | Lüttersee                              | Not recorded                  |
|                | Silberhohl                             | Not recorded                  |
|                | Felchosee                              | Not recorded                  |
|                | Löddigsee                              | Not recorded                  |
|                | Wachel 3                               | Not recorded                  |
|                | Brentenlohe                            | Not recorded                  |
|                | <a href="#">Bruckmisse</a>             | <a href="#">Discontinuous</a> |
|                | Glaswaldsee                            | Not recorded                  |
|                | Herrenwiesser see                      | Not recorded                  |
|                | Durchenbergried                        | Not recorded                  |
|                | Feuenried                              | Not recorded                  |
|                | Gaienhofen                             | Not recorded                  |
|                | Hornstaad-Bodensee                     | Not recorded                  |
|                | Huzenbacher See                        | Not recorded                  |
|                | Mindelsee                              | Not recorded                  |
|                | <a href="#">Steerenmoos</a>            | <a href="#">Discontinuous</a> |

|             |                                             |                               |
|-------------|---------------------------------------------|-------------------------------|
|             | Wilder See beim Ruhestein                   | Not recorded                  |
|             | <a href="#">Wildseemoor bei Kaltenbronn</a> | <a href="#">Discontinuous</a> |
| Switzerland | Derrière les Embreux                        | Not recorded                  |
|             | Etang de la Gruère                          | Not recorded                  |
|             | Le Loclat                                   | Not recorded                  |
|             | Lobsigensee                                 | Not recorded                  |
|             | Montilier                                   | Not recorded                  |
|             | Aegelsee                                    | Not recorded                  |
|             | Amsoldingensee                              | Not recorded                  |
|             | Bachalpsee                                  | Not recorded                  |
|             | Hinterburgseeli                             | Not recorded                  |
|             | Hängstli                                    | Not recorded                  |
|             | Linden                                      | Not recorded                  |
|             | Oberaar                                     | Not recorded                  |
|             | Rotsee                                      | Not recorded                  |
|             | Schwarzsee FR                               | Not recorded                  |
|             | Sägistalsee                                 | Not recorded                  |
|             | Süftenenegg                                 | Not recorded                  |
|             | Aletschwald                                 | Not recorded                  |
|             | Alp Lüsga Belalp 1                          | Not recorded                  |
|             | Alpi di Robièi Val Bavona                   | Not recorded                  |
|             | Alpi di Robièi Val Bavona Bodenprofil       | Not recorded                  |
|             | Bitsch-Naters                               | Not recorded                  |
|             | Eggen ob Blatten                            | Not recorded                  |
|             | Etang d'y Cor Montana                       | Not recorded                  |
|             | <a href="#">Etang de Luissel Bex</a>        | <a href="#">Discontinuous</a> |
|             | <a href="#">Gondo Alpjen</a>                | <a href="#">Discontinuous</a> |
|             | <a href="#">Greicheralp Riederalp</a>       | <a href="#">In expansion</a>  |
|             | Grächen See                                 | Not recorded                  |
|             | Hopschensee                                 | Not recorded                  |
|             | <a href="#">Lac du Mont d'Orge Sion</a>     | <a href="#">Discontinuous</a> |
|             | <a href="#">Mittlere Hellelen</a>           | <a href="#">Discontinuous</a> |
|             | <a href="#">Pillon Gsteig-Diablerets</a>    | <a href="#">Discontinuous</a> |
|             | Simplon-Gampisch-Alter Spittel              | Not recorded                  |
|             | Wallbach Lenk                               | Not recorded                  |
|             | Mont Roux                                   | Not recorded                  |
|             | Gamperfin                                   | Not recorded                  |
|             | Creux de Croue                              | Not recorded                  |
|             | Motta Naluns                                | Not recorded                  |
|             | Praz Rodet                                  | Not recorded                  |
| Italy       | <a href="#">Bondone</a>                     | <a href="#">Continuous</a>    |
|             | Dura-Moor                                   | Not recorded                  |
|             | Malschötscher Hotter                        | Not recorded                  |
|             | Rinderplatz                                 | Not recorded                  |
|             | Schwarzsee                                  | Not recorded                  |
|             | Sommersüss                                  | Not recorded                  |
|             | <a href="#">Grunsee</a>                     | <a href="#">Discontinuous</a> |
|             | Dossaccio Bormio                            | Not recorded                  |
|             | Lac de Villa                                | Not recorded                  |
|             | Lac du Verney-Dessus                        | Not recorded                  |
|             | Torveraz                                    | Not recorded                  |
|             | <a href="#">Tourbière de Pilaz</a>          | <a href="#">Continuous</a>    |
|             | Tourbière de Santa Anna                     | Not recorded                  |
|             | Laghi dell'Orgials                          | Not recorded                  |
|             | Lago Piccolo di Avigliana                   | Not recorded                  |
|             | Ortasee                                     | Not recorded                  |
|             | Refugio Mondovi                             | Not recorded                  |
|             | Selle di Carnino                            | Not recorded                  |
|             | <a href="#">Torbiera del Biecai</a>         | <a href="#">In expansion</a>  |
|             | <a href="#">Lago della Costa</a>            | <a href="#">Continuous</a>    |
|             | Lago Padule                                 | Not recorded                  |
|             | <a href="#">Lago dell'Accesa</a>            | <a href="#">In expansion</a>  |
|             | Colfiorito                                  | Not recorded                  |
|             | Lago Pratignano                             | Not recorded                  |
|             | Ospitale                                    | Not recorded                  |
|             | <a href="#">Pavullo</a>                     | <a href="#">Discontinuous</a> |
|             | <a href="#">Lago di Martignano</a>          | <a href="#">Continuous</a>    |
|             | Lago di Vico                                | Not recorded                  |
|             | <a href="#">Lago Albano</a>                 | <a href="#">In expansion</a>  |
|             | Lago di Nemi                                | Not recorded                  |
|             | <a href="#">Central Adriatic Sea</a>        | <a href="#">Discontinuous</a> |
|             | <a href="#">Salerno Bay</a>                 | <a href="#">Discontinuous</a> |
|             | Lago Grande di Monticchio LGM               | Not recorded                  |
| France      | Aronde                                      | Not recorded                  |
|             | Auneau                                      | Not recorded                  |
|             | Baie de Seine estuary                       | Not recorded                  |

|                                                     |                               |
|-----------------------------------------------------|-------------------------------|
| Change-Glatinier                                    | Not recorded                  |
| La Vie                                              | Not recorded                  |
| <a href="#">Le Fourneau</a>                         | <a href="#">Discontinuous</a> |
| <a href="#">Marais de Kerdual</a>                   | <a href="#">Discontinuous</a> |
| <a href="#">Marais de Lisle</a>                     | <a href="#">Discontinuous</a> |
| Marais de Marchesieux                               | Not recorded                  |
| Mobeche Forest                                      | Not recorded                  |
| Moulin de Thévalles                                 | Not recorded                  |
| Pezou                                               | Not recorded                  |
| Saint-Ursin                                         | Not recorded                  |
| Serrent                                             | Not recorded                  |
| Altenweiher                                         | Not recorded                  |
| Grozon                                              | Not recorded                  |
| <a href="#">Hières sur Amby</a>                     | <a href="#">Discontinuous</a> |
| Lac Cerin                                           | Not recorded                  |
| Lac de Clairvaux                                    | Not recorded                  |
| Lake of Annecy                                      | Not recorded                  |
| Loras                                               | Not recorded                  |
| Lutinière                                           | Not recorded                  |
| Moselotte                                           | Not recorded                  |
| Tourbière de Narbief                                | Not recorded                  |
| La Beuffarde                                        | Not recorded                  |
| Le Grand Lemps                                      | Not recorded                  |
| <a href="#">Tourbières des Granges des Chavants</a> | <a href="#">Discontinuous</a> |
| Ampoix                                              | Not recorded                  |
| Champ Gazon                                         | Not recorded                  |
| Etang de Cheylade                                   | Not recorded                  |
| La Taphanel                                         | Not recorded                  |
| Lac du Bouchet                                      | Not recorded                  |
| <a href="#">Lac du Mont de Belier</a>               | <a href="#">Discontinuous</a> |
| Le Grand Montarnu                                   | Not recorded                  |
| Le Jolan                                            | Not recorded                  |
| Le Miroir                                           | Not recorded                  |
| Montbé                                              | Not recorded                  |
| <a href="#">Moulin de Prugnolas</a>                 | <a href="#">Discontinuous</a> |
| Nataloup                                            | Not recorded                  |
| Peyre peat-bog                                      | Not recorded                  |
| Port des Lamberts                                   | Not recorded                  |
| Saint-Benoit-sur-Loire                              | Not recorded                  |
| Tourbière de Longeyroux                             | Not recorded                  |
| Tourbière de Roussy                                 | Not recorded                  |
| Tourbière des Dauges                                | Not recorded                  |
| La Baforière                                        | Not recorded                  |
| Tourbière de Chabannes                              | Not recorded                  |
| Ancenis                                             | Not recorded                  |
| Basse-Ville                                         | Not recorded                  |
| Bois-Jésus                                          | Not recorded                  |
| Carquefou                                           | Not recorded                  |
| Caves d'Amont                                       | Not recorded                  |
| Cinq-Mars-la-Pile                                   | Not recorded                  |
| Cordemais                                           | Not recorded                  |
| Corniche de Pail                                    | Not recorded                  |
| <a href="#">Ecours</a>                              | <a href="#">Discontinuous</a> |
| Jaunay                                              | Not recorded                  |
| La Bergerie en Charron                              | Not recorded                  |
| La Caudelais                                        | Not recorded                  |
| <a href="#">La Grande Brousse</a>                   | <a href="#">Discontinuous</a> |
| <a href="#">La Grange</a>                           | <a href="#">Discontinuous</a> |
| La boire Torse                                      | Not recorded                  |
| Le Gesvres                                          | Not recorded                  |
| Le Marais de la Perge                               | Not recorded                  |
| <a href="#">Logne</a>                               | <a href="#">Discontinuous</a> |
| Marais de Champtocé                                 | Not recorded                  |
| Marais de Mazerolles                                | Not recorded                  |
| Marais de Munet                                     | Not recorded                  |
| Marais de Méron                                     | Not recorded                  |
| Marais de la Poupinière                             | Not recorded                  |
| Marais des Bourbes                                  | Not recorded                  |
| Oudon                                               | Not recorded                  |
| Pas du Gu                                           | Not recorded                  |
| Petit Marais                                        | Not recorded                  |
| Riabelais                                           | Not recorded                  |
| Saint Viaud Contin                                  | Not recorded                  |
| Tourbière de Nay                                    | Not recorded                  |
| Tourbière de Parçay-sur-Vienne                      | Not recorded                  |
| Vertonne                                            | Not recorded                  |



|          |                         |               |
|----------|-------------------------|---------------|
|          | Clapeyret               | Discontinuous |
|          | Col Luitel              | Not recorded  |
|          | Col des Lauzes          | Not recorded  |
|          | Correo                  | Not recorded  |
|          | Embouchac               | Discontinuous |
|          | Etang d'Ouveillan       | Not recorded  |
|          | Fangeas                 | Not recorded  |
|          | Grand Ratz le Pellet    | Not recorded  |
|          | Lac Long Inférieur      | Not recorded  |
|          | Lac Miroir              | Discontinuous |
|          | Lac Saint Léger         | Not recorded  |
|          | Lac de Praver           | Not recorded  |
|          | Lac des Boites          | Not recorded  |
|          | Lac du Lauzon           | Discontinuous |
|          | Lake Racou              | Not recorded  |
|          | Pelléautier             | Not recorded  |
|          | Pré Rond                | Not recorded  |
|          | Sabbion                 | Not recorded  |
|          | Saint Hilaire du Rosier | Not recorded  |
|          | Saint Julien de Ratz    | Continuous    |
|          | Saint Sixte             | Discontinuous |
|          | Tourbière de Gatimort   | Not recorded  |
|          | Tourbière de Mont Sec   | Not recorded  |
|          | Tourbière de Raux       | Not recorded  |
|          | Tourbière de la Lande   | Not recorded  |
|          | Tourbière du Peschio    | Not recorded  |
| Spain    | Albufera Alcudia        | Not recorded  |
|          | Algendar                | Not recorded  |
|          | Cala Galdana            | Not recorded  |
|          | Cala'n Porter           | Discontinuous |
|          | Antas                   | Not recorded  |
|          | Laguna Salada Chiprana  | Not recorded  |
|          | Navarrés                | Not recorded  |
|          | Atxuri                  | Not recorded  |
|          | Cueto de la Avellanosa  | Not recorded  |
|          | Lago de Ajo             | Discontinuous |
|          | Laguna de la Roya       | Not recorded  |
|          | PRD-4                   | Not recorded  |
|          | Puerto de Los Tornos    | Not recorded  |
|          | Saldropo                | Not recorded  |
|          | Sanabria Marsh          | Not recorded  |
|          | El Payo                 | Not recorded  |
|          | Peña Negra              | Discontinuous |
|          | Quintanar de la Sierra  | Not recorded  |
|          | Salada Pequeña          | Not recorded  |
| Portugal | Charco da Candieira     | Not recorded  |
|          | Lagoa Comprida 2        | Not recorded  |
|          | Lagoa Travessa I        | Not recorded  |
| Syria    | Bouara                  | Not recorded  |
|          | Ghab                    | Not recorded  |
| Israel   | Dead Sea-Ze'elim        | Not recorded  |
|          | Birkat Ram              | Discontinuous |
|          | Lake Kinneret           | Not recorded  |
|          | Hula Valley             | Discontinuous |
| Iran     | Gomishan                | Not recorded  |
|          | Lake Almalou            | Not recorded  |
|          | Lake Urmia              | Continuous    |
|          | Lake Zeribar            | Discontinuous |
|          | Maharlou Lake           | Discontinuous |
| Georgia  | Adange                  | Not recorded  |
|          | Gagra                   | Not recorded  |
|          | Lagodekhi               | Not recorded  |
|          | Supsa River             | Not recorded  |
|          | Lake Bazaleti           | Not recorded  |
|          | Imera lake              | Not recorded  |
|          | Lake Maliq (Albania)    | Discontinuous |
|          | Maharlou Lake (Iran)    | Discontinuous |
|          | Adange                  | Not recorded  |
|          | Gagra                   | Not recorded  |
|          | Lagodekhi               | Not recorded  |
|          | Supsa River             | Not recorded  |
|          | Lake Bazaleti           | Not recorded  |
|          | Imera lake              | Not recorded  |
|          | Lake Maliq (Albania)    | Discontinuous |
|          | Maharlou Lake (Iran)    | Discontinuous |
|          | Adange                  | Not recorded  |

|                     |                   |                |               |               |
|---------------------|-------------------|----------------|---------------|---------------|
| 3 – 2.5 Ka BP       | Albania           | Gagra          | Not recorded  |               |
|                     |                   | Lagodekhi      | Not recorded  |               |
|                     |                   | Supsa River    | Not recorded  |               |
|                     |                   | Lake Bazaleti  | Not recorded  |               |
|                     |                   | Imera lake     | Not recorded  |               |
|                     |                   |                | Lake Maliq    | Discontinuous |
|                     | Turkey            | Lake Manyas    | Continuous    |               |
|                     |                   | Marmara Sea    | Discontinuous |               |
|                     |                   | Abant Gölü     | Continuous    |               |
|                     |                   | Yeniçaga Gölü  | Not recorded  |               |
| Beyşehir Gölü I     |                   | Continuous     |               |               |
| Göhlhisar Gölü I    |                   | Continuous     |               |               |
| Göhlhisar Gölü II   |                   | In expansion   |               |               |
| Hoyran Gölü         |                   | Not recorded   |               |               |
| Karamik Batakligi   |                   | Discontinuous  |               |               |
| Köycegiz Gölü       |                   | Discontinuous  |               |               |
| Ova Gölü            |                   | In contraction |               |               |
| Pinarbasi           |                   | Continuous     |               |               |
| Söğüt Gölü          |                   | Continuous     |               |               |
| Sagalassos-Gravgaz  |                   | Not recorded   |               |               |
| Greece              |                   | Ladik Gölü     | Continuous    |               |
|                     | Lake Van          | Discontinuous  |               |               |
|                     | Kournas           | Discontinuous  |               |               |
|                     | Paiko             | Not recorded   |               |               |
|                     | Lailias           | Not recorded   |               |               |
|                     | Elatia-Rhodopes   | Continuous     |               |               |
|                     | Kastoria          | Not recorded   |               |               |
|                     | Orestias          | Continuous     |               |               |
|                     | Khimaditis III    | Continuous     |               |               |
|                     | Vegoritis         | Continuous     |               |               |
|                     | Edessa            | Continuous     |               |               |
|                     | Litochoro         | Continuous     |               |               |
|                     | Tenaghi Philippon | Discontinuous  |               |               |
|                     | Lerna             | In expansion   |               |               |
|                     | Trikhonis         | Not recorded   |               |               |
| Ioannina I          | Not recorded      |                |               |               |
| Ioannina II         | Not recorded      |                |               |               |
| Bulgary             | Halos             | Discontinuous  |               |               |
|                     | Xinias            | Continuous     |               |               |
|                     | Voukaria          | Not recorded   |               |               |
|                     | Pertouli          | Not recorded   |               |               |
|                     | Myrtoon Basin     | Continuous     |               |               |
|                     | Beliya Kanton     | Continuous     |               |               |
|                     | Kupena II         | Not recorded   |               |               |
|                     | Ribno I           | Discontinuous  |               |               |
|                     | Popovo Ezero      | Not recorded   |               |               |
|                     | Mutorog           | Not recorded   |               |               |
|                     | Trilistnika       | Continuous     |               |               |
|                     | Sozopol           | Continuous     |               |               |
|                     | Arkutino I        | Not recorded   |               |               |
|                     | Arkutino II       | Discontinuous  |               |               |
|                     | Black Sea South   | Not recorded   |               |               |
| Black Sea Southwest | Not recorded      |                |               |               |
| Duranunlak II       | Not recorded      |                |               |               |
| Duranunlak I        | Not recorded      |                |               |               |
| Shabla-Ezeretz      | Discontinuous     |                |               |               |
| Varna I             | Not recorded      |                |               |               |
| Varna II            | Discontinuous     |                |               |               |
| Srebarna            | Continuous        |                |               |               |
| Mire Garvan         | Not recorded      |                |               |               |
| Maleshevska         | Continuous        |                |               |               |
| Osogovo             | Continuous        |                |               |               |
| Begbunar            | Continuous        |                |               |               |
| Sredna Gora         | Not recorded      |                |               |               |
| Straldzha mire      | Not recorded      |                |               |               |
| Tchokljovo Marsh    | Not recorded      |                |               |               |
| Romania             | Vitosha           | Not recorded   |               |               |
|                     | Avrig I           | Discontinuous  |               |               |
|                     | Avrig II          | Not recorded   |               |               |
|                     | Mohos             | Not recorded   |               |               |
|                     | Luci              | Not recorded   |               |               |
|                     | Bisoca            | Not recorded   |               |               |
|                     | Calinease         | Not recorded   |               |               |
|                     | Semenic           | Not recorded   |               |               |
|                     | Stereioiu         | Not recorded   |               |               |

|                                  |                            |                  |              |
|----------------------------------|----------------------------|------------------|--------------|
| Hungary                          | Alsópáhok                  | Not recorded     |              |
|                                  | Balaton Centre             | Not recorded     |              |
|                                  | Balaton Northeast          | In expansion     |              |
|                                  | Balaton Southwest          | Not recorded     |              |
|                                  | Nagy-Mohos                 | Not recorded     |              |
|                                  | Pölöske                    | Not recorded     |              |
| Slovakia                         | Pötréte                    | Not recorded     |              |
|                                  | Szigliget                  | Continuous       |              |
| Slovakia                         | Bobrov                     | Not recorded     |              |
|                                  | Zlatnicka Dolina           | Not recorded     |              |
| Czech Republic                   | Strbské pleso              | Not recorded     |              |
|                                  | Tlstá hora                 | Not recorded     |              |
| Czech Republic                   | Dvur Ansov                 | Not recorded     |              |
|                                  | Olbramovice                | Not recorded     |              |
| Czech Republic                   | Vracov                     | Discontinuous    |              |
|                                  | Palasiny                   | Not recorded     |              |
|                                  | Kozli                      | Not recorded     |              |
|                                  | Rezabinec                  | Not recorded     |              |
|                                  | Borkovicka blata           | Not recorded     |              |
|                                  | Branna                     | Discontinuous    |              |
|                                  | Loucky                     | Not recorded     |              |
|                                  | Chrást                     | Not recorded     |              |
|                                  | Velka niva                 | Not recorded     |              |
|                                  | Malá niva                  | Not recorded     |              |
|                                  | Mrtv8 luh                  | Not recorded     |              |
|                                  | Stráženská slat            | Not recorded     |              |
|                                  | Komoranské jezero          | Not recorded     |              |
|                                  | Dolskym                    | Not recorded     |              |
|                                  | Velky Ded                  | Not recorded     |              |
|                                  | Pancavská louka            | Not recorded     |              |
|                                  | Pryskyríc8 dul             | Not recorded     |              |
|                                  | Tpské raseliniste Mire II  | Not recorded     |              |
|                                  | Tpské raseliniste Mire III | Not recorded     |              |
|                                  | Ukraina                    | Dovjok Swamp     | Not recorded |
| Ukraina                          | Maly Podleski              | Not recorded     |              |
|                                  | Pecheniya                  | Not recorded     |              |
| Croatia                          | Bokanjacko (Croatia)       | Not recorded     |              |
| Croatia                          | Mljet (Croatia)            | Continuous       |              |
|                                  | Poland                     | Bledowo Lake     | Not recorded |
| Poland                           | Giecz                      | Not recorded     |              |
|                                  | Lake Gosciaz               | Not recorded     |              |
|                                  | Lake Skrzetuszewskie       | Not recorded     |              |
|                                  | Slawsko                    | Discontinuous    |              |
|                                  | Swietokrzyskie Lake        | Not recorded     |              |
|                                  | Cergowa Gora               | Not recorded     |              |
|                                  | Godziszewskie Lake         | Not recorded     |              |
|                                  | Lake Mikolajki             | Not recorded     |              |
|                                  | Puscizna Rekowianska       | Not recorded     |              |
|                                  | Buntes Moor (Austria)      | Not recorded     |              |
|                                  | Austria                    | Dortmunder Hütte | Not recorded |
|                                  |                            | Franz Senn-Hütte | Not recorded |
|                                  | Austria                    | Egelsee          | Not recorded |
|                                  |                            | Gerlos           | Not recorded |
| Giering                          |                            | Not recorded     |              |
| Gradenmoos                       |                            | Not recorded     |              |
| Grünau Moor                      |                            | Not recorded     |              |
| Lindenmoos                       |                            | Not recorded     |              |
| Mieminger See                    |                            | Not recorded     |              |
| Moor Alpenrose                   |                            | Discontinuous    |              |
| Rotmoos Obergurgl                |                            | Not recorded     |              |
| Schwarzsee Reschenscheideck      |                            | Not recorded     |              |
| Schwemm                          |                            | Not recorded     |              |
| Seefelder See                    |                            | Not recorded     |              |
| Zirbenwaldmoor                   |                            | Not recorded     |              |
| Wasenmoos beim Zellhof           |                            | Not recorded     |              |
| Grosses Überling Schattseit-Moor |                            | Not recorded     |              |
| Dürrenecksee-Moor                |                            | Not recorded     |              |
| Fuchsschwanzmoos                 |                            | Not recorded     |              |
| Germany                          |                            | Fuschlsee        | Not recorded |
|                                  | Ahlenmoor                  | Not recorded     |              |
|                                  | Ahlequellmoor              | Not recorded     |              |
|                                  | Bruchberg                  | Not recorded     |              |
|                                  | Lüttersee                  | Not recorded     |              |
|                                  | Silberhohl                 | Discontinuous    |              |
|                                  | Sonnenberger Moor          | Not recorded     |              |
|                                  | Felchosee                  | Not recorded     |              |

|             |                                                |                               |
|-------------|------------------------------------------------|-------------------------------|
|             | Löddigsee                                      | Not recorded                  |
|             | Wachel 3                                       | Not recorded                  |
|             | Brentenlohe                                    | Not recorded                  |
|             | Bruckmisse                                     | Not recorded                  |
|             | Glaswaldsee                                    | Not recorded                  |
|             | <a href="#">Herrenwiesser see</a>              | <a href="#">Discontinuous</a> |
|             | Durchenbergried                                | Not recorded                  |
|             | Feuenried                                      | Not recorded                  |
|             | Gaienhofen                                     | Not recorded                  |
|             | Hornstaad-Bodensee                             | Not recorded                  |
|             | Huzenbacher See                                | Not recorded                  |
|             | Mindelsee                                      | Not recorded                  |
|             | Stierenmoos                                    | Not recorded                  |
|             | Wilder See beim Ruhestein                      | Not recorded                  |
|             | <a href="#">Wildseemoor bei Kaltenbronn</a>    | <a href="#">Discontinuous</a> |
| Switzerland | Derrière les Embreux                           | Not recorded                  |
|             | <a href="#">Etang de la Gruère</a>             | <a href="#">Discontinuous</a> |
|             | Le Loclat                                      | Not recorded                  |
|             | Lobsigensee                                    | Not recorded                  |
|             | Montilier                                      | Not recorded                  |
|             | Aegelsee                                       | Not recorded                  |
|             | Amsoldingensee                                 | Not recorded                  |
|             | Bachalpsee                                     | Not recorded                  |
|             | Hinterburgseeli                                | Not recorded                  |
|             | Hängstli                                       | Not recorded                  |
|             | <a href="#">Linden</a>                         | <a href="#">Discontinuous</a> |
|             | Oberaar                                        | Not recorded                  |
|             | <a href="#">Rotsee</a>                         | <a href="#">Discontinuous</a> |
|             | Schwarzsee FR                                  | Not recorded                  |
|             | Sägistalsee                                    | Not recorded                  |
|             | Stiftenegg                                     | Not recorded                  |
|             | Aletschwald                                    | Not recorded                  |
|             | Alp Lüsga Belalp 1                             | Not recorded                  |
|             | Alpi di Robièi Val Bavona                      | Not recorded                  |
|             | Alpi di Robièi Val Bavona Bodenprofil          | Not recorded                  |
|             | Bitsch-Naters                                  | Not recorded                  |
|             | Eggen ob Blatten                               | Not recorded                  |
|             | Etang d'y Cor Montana                          | Not recorded                  |
|             | Etang de Luissel Bex                           | Not recorded                  |
|             | Gondo Alphen                                   | Not recorded                  |
|             | Grächen See                                    | Not recorded                  |
|             | Hopschensee                                    | Not recorded                  |
|             | <a href="#">Lac du Mont d'Orge Sion</a>        | <a href="#">In expansion</a>  |
|             | <a href="#">Mittlere Hellelen</a>              | <a href="#">Discontinuous</a> |
|             | Pillon Gsteig-Diablerets                       | Not recorded                  |
|             | <a href="#">Simplon-Gampisch-Alter Spittel</a> | <a href="#">Discontinuous</a> |
|             | Wallbach Lenk                                  | Not recorded                  |
|             | Mont Roux                                      | Not recorded                  |
|             | Gamperfin                                      | Not recorded                  |
|             | Creux de Croue                                 | Not recorded                  |
|             | Motta Naluns                                   | Not recorded                  |
|             | Praz Rodet                                     | Not recorded                  |
| Italy       | Dura-Moor                                      | Not recorded                  |
|             | Malschötscher Hotter                           | Not recorded                  |
|             | Rinderplatz                                    | Not recorded                  |
|             | <a href="#">Schwarzsee</a>                     | <a href="#">Discontinuous</a> |
|             | <a href="#">Sommersüss</a>                     | <a href="#">Discontinuous</a> |
|             | Grunsee                                        | Not recorded                  |
|             | Dossaccio Bormio                               | Not recorded                  |
|             | Lac de Lod                                     | Not recorded                  |
|             | Lac de Villa                                   | Not recorded                  |
|             | Lac du Verney-Dessus                           | Not recorded                  |
|             | Torveraz                                       | Not recorded                  |
|             | <a href="#">Tourbière de Pilaz</a>             | <a href="#">Continuous</a>    |
|             | Tourbière de Santa Anna                        | Not recorded                  |
|             | Laghi dell'Orgials                             | Not recorded                  |
|             | Lago Piccolo di Avigliana                      | Not recorded                  |
|             | Ortasee                                        | Not recorded                  |
|             | Ortasee II                                     | Not recorded                  |
|             | Refugio Mondovi                                | Not recorded                  |
|             | Selle di Carnino                               | Not recorded                  |
|             | <a href="#">Torbiera del Biecai</a>            | <a href="#">Continuous</a>    |
|             | <a href="#">Lago della Costa</a>               | <a href="#">Continuous</a>    |
|             | Lago Padule                                    | Not recorded                  |
|             | <a href="#">Lago dell'Accesa</a>               | <a href="#">Continuous</a>    |
|             | Colfiorito                                     | <a href="#">Discontinuous</a> |

|        |                                      |                |
|--------|--------------------------------------|----------------|
|        | Lago Pratignano                      | Discontinuous  |
|        | Ospitale                             | Not recorded   |
|        | Pavullo                              | Discontinuous  |
|        | Lago di Martignano                   | In contraction |
|        | Lago di Vico                         | Continuous     |
|        | Lago Albano                          | Continuous     |
|        | Lago di Nemi                         | In expansion   |
|        | Central Adriatic Sea                 | Discontinuous  |
|        | Salerno Bay                          | Discontinuous  |
|        | Lago Grande di Monticchio LGM        | Discontinuous  |
| France | Aronde                               | Not recorded   |
|        | Auneau                               | Not recorded   |
|        | Baie de Seine estuary                | Not recorded   |
|        | Change-Glatinier                     | Not recorded   |
|        | Coulvain                             | Not recorded   |
|        | La Verderie                          | Not recorded   |
|        | La Vie                               | Discontinuous  |
|        | Lavaré                               | Not recorded   |
|        | Le Fourneau                          | Not recorded   |
|        | Lingreville                          | Discontinuous  |
|        | Marais de Kerdual                    | Discontinuous  |
|        | Marais de Lisle                      | Not recorded   |
|        | Marais de Marchesieux                | Discontinuous  |
|        | Mobeche Forest                       | Not recorded   |
|        | Moulin de Thévalles                  | Not recorded   |
|        | Pezou                                | Not recorded   |
|        | Saint-Ursin                          | Not recorded   |
|        | Serrent                              | Not recorded   |
|        | Altenweiher                          | In expansion   |
|        | Grozon                               | Discontinuous  |
|        | Hières sur Amby                      | Discontinuous  |
|        | Lac Cerin                            | Not recorded   |
|        | Lac de Clairvaux                     | Not recorded   |
|        | Lake of Annecy                       | Not recorded   |
|        | Loras                                | Discontinuous  |
|        | Lutinière                            | Not recorded   |
|        | Moselotte                            | Not recorded   |
|        | Tourbière de Narbief                 | Discontinuous  |
|        | col du Petit Saint Bernard           | Not recorded   |
|        | La Beuffarde                         | Not recorded   |
|        | Le Grand Lemps                       | Not recorded   |
|        | Tourbière du Mou de Pleure (Francia) | Not recorded   |
|        | Tourbières des Granges des Chavants  | Not recorded   |
|        | Ampoix                               | Discontinuous  |
|        | Champ Gazon                          | Not recorded   |
|        | Etang Bouquin                        | Not recorded   |
|        | Etang de Cheylade                    | Continuous     |
|        | La Taphanel                          | Not recorded   |
|        | Lac du Bouchet                       | Not recorded   |
|        | Lac du Mont de Belier                | Not recorded   |
|        | Le Grand Montarnu                    | Not recorded   |
|        | Le Jolan                             | Not recorded   |
|        | Le Miroir                            | Not recorded   |
|        | Les Chaux de Coudert                 | Not recorded   |
|        | Marais de Maurepas                   | Not recorded   |
|        | Montbé                               | Not recorded   |
|        | Moulin de Prugnolas                  | Not recorded   |
|        | Nataloup                             | Not recorded   |
|        | Peyre peat-bog                       | Not recorded   |
|        | Port des Lamberts                    | Not recorded   |
|        | Saint-Benoit-sur-Loire               | Not recorded   |
|        | Sources de l'Yonne                   | Not recorded   |
|        | Tourbière de Longeyroux              | Not recorded   |
|        | Tourbière de Roussy                  | Not recorded   |
|        | Tourbière des Dauges                 | Not recorded   |
|        | La Baforière                         | Not recorded   |
|        | Tourbière de Chabannes               | Not recorded   |
|        | Ancenis                              | Discontinuous  |
|        | Basse-Ville                          | Not recorded   |
|        | Bois-Jésus                           | Not recorded   |
|        | Carquefou                            | Not recorded   |
|        | Caves d'Amont                        | Not recorded   |
|        | Cinq-Mars-la-Pile                    | Not recorded   |
|        | Cordemais                            | Not recorded   |
|        | Corniche de Pail                     | Not recorded   |
|        | Jaunay                               | Not recorded   |

|          |                                |               |
|----------|--------------------------------|---------------|
|          | La Bergerie en Charron         | Discontinuous |
|          | La Caudelais                   | Not recorded  |
|          | La Grande Brousse              | Not recorded  |
|          | La Grange                      | Not recorded  |
|          | La boire Torse                 | Not recorded  |
|          | Le Gesvres                     | Not recorded  |
|          | Le Marais de la Perge          | Not recorded  |
|          | Logne                          | Not recorded  |
|          | Marais de Champtocé            | Discontinuous |
|          | Marais de Mazerolles           | Not recorded  |
|          | Marais de Munet                | Not recorded  |
|          | Marais de Méron                | Not recorded  |
|          | Marais de la Poupinière        | Not recorded  |
|          | Marais des Bourbes             | Discontinuous |
|          | Oudon                          | Not recorded  |
|          | Pas du Gu                      | Not recorded  |
|          | Petit Marais                   | Discontinuous |
|          | Riabelais                      | Not recorded  |
|          | Saint Viaud Contin             | Not recorded  |
|          | Tourbière de Nay               | Not recorded  |
|          | Tourbière de Parçay-sur-Vienne | Not recorded  |
|          | Vertonne                       | Discontinuous |
|          | Clapeyret                      | Discontinuous |
|          | Col Luitel                     | Continuous    |
|          | Col des Lauzes                 | In expansion  |
|          | Correo                         | Not recorded  |
|          | Embouchac                      | Not recorded  |
|          | Etang d'Ouveillan              | Discontinuous |
|          | Fangeas                        | Not recorded  |
|          | Grand Ratz le Pellet           | Not recorded  |
|          | Lac Long Inférieur             | Discontinuous |
|          | Lac Miroir                     | Not recorded  |
|          | Lac Saint Léger                | Not recorded  |
|          | Lac de Praver                  | Not recorded  |
|          | Lac des Boites                 | Continuous    |
|          | Lac du Lauzon                  | Discontinuous |
|          | Lake Racou                     | Not recorded  |
|          | Pelléautier                    | Not recorded  |
|          | Pré Rond                       | Not recorded  |
|          | Sabbion                        | Discontinuous |
|          | Saint Hilaire du Rosier        | Not recorded  |
|          | Saint Julien de Ratz           | Continuous    |
|          | Saint Sixte                    | Not recorded  |
|          | Tourbière de Gatimort          | Not recorded  |
|          | Tourbière de Mont Sec          | Not recorded  |
|          | Tourbière de Raux              | Not recorded  |
|          | Tourbière de la Lande          | Not recorded  |
|          | Tourbière du Peschio           | Not recorded  |
| Spain    | Albufera Alcudia               | Discontinuous |
|          | Algendar                       | Discontinuous |
|          | Cala Galdana                   | Not recorded  |
|          | Antas                          | Not recorded  |
|          | Laguna Salada Chiprana         | Not recorded  |
|          | Navarrés                       | Not recorded  |
|          | Atxuri                         | Not recorded  |
|          | Cueto de la Avellanosa         | Not recorded  |
|          | Lago de Ajo                    | In expansion  |
|          | Laguna de la Roya              | Not recorded  |
|          | PRD-4                          | Not recorded  |
|          | Puerto de Los Tornos           | Not recorded  |
|          | Saldropo                       | Not recorded  |
|          | Sanabria Marsh                 | Not recorded  |
|          | El Payo                        | Discontinuous |
|          | Peña Negra                     | Discontinuous |
|          | Quintanar de la Sierra         | Discontinuous |
|          | Salada Pequeña                 | Discontinuous |
| Portugal | Charco da Candieira            | Not recorded  |
|          | Lagoa Comprida 2               | Not recorded  |
|          | Lagoa Travessa I               | Not recorded  |
| Syria    | Bouara                         | Discontinuous |
|          | Ghab                           | Not recorded  |
| Israel   | Dead Sea-Ze'elim               | Not recorded  |
|          | Birkat Ram                     | In expansion  |
|          | Lake Kinneret                  | Not recorded  |
|          | Hula Valley                    | Discontinuous |
| Iran     | Gomishan                       | Not recorded  |

|                     |               |                    |                |
|---------------------|---------------|--------------------|----------------|
| 2.5 – 2 Ka BP       | Georgia       | Lake Almalou       | Not recorded   |
|                     |               | Lake Urmia         | Continuous     |
|                     |               | Lake Zeribar       | Discontinuous  |
|                     |               | Maharlou Lake      | In expansion   |
|                     |               | Adange             | Discontinuous  |
|                     |               | Amtkel             | Not recorded   |
|                     |               | Gagra              | Not recorded   |
|                     |               | Lagodekhi          | Not recorded   |
|                     |               | Supsa River        | Not recorded   |
|                     | Albania       | Lake Bazaleti      | Continuous     |
|                     |               | Imera lake         | Not recorded   |
|                     |               | Lake Maliq         | Discontinuous  |
|                     | Turkey        | Lake Manyas        | Continuous     |
|                     |               | Marmara Sea        | In expansion   |
|                     |               | Abant Gölü         | In contraction |
|                     |               | Beyşehir Gölü I    | Continuous     |
|                     |               | Göhlisar Gölü I    | Continuous     |
|                     |               | Göhlisar Gölü II   | Continuous     |
|                     |               | Hoyran Gölü        | In expansion   |
|                     |               | Kararmik Batakligi | Not recorded   |
|                     |               | Köycegiz Gölü      | Not recorded   |
|                     |               | Ova Gölü           | Discontinuous  |
|                     |               | Pinarbasi          | Continuous     |
|                     |               | Sögüt Gölü         | Continuous     |
|                     |               | Sagalassos-Gravgaz | Continuous     |
|                     |               | Ladik Gölü         | Continuous     |
|                     |               | Lake Van           | Discontinuous  |
| Greece              |               | Kournas            | Discontinuous  |
|                     |               | Paiko              | Continuous     |
|                     |               | Lailias            | Not recorded   |
|                     |               | Elatia-Rhodopes    | Continuous     |
|                     |               | Kastoria           | Not recorded   |
|                     |               | Orestias           | Continuous     |
|                     |               | Khimaditis III     | Continuous     |
|                     |               | Vegoritis          | Continuous     |
|                     |               | Edessa             | Continuous     |
|                     |               | Litochoro          | Continuous     |
|                     |               | Tenaghi Philippon  | Discontinuous  |
|                     |               | Lerna              | Continuous     |
|                     | Trikhonis     | Continuous         |                |
|                     | Ioannina I    | Discontinuous      |                |
|                     | Ioannina II   | Not recorded       |                |
|                     | Halos         | Not recorded       |                |
|                     | Xinias        | Continuous         |                |
|                     | Bulgary       | Voulkaria          | Not recorded   |
| Pertouli            |               | Not recorded       |                |
| Myrtoon Basin       |               | Continuous         |                |
| Beliya Kanton       |               | Continuous         |                |
| Kupena II           |               | Discontinuous      |                |
| Ribno I             |               | In expansion       |                |
| Popovo Ezero        |               | Not recorded       |                |
| Mutorog             |               | Not recorded       |                |
| Trilistnika         |               | Continuous         |                |
| Suho Ezero          |               | Discontinuous      |                |
| Sozopol             |               | Continuous         |                |
| Arkutino I          |               | Discontinuous      |                |
| Arkutino II         |               | Not recorded       |                |
| Black Sea South     |               | Not recorded       |                |
| Black Sea Southwest |               | Not recorded       |                |
| Duranunlak II       |               | Discontinuous      |                |
| Duranunlak I        |               | Not recorded       |                |
| Shabla-Ezeretz      |               | Discontinuous      |                |
| Varna I             | Discontinuous |                    |                |
| Varna II            | Discontinuous |                    |                |
| Srebarna            | Continuous    |                    |                |
| Mire Garvan         | Discontinuous |                    |                |
| Maleshevska         | Continuous    |                    |                |
| Osogovo             | Continuous    |                    |                |
| Begbunar            | Continuous    |                    |                |
| Sredna Gora         | Not recorded  |                    |                |
| Straldzha mire      | Not recorded  |                    |                |
| Tchokljovo Marsh    | Not recorded  |                    |                |
| Romania             | Vitoshia      | Not recorded       |                |
|                     | Avrig I       | Discontinuous      |                |
|                     | Avrig II      | Not recorded       |                |

|                |                                  |               |
|----------------|----------------------------------|---------------|
|                | Mohos                            | Not recorded  |
|                | Luci                             | Discontinuous |
|                | Bisoca                           | Not recorded  |
|                | Calinease                        | Not recorded  |
|                | Semic                            | Not recorded  |
|                | Stereoiu                         | Not recorded  |
| Hungary        | Alsópáhok                        | Not recorded  |
|                | Balaton Centre                   | Discontinuous |
|                | Balaton Northeast                | Continuous    |
|                | Balaton Southwest                | Not recorded  |
|                | Nagy-Mohos                       | Discontinuous |
|                | Pölöske                          | Not recorded  |
|                | Pötréte                          | Discontinuous |
|                | Szigliget                        | Continuous    |
| Slovakia       | Bobrov                           | Not recorded  |
|                | Zlatnicka Dolina                 | Not recorded  |
|                | Strbské pleso                    | Not recorded  |
|                | Tlstá hora                       | In expansion  |
| Czech Republic | Dvur Ansov                       | Not recorded  |
|                | Olbramovice                      | Discontinuous |
|                | Vracov                           | Discontinuous |
|                | Palasiny                         | Not recorded  |
|                | Kozli                            | Not recorded  |
|                | Rezabinec                        | Not recorded  |
|                | Borkovicka blata                 | Not recorded  |
|                | Branna                           | Not recorded  |
|                | Loucky                           | Discontinuous |
|                | Chrást                           | Not recorded  |
|                | Velka niva                       | Not recorded  |
|                | Malá niva                        | Not recorded  |
|                | Mrtv8 luh                        | Not recorded  |
|                | Strázenská slat                  | Not recorded  |
|                | Komoranské jezero                | Not recorded  |
|                | Dolskym                          | Not recorded  |
|                | Na bahne                         | Not recorded  |
|                | Velky Ded                        | Not recorded  |
|                | Pancavská louka                  | Not recorded  |
|                | Pryskyrin8 dul                   | Not recorded  |
|                | Tpské raseliniste Mire II        | Not recorded  |
|                | Tpské raseliniste Mire III       | Not recorded  |
| Ukraina        | Dovjok Swamp                     | Not recorded  |
|                | Maly Podleski                    | Not recorded  |
|                | Pecheniya                        | Not recorded  |
| Croatia        | Bokanjacko                       | Discontinuous |
|                | Mljet                            | Continuous    |
| Poland         | Bledowo Lake                     | Not recorded  |
|                | Giecz                            | Not recorded  |
|                | Lake Gosciuz                     | Not recorded  |
|                | Lake Skrzetuszewskie             | Not recorded  |
|                | Slawsko                          | Not recorded  |
|                | Swietokrzyskie Lake              | Not recorded  |
|                | Cergowa Gora                     | Not recorded  |
|                | Godziszewskie Lake               | Not recorded  |
|                | Lake Mikolajki                   | Not recorded  |
|                | Puscizna Rekowianska             | Not recorded  |
| Austria        | Buntes Moor                      | Discontinuous |
|                | Dortmunder Hütte                 | Not recorded  |
|                | Franz Senn-Hütte                 | Not recorded  |
|                | Egelsee                          | Not recorded  |
|                | Gerlos                           | Not recorded  |
|                | Giering                          | Not recorded  |
|                | Gradenmoos                       | Not recorded  |
|                | Grünau Moor                      | Not recorded  |
|                | Lindenmoos                       | Not recorded  |
|                | Mieminger See                    | Not recorded  |
|                | Moor Alpenrose                   | Not recorded  |
|                | Rotmoos Obergurgl                | Not recorded  |
|                | Schwarzsee Reschenscheideck      | Not recorded  |
|                | Schwemm                          | Not recorded  |
|                | Seefelder See                    | Not recorded  |
|                | Zirbenwaldmoor                   | Not recorded  |
|                | Wasenmoos beim Zellhof           | Not recorded  |
|                | Grosses Überling Schattseit-Moor | Not recorded  |
|                | Dürrenecksee-Moor                | Not recorded  |
|                | Fuchsschwanzmoos                 | Not recorded  |
|                | Fuschlsee                        | Not recorded  |



|                                       |                           |                      |              |
|---------------------------------------|---------------------------|----------------------|--------------|
| Germany                               | Ahlenmoor                 | Not recorded         |              |
|                                       | Ahlequellmoor             | Not recorded         |              |
|                                       | Bruchberg                 | Not recorded         |              |
|                                       | Lüttersee                 | Not recorded         |              |
|                                       | Silberhohl                | Discontinuous        |              |
|                                       | Sonnenberger Moor         | Not recorded         |              |
|                                       | Dunum (Hilliges Moor)     | Not recorded         |              |
|                                       | Felchensee                | Not recorded         |              |
|                                       | Löddigsee                 | Not recorded         |              |
|                                       | Wachel 3                  | Not recorded         |              |
|                                       | Brentenlohe               | Discontinuous        |              |
|                                       | Bruckmisse                | Discontinuous        |              |
|                                       | Glaswaldsee               | Discontinuous        |              |
|                                       | Herrenwiesser see         | Discontinuous        |              |
|                                       | Durchenbergried           | Discontinuous        |              |
|                                       | Feuenried                 | Not recorded         |              |
|                                       | Gaienhofen                | Not recorded         |              |
|                                       | Hornstaad-Bodensee        | Discontinuous        |              |
|                                       | Huzenbacher See           | Discontinuous        |              |
|                                       | Mindelsee                 | Discontinuous        |              |
|                                       | Oberderdingen-Großvillars | Not recorded         |              |
|                                       | Steenmoos                 | Not recorded         |              |
|                                       | Wilder See beim Ruhestein | Not recorded         |              |
|                                       | Switzerland               | Derrière les Embreux | Not recorded |
|                                       |                           | Etang de la Gruère   | Not recorded |
|                                       |                           | Le Loclat            | Continuous   |
|                                       |                           | Lobsigensee          | Continuous   |
| Montilier                             |                           | Continuous           |              |
| Aegelsee                              |                           | Not recorded         |              |
| Amsoldingensee                        |                           | Not recorded         |              |
| Bachalpsee                            |                           | Not recorded         |              |
| Hinterburgseeli                       |                           | Discontinuous        |              |
| Hängstli                              |                           | Not recorded         |              |
| Linden                                |                           | Not recorded         |              |
| Oberaar                               |                           | Not recorded         |              |
| Rotsee                                |                           | Not recorded         |              |
| Schwarzsee FR                         |                           | Discontinuous        |              |
| Sägistalsee                           |                           | Not recorded         |              |
| Stiftenegg                            |                           | Not recorded         |              |
| Aletschwald                           |                           | Not recorded         |              |
| Alp Lüsga Belalp 1                    |                           | Not recorded         |              |
| Alpi di Robièi Val Bavona             |                           | Not recorded         |              |
| Alpi di Robièi Val Bavona Bodenprofil |                           | Discontinuous        |              |
| Bitsch-Naters                         |                           | Not recorded         |              |
| Eggen ob Blatten                      |                           | Not recorded         |              |
| Etang d'y Cor Montana                 |                           | Discontinuous        |              |
| Etang de Luissel Bex                  |                           | In expansion         |              |
| Gondo Alpjes                          |                           | Not recorded         |              |
| Grächen See                           |                           | Discontinuous        |              |
| Hopschensee                           |                           | Continuous           |              |
| Lac du Mont d'Orge Sion               | Continuous                |                      |              |
| Mittlere Hellelen                     | Not recorded              |                      |              |
| Pillon Gsteig-Diablerets              | Not recorded              |                      |              |
| Wallbach Lenk                         | Not recorded              |                      |              |
| Mont Roux                             | Not recorded              |                      |              |
| Gamperfin                             | Not recorded              |                      |              |
| Creux de Croue                        | Not recorded              |                      |              |
| Motta Naluns                          | Discontinuous             |                      |              |
| Praz Rodet                            | Discontinuous             |                      |              |
| Italy                                 | Dura-Moor                 | Discontinuous        |              |
|                                       | Malschötscher Hotter      | Continuous           |              |
|                                       | Rinderplatz               | Not recorded         |              |
|                                       | Schwarzsee                | Discontinuous        |              |
|                                       | Sommersüss                | Discontinuous        |              |
|                                       | Grunsee                   | Not recorded         |              |
|                                       | Dossaccio Bormio          | Not recorded         |              |
|                                       | Lac de Lod                | Not recorded         |              |
|                                       | Lac de Villa              | Continuous           |              |
|                                       | Lac du Verney-Dessus      | Discontinuous        |              |
|                                       | Torveraz                  | Discontinuous        |              |
|                                       | Tourbière de Pilaz        | Continuous           |              |
|                                       | Tourbière de Santa Anna   | Not recorded         |              |
|                                       | Laghi dell'Orgials        | Not recorded         |              |
|                                       | Lago Piccolo di Avigliana | Continuous           |              |
|                                       | Ortasee                   | Discontinuous        |              |
|                                       | Ortasee II                | Discontinuous        |              |

|        |                                      |                |
|--------|--------------------------------------|----------------|
|        | Refugio Mondovi                      | Not recorded   |
|        | Selle di Carnino                     | Not recorded   |
|        | Torbiera del Biecai                  | Continuous     |
|        | Lago della Costa                     | Continuous     |
|        | Lago Padule                          | Not recorded   |
|        | Colfiorito                           | Discontinuous  |
|        | Lago Pratignano                      | Discontinuous  |
|        | Ospitale                             | Not recorded   |
|        | Pavullo                              | Discontinuous  |
|        | Parma                                | Discontinuous  |
|        | Lago di Martignano                   | Discontinuous  |
|        | Lago di Vico                         | Continuous     |
|        | Lago Albano                          | Continuous     |
|        | Lago di Nemi                         | Continuous     |
|        | Central Adriatic Sea                 | In expansion   |
|        | Salerno Bay                          | Discontinuous  |
|        | Lago Grande di Monticchio LGM        | Discontinuous  |
|        | Bradano Valley                       | In contraction |
|        | Aronde (France)                      | Discontinuous  |
| France | Auneau                               | Not recorded   |
|        | Baie de Seine estuary                | Not recorded   |
|        | Change-Glatinier                     | Not recorded   |
|        | Coulvain                             | Not recorded   |
|        | La Verderie                          | Not recorded   |
|        | La Vie                               | Not recorded   |
|        | Lavaré                               | Not recorded   |
|        | Le Fourneau                          | Not recorded   |
|        | Lingreville                          | Not recorded   |
|        | Marais de Kerdual                    | Not recorded   |
|        | Marais de Lisle                      | Discontinuous  |
|        | Marais de Marchesieux                | Discontinuous  |
|        | Mobeche Forest                       | Not recorded   |
|        | Moulin de Thévalles                  | Not recorded   |
|        | Pezou                                | Discontinuous  |
|        | Rimarde                              | Discontinuous  |
|        | Saint-Ursin                          | Discontinuous  |
|        | Serrent                              | Not recorded   |
|        | Grozon                               | Discontinuous  |
|        | Hières sur Amby                      | Discontinuous  |
|        | Lac Cerin                            | Not recorded   |
|        | Lac de Clairvaux                     | Not recorded   |
|        | Lac de Malpas                        | Not recorded   |
|        | Lake of Annecy                       | Discontinuous  |
|        | Loras                                | In expansion   |
|        | Lutinière                            | Not recorded   |
|        | Moselotte                            | Not recorded   |
|        | Tourbière de Narbief                 | Discontinuous  |
|        | col du Petit Saint Bernard           | Not recorded   |
|        | La Beuffarde                         | Not recorded   |
|        | Le Grand Lemps                       | Continuous     |
|        | Tourbière de Censeau                 | Not recorded   |
|        | Tourbière du Mou de Pleure (Francia) | Not recorded   |
|        | Tourbières des Granges des Chavants  | Not recorded   |
|        | Ampoix                               | Discontinuous  |
|        | Champ Gazon                          | Not recorded   |
|        | Etang Bouquin                        | Discontinuous  |
|        | Etang de Cheylade                    | Continuous     |
|        | Etang de la Villetelle               | Not recorded   |
|        | La Taphanel                          | Discontinuous  |
|        | Lac du Bouchet                       | Not recorded   |
|        | Lac du Mont de Belier                | Not recorded   |
|        | Le Grand Montarnu                    | Not recorded   |
|        | Le Jolan                             | Not recorded   |
|        | Le Miroir                            | Not recorded   |
|        | Les Chaux de Coudert                 | Continuous     |
|        | Marais de Maurepas                   | Not recorded   |
|        | Montbé                               | Not recorded   |
|        | Moulin de Prugnolas                  | Discontinuous  |
|        | Nataloup                             | Not recorded   |
|        | Peyre peat-bog                       | Not recorded   |
|        | Port des Lamberts                    | Discontinuous  |
|        | Saint-Benoit-sur-Loire               | In expansion   |
|        | Sources de l'Yonne                   | Not recorded   |
|        | Tourbière de Longeyroux              | Not recorded   |
|        | Tourbière de Roussy                  | Not recorded   |
|        | Tourbière des Dauges                 | Not recorded   |

|       |                                |               |
|-------|--------------------------------|---------------|
|       | La Baforière                   | Continuous    |
|       | Tourbière de Chabannes         | Not recorded  |
|       | Font Carluze                   | Not recorded  |
|       | Ancenis                        | Not recorded  |
|       | Basse-Ville                    | Not recorded  |
|       | Bois-Jésus                     | Not recorded  |
|       | Carquefou                      | Not recorded  |
|       | Caves d'Amont                  | Discontinuous |
|       | Cinq-Mars-la-Pile              | In expansion  |
|       | Cordemais                      | Not recorded  |
|       | Corniche de Pail               | Not recorded  |
|       | Jaunay                         | Not recorded  |
|       | La Bergerie en Charron         | Not recorded  |
|       | La Caudelais                   | Not recorded  |
|       | La Grande Brousse              | Not recorded  |
|       | La Grange                      | Not recorded  |
|       | La Prairie du Cassoir          | Not recorded  |
|       | La boire Torse                 | Not recorded  |
|       | Le Gesvres                     | Not recorded  |
|       | Le Marais de la Perge          | Not recorded  |
|       | Logne                          | Not recorded  |
|       | Marais de Champtocé            | Not recorded  |
|       | Marais de Mazerolles           | Not recorded  |
|       | Marais de Munet                | Not recorded  |
|       | Marais de Méron                | Not recorded  |
|       | Marais de la Poupinière        | Not recorded  |
|       | Marais des Bourbes             | Not recorded  |
|       | Oudon                          | Discontinuous |
|       | Pas du Gu                      | Not recorded  |
|       | Petit Marais                   | Discontinuous |
|       | Riabelais                      | Not recorded  |
|       | Saint Viaud Contin             | Not recorded  |
|       | Tourbière de Nay               | Not recorded  |
|       | Tourbière de Parçay-sur-Vienne | Not recorded  |
|       | Vertonne                       | Discontinuous |
|       | Col Luitel                     | Continuous    |
|       | Col des Lauzes                 | Continuous    |
|       | Correo                         | Not recorded  |
|       | Embouchac                      | Discontinuous |
|       | Etang d'Ouveillan              | Not recorded  |
|       | Fangeas                        | Not recorded  |
|       | Grand Ratz le Pellet           | Not recorded  |
|       | Lac Long Inférieur             | Discontinuous |
|       | Lac Miroir                     | Discontinuous |
|       | Lac Saint Léger                | Not recorded  |
|       | Lac de Praver                  | In expansion  |
|       | Lac des Boites                 | Continuous    |
|       | Lac du Lauzon                  | In expansion  |
|       | Lake Racou                     | Not recorded  |
|       | Pelléautier                    | Not recorded  |
|       | Pré Rond                       | Not recorded  |
|       | Sabbion                        | Discontinuous |
|       | Saint Hilaire du Rosier        | Discontinuous |
|       | Saint Julien de Ratz           | Continuous    |
|       | Saint Sixte                    | Discontinuous |
|       | Tourbière de Gatimort          | Not recorded  |
|       | Tourbière de Mont Sec          | Discontinuous |
|       | Tourbière de Raux              | Not recorded  |
|       | Tourbière de la Lande          | Not recorded  |
|       | Tourbière des Narses Mortes    | Not recorded  |
|       | Tourbière du Peschio           | Not recorded  |
| Spain | Albufera Alcudia               | Discontinuous |
|       | Algendar                       | Not recorded  |
|       | Cala Galdana                   | Discontinuous |
|       | Antas                          | Not recorded  |
|       | Laguna Salada Chiprana         | Not recorded  |
|       | Atxuri                         | Not recorded  |
|       | Cueto de la Avellanosa         | Continuous    |
|       | Laguna de la Roya              | Not recorded  |
|       | PRD-4                          | Discontinuous |
|       | Puerto de Los Tornos           | Not recorded  |
|       | Saldropo                       | Not recorded  |
|       | Sanabria Marsh                 | Not recorded  |
|       | El Payo                        | Discontinuous |
|       | Lanzahíta                      | Continuous    |
|       | Patateros bog                  | Not recorded  |

|               |          |                        |               |
|---------------|----------|------------------------|---------------|
|               |          | Peña Negra             | Not recorded  |
|               |          | Quintanar de la Sierra | Not recorded  |
|               |          | Salada Pequeña         | Not recorded  |
|               | Portugal | Charco da Candieira    | Not recorded  |
|               |          | Lagoa Comprida 2       | Not recorded  |
|               |          | Lagoa Travessa I       | Not recorded  |
|               | Syria    | Bouara                 | Not recorded  |
|               |          | Ghab                   | Not recorded  |
|               | Israel   | Dead Sea-Ze'elim       | Discontinuous |
|               |          | Birkat Ram             | Continuous    |
|               |          | Lake Kinneret          | Discontinuous |
|               |          | Hula Valley            | Discontinuous |
|               | Iran     | Gomishan               | Discontinuous |
|               |          | Lake Almalou           | Discontinuous |
|               |          | Lake Zeribar           | Discontinuous |
|               |          | Maharlou Lake          | Continuous    |
|               | Georgia  | Adange                 | Discontinuous |
|               |          | Amtkel                 | Discontinuous |
|               |          | Gagra                  | Not recorded  |
|               |          | Lagodekhi              | Not recorded  |
|               |          | Sibista                | Not recorded  |
|               |          | Supsa River            | Not recorded  |
|               |          | Lake Bazaleti          | Continuous    |
|               |          | Imera lake             | Continuous    |
|               | Albania  | Lake Maliq             | Discontinuous |
| 2 – 1.5 Ka BP | Turkey   | Lake Manyas            | Continuous    |
|               |          | Marmara Sea            | Continuous    |
|               |          | Abant Gölü             | Not recorded  |
|               |          | Beyschir Gölü I        | Continuous    |
|               |          | Göhlisar Gölü I        | Continuous    |
|               |          | Göhlisar Gölü II       | Continuous    |
|               |          | Hoyran Gölü            | Continuous    |
|               |          | Kararmik Batakligi     | Not recorded  |
|               |          | Köycegiz Gölü          | Discontinuous |
|               |          | Ova Gölü               | Not recorded  |
|               |          | Pinarbasi              | Continuous    |
|               |          | Söğüt Gölü             | Continuous    |
|               |          | Sagalassos-Gravgaz     | Continuous    |
|               |          | Ladik Gölü             | Continuous    |
|               |          | Lake Van               | In expansion  |
|               | Greece   | Kournas                | Discontinuous |
|               |          | Paiko                  | Continuous    |
|               |          | Lailias                | In expansion  |
|               |          | Elatia-Rhodopes        | Continuous    |
|               |          | Kastoria               | Continuous    |
|               |          | Orestias               | Continuous    |
|               |          | Khimaditis III         | Continuous    |
|               |          | Vegoritis              | Continuous    |
|               |          | Edessa                 | Continuous    |
|               |          | Litochoro              | Continuous    |
|               |          | Lerna                  | Continuous    |
|               |          | Trikhonis              | Continuous    |
|               |          | Ioannina I             | Not recorded  |
|               |          | Ioannina II            | Not recorded  |
|               |          | Halos                  | Not recorded  |
|               |          | Xinias                 | Continuous    |
|               |          | Voukaria               | Not recorded  |
|               |          | Pertouli               | Not recorded  |
|               |          | Myrtoon Basin          | Continuous    |
|               |          | Beliya Kanton          | Continuous    |
|               | Bulgary  | Kupena II              | Not recorded  |
|               |          | Ribno I                | Continuous    |
|               |          | Popovo Ezero           | Not recorded  |
|               |          | Mutorog                | In expansion  |
|               |          | Trilistnika            | Continuous    |
|               |          | Suho Ezero             | Discontinuous |
|               |          | Sozopol                | Continuous    |
|               |          | Arkutino I             | Not recorded  |
|               |          | Arkutino II            | Not recorded  |
|               |          | Black Sea South        | Not recorded  |
|               |          | Black Sea Southwest    | Discontinuous |
|               |          | Duranunlak II          | Not recorded  |
|               |          | Duranunlak I           | Not recorded  |
|               |          | Shabla-Ezeretz         | Not recorded  |
|               |          | Varna I                | Discontinuous |

|                |                            |               |
|----------------|----------------------------|---------------|
|                | Varna II                   | Discontinuous |
|                | Srebarna                   | Continuous    |
|                | Mire Garvan                | In expansion  |
|                | Osogovo                    | Continuous    |
|                | Begbunar                   | Continuous    |
|                | Sredna Gora                | Not recorded  |
|                | Straldzha mire             | Discontinuous |
|                | Tchokljovo Marsh           | Not recorded  |
|                | Vitosh                     | Not recorded  |
| Romania        | Avrig I                    | Not recorded  |
|                | Avrig II                   | Not recorded  |
|                | Mohos                      | Not recorded  |
|                | Luci                       | Discontinuous |
|                | Bisoca                     | Not recorded  |
|                | Calinease                  | Not recorded  |
|                | Semenic                    | Not recorded  |
|                | Stereioiu                  | Not recorded  |
| Hungary        | Alsópáhok                  | Continuous    |
|                | Balaton Centre             | In expansion  |
|                | Balaton Northeast          | Continuous    |
|                | Balaton Southwest          | Not recorded  |
|                | Nagy-Mohos                 | Not recorded  |
|                | Pölöske                    | Not recorded  |
|                | Pötréte                    | Discontinuous |
|                | Szigliget                  | Continuous    |
| Slovakia       | Bobrov                     | Not recorded  |
|                | Zlatnicka Dolina           | Not recorded  |
|                | Strbské pleso              | Not recorded  |
|                | Tlstá hora                 | Continuous    |
| Czech Republic | Dvur Ansov                 | Not recorded  |
|                | Olbramovice                | Discontinuous |
|                | Vracov                     | Not recorded  |
|                | Palasiny                   | Not recorded  |
|                | Kozli                      | Not recorded  |
|                | Rezabinec                  | Not recorded  |
|                | Borkovicka blata           | Not recorded  |
|                | Branna                     | Discontinuous |
|                | Loucky                     | Not recorded  |
|                | Chrást                     | Not recorded  |
|                | Velka niva                 | Not recorded  |
|                | Malá niva                  | Not recorded  |
|                | Mrtv8 luh                  | Not recorded  |
|                | Stráženská slat            | Discontinuous |
|                | Komoranské jezero          | Not recorded  |
|                | Dolskym                    | Not recorded  |
|                | Na bahne                   | Not recorded  |
|                | Velky Ded                  | Not recorded  |
|                | Velky Maj                  | Continuous    |
|                | Pancavská louka            | Not recorded  |
|                | Pryskyrin8 dul             | Not recorded  |
|                | Tpské raseliniste Mire     | Not recorded  |
|                | Tpské raseliniste Mire II  | Not recorded  |
|                | Tpské raseliniste Mire III | Discontinuous |
| Ukraina        | Dovjok Swamp               | Not recorded  |
|                | Maly Podleski              | Discontinuous |
|                | Pecheniya                  | Discontinuous |
| Croatia        | Bokanjacko                 | Discontinuous |
|                | Mljet                      | Continuous    |
| Poland         | Bledowo Lake               | Not recorded  |
|                | Giecz                      | Not recorded  |
|                | Lake Gosciaz               | Not recorded  |
|                | Lake Skrzetuszewskie       | Not recorded  |
|                | Slawsko                    | Not recorded  |
|                | Swietokrzyskie Lake        | Not recorded  |
|                | Cergowa Gora               | Not recorded  |
|                | Godziszewskie Lake         | Not recorded  |
|                | Lake Mikolajki             | Not recorded  |
|                | Puscizna Rekowianska       | Not recorded  |
| Austria        | Buntes Moor                | In expansion  |
|                | Dortmunder Hütte           | Not recorded  |
|                | Franz Senn-Hütte           | Not recorded  |
|                | Egelsee                    | In expansion  |
|                | Gerlos                     | Continuous    |
|                | Giering                    | Not recorded  |
|                | Gradenmoos                 | Not recorded  |
|                | Grünau Moor                | Not recorded  |

|             |                                       |               |
|-------------|---------------------------------------|---------------|
|             | Lindenmoos                            | Discontinuous |
|             | Mieminger See                         | Not recorded  |
|             | Moor Alpenrose                        | Not recorded  |
|             | Rotmoos Obergurgl                     | Not recorded  |
|             | Schwarzsee Reschenscheideck           | Discontinuous |
|             | Schwemm                               | Not recorded  |
|             | Seefeldler See                        | In expansion  |
|             | Zirbenwaldmoor                        | Discontinuous |
|             | Wasenmoos beim Zellhof                | Not recorded  |
|             | Grosses Überling Schattseit-Moor      | Not recorded  |
|             | Dürrenecksee-Moor                     | Not recorded  |
|             | Fuchsschwanzmoos                      | Not recorded  |
|             | Fuschlsee                             | Not recorded  |
| Germany     | Ahlenmoor                             | Not recorded  |
|             | Ahlequellmoor                         | Not recorded  |
|             | Bruchberg                             | Not recorded  |
|             | Lüttersee                             | Not recorded  |
|             | Silberhohl                            | Not recorded  |
|             | Sonnenberger Moor                     | Not recorded  |
|             | Dunum (Hilliges Moor)                 | Not recorded  |
|             | Felchensee                            | Not recorded  |
|             | Großer Krebssee                       | Not recorded  |
|             | Löddigsee                             | Not recorded  |
|             | Wachel 3                              | Not recorded  |
|             | Brentenlohe                           | Not recorded  |
|             | Bruckmisse                            | Not recorded  |
|             | Glaswaldsee                           | Discontinuous |
|             | Herrenwiesser see                     | Discontinuous |
|             | Durchenbergried                       | Discontinuous |
|             | Feuenried                             | Not recorded  |
|             | Gaienhofen                            | Not recorded  |
|             | Hornstaad-Bodensee                    | In expansion  |
|             | Huzenbacher See                       | Discontinuous |
|             | Mindelsee                             | In expansion  |
|             | Oberderdingen-Großvillars             | Not recorded  |
|             | Steerenmoos                           | Not recorded  |
|             | Wilder See beim Ruhestein             | Not recorded  |
| Switzerland | Derrière les Embreux                  | Not recorded  |
|             | Etang de la Gruère                    | Not recorded  |
|             | Le Loclat                             | Continuous    |
|             | Lobsigensee                           | Continuous    |
|             | Montilier                             | Continuous    |
|             | Aegelsee                              | Not recorded  |
|             | Amsoldingersee                        | Not recorded  |
|             | Bachalpsee                            | Discontinuous |
|             | Hinterburgseeli                       | In expansion  |
|             | Hängstli                              | Discontinuous |
|             | Linden                                | Discontinuous |
|             | Oberaar                               | Not recorded  |
|             | Rotsee                                | In expansion  |
|             | Schwarzsee FR                         | Discontinuous |
|             | Sägistalsee                           | Discontinuous |
|             | Stüftenenegg                          | Discontinuous |
|             | Aletschwald                           | In expansion  |
|             | Alp Lüsga Belalp 1                    | Not recorded  |
|             | Alpi di Robièi Val Bavona             | Not recorded  |
|             | Alpi di Robièi Val Bavona Bodenprofil | Not recorded  |
|             | Bitsch-Naters                         | In expansion  |
|             | Eggen ob Blatten                      | Not recorded  |
|             | Etang d'y Cor Montana                 | In expansion  |
|             | Etang de Luissel Bex                  | Continuous    |
|             | Gondo Alpjen                          | Discontinuous |
|             | Grächen See                           | Not recorded  |
|             | Hopschensee                           | Continuous    |
|             | Mittlere Hellelen                     | In expansion  |
|             | Pillon Gsteig-Diablerets              | Not recorded  |
|             | Wallbach Lenk                         | Not recorded  |
|             | Mont Roux                             | Not recorded  |
|             | Gamperfin                             | Not recorded  |
|             | Creux de Croue                        | Continuous    |
|             | Motta Naluns                          | Discontinuous |
|             | Praz Rodet                            | Discontinuous |
| Italy       | Dura-Moor                             | In expansion  |
|             | Malschötscher Hotter                  | Continuous    |
|             | Rinderplatz                           | Not recorded  |
|             | Schwarzsee                            | In expansion  |

|        |                                      |                |
|--------|--------------------------------------|----------------|
|        | Sommersüss                           | Not recorded   |
|        | Dossaccio Bormio                     | Continuous     |
|        | Lac de Lod                           | Not recorded   |
|        | Lac de Villa                         | Continuous     |
|        | Lac du Verney-Dessus                 | Discontinuous  |
|        | Torveraz                             | Not recorded   |
|        | Tourbière de Pilaz                   | Continuous     |
|        | Tourbière de Santa Anna              | Not recorded   |
|        | Laghi dell'Orgials                   | Discontinuous  |
|        | Lago Piccolo di Avigliana            | Continuous     |
|        | Ortasee                              | Discontinuous  |
|        | Ortasee II                           | In expansion   |
|        | Refugio Mondovi                      | Continuous     |
|        | Selle di Carnino                     | Not recorded   |
|        | Torbiera del Biecai                  | Continuous     |
|        | Lago della Costa                     | Continuous     |
|        | Lago Padule                          | Discontinuous  |
|        | Colfiorito                           | In expansion   |
|        | Lago Pratignano                      | Not recorded   |
|        | Ospitale                             | Not recorded   |
|        | Pavullo                              | Discontinuous  |
|        | Parma                                | Discontinuous  |
|        | Lago di Martignano                   | Discontinuous  |
|        | Lago di Vico                         | Continuous     |
|        | Lago Albano                          | Continuous     |
|        | Lago di Nemi                         | Continuous     |
|        | Central Adriatic Sea                 | Continuous     |
|        | Salerno Bay                          | Discontinuous  |
|        | Lago Grande di Monticchio LGM        | In expansion   |
|        | Bradano Valley                       | In contraction |
| France | Aronde                               | Not recorded   |
|        | Auneau                               | Not recorded   |
|        | Baie de Seine estuary                | Continuous     |
|        | Change-Glatinier                     | Discontinuous  |
|        | Coulvain                             | Not recorded   |
|        | La Verderie                          | Not recorded   |
|        | La Vie                               | Not recorded   |
|        | Lavaré                               | Not recorded   |
|        | Le Fourneau                          | Not recorded   |
|        | Lingreville                          | Not recorded   |
|        | Malingue                             | In expansion   |
|        | Marais de Kerduel                    | Not recorded   |
|        | Marais de Lisle                      | Not recorded   |
|        | Marais de Marchesieux                | Not recorded   |
|        | Mobeche Forest                       | Not recorded   |
|        | Moulin de Thévalles                  | Not recorded   |
|        | Pezou                                | Not recorded   |
|        | Rimarde                              | Not recorded   |
|        | Saint-Ursin                          | Not recorded   |
|        | Serrent                              | Not recorded   |
|        | Grozon                               | In expansion   |
|        | Hières sur Amby                      | Discontinuous  |
|        | Lac Cerin                            | Continuous     |
|        | Lac de Clairvaux                     | Not recorded   |
|        | Lac de Malpas                        | Discontinuous  |
|        | Lake of Annecy                       | In expansion   |
|        | Loras                                | Continuous     |
|        | Lutinière                            | Discontinuous  |
|        | Moselotte                            | Discontinuous  |
|        | Tourbière de Narbief                 | In expansion   |
|        | col du Petit Saint Bernard           | Discontinuous  |
|        | La Beuffarde                         | Discontinuous  |
|        | Le Grand Lemps                       | Continuous     |
|        | Tourbière de Censeau                 | Not recorded   |
|        | Tourbière du Mou de Pleure (Francia) | Not recorded   |
|        | Tourbières des Granges des Chavants  | Not recorded   |
|        | Ampoix                               | Not recorded   |
|        | Champ Gazon                          | Not recorded   |
|        | Etang Bouquin                        | Not recorded   |
|        | Etang de Cheylade                    | In contraction |
|        | Etang de la Villetelle               | Not recorded   |
|        | Lac du Bouchet                       | Not recorded   |
|        | Lac du Mont de Belier                | Not recorded   |
|        | Le Grand Montarnu                    | Not recorded   |
|        | Le Jolan                             | Not recorded   |
|        | Le Miroir                            | Not recorded   |

|       |                                |                |
|-------|--------------------------------|----------------|
|       | Les Chaux de Coudert           | Continuous     |
|       | Marais de Maurepas             | Discontinuous  |
|       | Mars                           | Discontinuous  |
|       | Montbé                         | Discontinuous  |
|       | Moulin de Prugnolas            | Discontinuous  |
|       | Nataloup                       | Not recorded   |
|       | Peyre peat-bog                 | Not recorded   |
|       | Port des Lamberts              | Not recorded   |
|       | Saint-Benoit-sur-Loire         | Continuous     |
|       | Sources de l'Yonne             | Discontinuous  |
|       | Tourbière de Longeyroux        | Discontinuous  |
|       | Tourbière de Roussy            | Discontinuous  |
|       | Tourbière des Dauges           | Continuous     |
|       | La Baforière                   | Continuous     |
|       | Tourbière de Chabannes         | Not recorded   |
|       | Font Carluze                   | Not recorded   |
|       | Ancenis                        | Discontinuous  |
|       | Basse-Ville                    | Not recorded   |
|       | Bois-Jésus                     | Not recorded   |
|       | Carquefou                      | Discontinuous  |
|       | Caves d'Amont                  | Not recorded   |
|       | Cinq-Mars-la-Pile              | Continuous     |
|       | Cordemais                      | Discontinuous  |
|       | Corniche de Pail               | Not recorded   |
|       | Jaunay                         | Not recorded   |
|       | La Bergerie en Charron         | Not recorded   |
|       | La Caudelais                   | In expansion   |
|       | La Grande Brousse              | Discontinuous  |
|       | La Grange                      | Not recorded   |
|       | La Prairie du Cassoir          | Not recorded   |
|       | La boire Torse                 | In expansion   |
|       | Le Gesvres                     | Not recorded   |
|       | Le Marais de la Perge          | Not recorded   |
|       | Logne                          | Not recorded   |
|       | Marais de Champtocé            | Not recorded   |
|       | Marais de Mazerolles           | Not recorded   |
|       | Marais de Munet                | Not recorded   |
|       | Marais de Méron                | Discontinuous  |
|       | Marais de la Poupinière        | Not recorded   |
|       | Marais des Bourbes             | Discontinuous  |
|       | Oudon                          | Discontinuous  |
|       | Pas du Gu                      | Not recorded   |
|       | Riabelais                      | Discontinuous  |
|       | Saint Viaud Contin             | Discontinuous  |
|       | Tourbière de Nay               | Not recorded   |
|       | Tourbière de Parçay-sur-Vienne | Not recorded   |
|       | Vertonne                       | Not recorded   |
|       | Correo                         | Discontinuous  |
|       | Embouchac                      | Discontinuous  |
|       | Etang d'Ouveillan              | Discontinuous  |
|       | Fangeas                        | Not recorded   |
|       | Grand Ratz le Pellet           | Not recorded   |
|       | Lac Long Inférieur             | Not recorded   |
|       | Lac Saint Léger                | Discontinuous  |
|       | Lac de Praver                  | Continuous     |
|       | Lac des Boites                 | Continuous     |
|       | Lac du Lauzon                  | In contraction |
|       | Lake Racou                     | Not recorded   |
|       | Pelléautier                    | Not recorded   |
|       | Pré Rond                       | Not recorded   |
|       | Sabbion                        | Not recorded   |
|       | Saint Hilaire du Rosier        | Discontinuous  |
|       | Saint Julien de Ratz           | Continuous     |
|       | Saint Sixte                    | In expansion   |
|       | Tourbière de Gatimort          | Not recorded   |
|       | Tourbière de Mont Sec          | Not recorded   |
|       | Tourbière de Raux              | Discontinuous  |
|       | Tourbière de la Lande          | Not recorded   |
|       | Tourbière des Narses Mortes    | Discontinuous  |
|       | Tourbière du Peschio           | Not recorded   |
|       | Albufera Alcludia              | Discontinuous  |
|       | Cala Galdana                   | Not recorded   |
|       | Antas                          | Not recorded   |
|       | Laguna Salada Chiprana         | Continuous     |
|       | Atxuri                         | Not recorded   |
|       | Cueto de la Avellanosa         | Continuous     |
| Spain |                                |                |



|               |          |                        |                |
|---------------|----------|------------------------|----------------|
|               |          | Laguna de la Roya      | Discontinuous  |
|               |          | PRD-4                  | Not recorded   |
|               |          | Puerto de Los Tornos   | Not recorded   |
|               |          | Saldropo               | Not recorded   |
|               |          | Sanabria Marsh         | Not recorded   |
|               |          | El Payo                | Not recorded   |
|               |          | Lanzahíta              | Continuous     |
|               |          | Patateros bog          | Not recorded   |
|               |          | Peña Negra             | Discontinuous  |
|               |          | Puerto de Serranillos  | Not recorded   |
|               |          | Quintanar de la Sierra | Not recorded   |
|               |          | Salada Pequeña         | Not recorded   |
|               | Portugal | Charco da Candieira    | Not recorded   |
|               |          | Lagoa Comprida 2       | Not recorded   |
|               |          | Lagoa Travessa I       | Not recorded   |
|               | Syria    | Bouara                 | Discontinuous  |
|               |          | Ghab                   | Not recorded   |
|               | Israel   | Dead Sea-Ze'elim       | Discontinuous  |
|               |          | Birkat Ram             | Continuous     |
|               |          | Lake Kinneret          | Discontinuous  |
|               |          | Hula Valley            | Discontinuous  |
|               | Iran     | Gomishan               | Discontinuous  |
|               |          | Lake Almalou           | In expansion   |
|               |          | Lake Zeribar           | Discontinuous  |
|               |          | Maharlou Lake          | Continuous     |
|               | Georgia  | Adange                 | Discontinuous  |
|               |          | Amtkel                 | Discontinuous  |
|               |          | Gagra                  | Not recorded   |
|               |          | Lagodekhi              | Not recorded   |
|               |          | Sibista                | Discontinuous  |
|               |          | Supsa River            | Not recorded   |
|               |          | Lake Bazaleti          | Continuous     |
|               |          | Imera lake             | Continuous     |
|               | Albania  | Lake Maliq             | Not recorded   |
| 1.5 – 1 Ka BP | Turkey   | Lake Manyas            | Continuous     |
|               |          | Marmara Sea            | Continuous     |
|               |          | Abant Gölü             | Continuous     |
|               |          | Beyşehir Gölü I        | In contraction |
|               |          | Göhlisar Gölü I        | Continuous     |
|               |          | Göhlisar Gölü II       | In contraction |
|               |          | Hoyran Gölü            | Continuous     |
|               |          | Kararmik Batakligi     | Not recorded   |
|               |          | Köycegiz Gölü          | Discontinuous  |
|               |          | Ova Gölü               | Continuous     |
|               |          | Pınarbasi              | Continuous     |
|               |          | Söğüt Gölü             | In contraction |
|               |          | Sagalassos-Gravgaz     | In contraction |
|               |          | Ladik Gölü             | Continuous     |
|               |          | Lake Van               | Continuous     |
|               | Greece   | Kourmas                | In expansion   |
|               |          | Asi Gonia II           | Not recorded   |
|               |          | Asi Gonia I            | Not recorded   |
|               |          | Paiko                  | Continuous     |
|               |          | Lailias                | Continuous     |
|               |          | Elatia-Rhodopes        | Continuous     |
|               |          | Orestias               | Continuous     |
|               |          | Khimaditis III         | Continuous     |
|               |          | Vegoritis              | Continuous     |
|               |          | Edessa                 | Continuous     |
|               |          | Litochoro              | Continuous     |
|               |          | Lerna                  | Continuous     |
|               |          | Trikhonis              | Continuous     |
|               |          | Ioannina I             | Discontinuous  |
|               |          | Ioannina II            | Not recorded   |
|               |          | Halos                  | Not recorded   |
|               |          | Xinias                 | Continuous     |
|               |          | Voukaria               | Not recorded   |
|               |          | Pertouli               | In expansion   |
|               |          | Myrtoon Basin          | Continuous     |
|               | Bulgary  | Beliya Kanton          | Continuous     |
|               |          | Kupena II              | Not recorded   |
|               |          | Ribno I                | Continuous     |
|               |          | Popovo Ezero           | Discontinuous  |
|               |          | Mutorog                | Continuous     |
|               |          | Trilistnika            | Continuous     |

|                |                            |               |
|----------------|----------------------------|---------------|
|                | Suho Ezero                 | In expansion  |
|                | Sozopol                    | Continuous    |
|                | Arkutino II                | Not recorded  |
|                | Black Sea South            | Discontinuous |
|                | Black Sea Southwest        | Discontinuous |
|                | Duranunlak II              | Not recorded  |
|                | Shabla-Ezeretz             | Discontinuous |
|                | Varna I                    | Not recorded  |
|                | Srebarna                   | Continuous    |
|                | Mire Garvan                | Continuous    |
|                | Osogovo                    | Continuous    |
|                | Begbunar                   | Continuous    |
|                | Sredna Gora                | Discontinuous |
|                | Straldzha mire             | Not recorded  |
|                | Tchokljovo Marsh           | Discontinuous |
|                | Vitosha                    | Not recorded  |
| Romania        | Avrig I                    | Discontinuous |
|                | Avrig II                   | Not recorded  |
|                | Mohos                      | Not recorded  |
|                | Luci                       | Discontinuous |
|                | Bisoca                     | Not recorded  |
|                | Calinease                  | Not recorded  |
|                | Semenic                    | Not recorded  |
|                | Stereoiu                   | Not recorded  |
| Hungary        | Alsópáhok                  | Continuous    |
|                | Balaton Centre             | Continuous    |
|                | Balaton Northeast          | Continuous    |
|                | Balaton Southwest          | In expansion  |
|                | Nagy-Mohos                 | Not recorded  |
|                | Pölöske                    | Discontinuous |
|                | Pötréte                    | Not recorded  |
|                | Szigliget                  | Continuous    |
| Slovakia       | Bobrov                     | Not recorded  |
|                | Zlatnicka Dolina           | Not recorded  |
|                | Strbské pleso              | Not recorded  |
|                | Tlstá hora                 | Continuous    |
| Czech Republic | Královec                   | Discontinuous |
|                | Machová                    | Discontinuous |
|                | Olbramovice                | Not recorded  |
|                | Vracov                     | In expansion  |
|                | Palasiny                   | Not recorded  |
|                | Kozli                      | Discontinuous |
|                | Rezabinec                  | Not recorded  |
|                | Borkovicka blata           | Not recorded  |
|                | Branna                     | Discontinuous |
|                | Loucky                     | Discontinuous |
|                | Chrát                      | Not recorded  |
|                | Velka niva                 | Not recorded  |
|                | Malá niva                  | Not recorded  |
|                | Mrtv8 luh                  | Not recorded  |
|                | Stráženská slat            | Not recorded  |
|                | Komoranské jezero          | Discontinuous |
|                | Dolskym                    | Discontinuous |
|                | Na bahne                   | Not recorded  |
|                | Velky Ded                  | Continuous    |
|                | Velky Maj                  | Continuous    |
|                | Pancavská louka            | Not recorded  |
|                | Pryskyrin8 dul             | Not recorded  |
|                | Tpské raseliniste Mire     | Not recorded  |
|                | Tpské raseliniste Mire II  | Not recorded  |
|                | Tpské raseliniste Mire III | Discontinuous |
| Ukraina        | Dovjok Swamp               | Discontinuous |
|                | Maly Podleski              | Not recorded  |
|                | Pecheniya                  | Discontinuous |
|                | Yukharina Balka            | Continuous    |
| Croatia        | Bokanjacko                 | Discontinuous |
|                | MJjet                      | Continuous    |
| Poland         | Bledowo Lake               | Not recorded  |
|                | Giecz                      | Discontinuous |
|                | Lake Gosciaz               | Not recorded  |
|                | Lake Skrzetuszewskie       | Discontinuous |
|                | Slawsko                    | Not recorded  |
|                | Swietokrzyskie Lake        | Not recorded  |
|                | Cergowa Gora               | Not recorded  |
|                | Godziszewskie Lake         | Not recorded  |
|                | Lake Mikolajki             | Not recorded  |

|                                       |                                  |                      |               |
|---------------------------------------|----------------------------------|----------------------|---------------|
| Austria                               | Puscizna Rekowianska             | Not recorded         |               |
|                                       | Buntes Moor                      | Continuous           |               |
|                                       | Dortmunder Hütte                 | Discontinuous        |               |
|                                       | Franz Senn-Hütte                 | Continuous           |               |
|                                       | Egelsee                          | Continuous           |               |
|                                       | Gerlos                           | Continuous           |               |
|                                       | Giering                          | Not recorded         |               |
|                                       | Gradenmoos                       | Continuous           |               |
|                                       | Grünau Moor                      | Discontinuous        |               |
|                                       | Lindenmoos                       | Not recorded         |               |
|                                       | Mieminger See                    | Continuous           |               |
|                                       | Moor Alpenrose                   | Not recorded         |               |
|                                       | Rotmoos Obergurgl                | Not recorded         |               |
|                                       | Schwarzsee Reschenscheideck      | Not recorded         |               |
|                                       | Schwemm                          | Continuous           |               |
|                                       | Seefeldler See                   | In contraction       |               |
|                                       | Zirbenwaldmoor                   | Discontinuous        |               |
|                                       | Wasenmoos beim Zellhof           | Not recorded         |               |
|                                       | Grosses Überling Schattseit-Moor | Not recorded         |               |
|                                       | Dürrenecksee-Moor                | Not recorded         |               |
|                                       | Fuchsschwanzmoos                 | Not recorded         |               |
| Germany                               | Fuschlse                         | Continuous           |               |
|                                       | Ahlenmoor                        | Discontinuous        |               |
|                                       | Ahlequellmoor                    | Not recorded         |               |
|                                       | Bruchberg                        | Discontinuous        |               |
|                                       | Lüttersee                        | Discontinuous        |               |
|                                       | Silberhohl                       | Discontinuous        |               |
|                                       | Sonnenberger Moor                | Not recorded         |               |
|                                       | Dunum (Hilliges Moor)            | Not recorded         |               |
|                                       | Felchsee                         | Not recorded         |               |
|                                       | Großer Krebssee                  | Discontinuous        |               |
|                                       | Löddigsee                        | Not recorded         |               |
|                                       | Wachel 3                         | Not recorded         |               |
|                                       | Brentenlohe                      | Not recorded         |               |
|                                       | Bruckmisse                       | Not recorded         |               |
|                                       | Glaswaldsee                      | In expansion         |               |
|                                       | Herrenwiesser see                | In expansion         |               |
|                                       | Durchenbergried                  | Discontinuous        |               |
|                                       | Feuenried                        | Discontinuous        |               |
|                                       | Gaienhofen                       | Discontinuous        |               |
|                                       | Hornstaad-Bodensee               | Continuous           |               |
|                                       | Mindelsee                        | Continuous           |               |
|                                       | Oberderdingen-Großvillars        | Discontinuous        |               |
|                                       | Stierenmoos                      | Discontinuous        |               |
|                                       | Wilder See beim Ruhestein        | In expansion         |               |
|                                       | Switzerland                      | Derrière les Embreux | Not recorded  |
|                                       |                                  | Etang de la Gruère   | Discontinuous |
|                                       |                                  | Le Loclat            | Continuous    |
| Lobsigensee                           |                                  | Continuous           |               |
| Montilier                             |                                  | Continuous           |               |
| Aegelsee                              |                                  | Not recorded         |               |
| Amsoldingensee                        |                                  | Discontinuous        |               |
| Bachalpsee                            |                                  | In expansion         |               |
| Hinterburgseeli                       |                                  | Continuous           |               |
| Hängstli                              |                                  | Not recorded         |               |
| Linden                                |                                  | Discontinuous        |               |
| Oberaar                               |                                  | Discontinuous        |               |
| Rotsee                                |                                  | Continuous           |               |
| Schwarzsee FR                         |                                  | Discontinuous        |               |
| Schöpfenwaldmoor                      |                                  | Discontinuous        |               |
| Sägistalsee                           |                                  | In expansion         |               |
| Süftenenegg                           |                                  | Not recorded         |               |
| Aletschwald                           |                                  | Continuous           |               |
| Alp Lüsga Belalp 1                    |                                  | Discontinuous        |               |
| Alpi di Robièi Val Bavona             |                                  | Not recorded         |               |
| Alpi di Robièi Val Bavona Bodenprofil |                                  | Not recorded         |               |
| Bitsch-Naters                         |                                  | Continuous           |               |
| Eggen ob Blatten                      |                                  | In expansion         |               |
| Etang d'y Cor Montana                 |                                  | Continuous           |               |
| Etang de Luissel Bex                  |                                  | Continuous           |               |
| Gondo Alpjen                          |                                  | In expansion         |               |
| Grächen See                           |                                  | In expansion         |               |
| Hopschensee                           | Continuous                       |                      |               |
| Mittlere Hellelen                     | Continuous                       |                      |               |
| Pillon Gsteig-Diablerets              | In expansion                     |                      |               |
| Wallbach Lenk                         | Continuous                       |                      |               |

|                                      |                               |                       |               |
|--------------------------------------|-------------------------------|-----------------------|---------------|
|                                      | Mont Roux                     | Continuous            |               |
|                                      | Gamperfin                     | Discontinuous         |               |
|                                      | Creux de Croue                | In contraction        |               |
|                                      | Motta Naluns                  | Discontinuous         |               |
|                                      | Praz Rodet                    | Discontinuous         |               |
| Italy                                | Dura-Moor                     | Continuous            |               |
|                                      | Malschötscher Hotter          | Continuous            |               |
|                                      | Rinderplatz                   | In expansion          |               |
|                                      | Schwarzsee                    | Continuous            |               |
|                                      | Sommersüss                    | In expansion          |               |
|                                      | Lac de Lod                    | Continuous            |               |
|                                      | Lac de Villa                  | Continuous            |               |
|                                      | Lac du Verney-Dessus          | Not recorded          |               |
|                                      | Torveraz                      | Discontinuous         |               |
|                                      | Tourbière de Pilaz            | Continuous            |               |
|                                      | Tourbière de Santa Anna       | Not recorded          |               |
|                                      | Laghi dell'Orgials            | Not recorded          |               |
|                                      | Lago Piccolo di Avigliana     | Continuous            |               |
|                                      | Ortasee                       | Not recorded          |               |
|                                      | Ortasee II                    | Continuous            |               |
|                                      | Refugio Mondovi               | Continuous            |               |
|                                      | Selle di Carnino              | Not recorded          |               |
|                                      | Lago della Costa              | Continuous            |               |
|                                      | Lago Padule                   | Not recorded          |               |
|                                      | Colfiorito                    | Continuous            |               |
|                                      | Lago Pratignano               | Discontinuous         |               |
|                                      | Ospitale                      | Discontinuous         |               |
|                                      | Pavullo                       | In expansion          |               |
|                                      | Parma                         | Discontinuous         |               |
|                                      | Lago di Martignano            | Continuous            |               |
|                                      | Lago di Vico                  | Continuous            |               |
|                                      | Lago Albano                   | Continuous            |               |
|                                      | Lago di Nemi                  | Continuous            |               |
|                                      | Central Adriatic Sea          | Continuous            |               |
|                                      | Salerno Bay                   | Discontinuous         |               |
|                                      | Lago Grande di Monticchio LGM | Continuous            |               |
|                                      | Bradano Valley                | Continuous            |               |
|                                      | France                        | Aronde                | Not recorded  |
|                                      |                               | Auneau                | Discontinuous |
|                                      |                               | Baie de Seine estuary | Continuous    |
|                                      |                               | Change-Glatinier      | Discontinuous |
| Coulvain                             |                               | Discontinuous         |               |
| Fougères                             |                               | Not recorded          |               |
| La Verderie                          |                               | Discontinuous         |               |
| La Vie                               |                               | Discontinuous         |               |
| Lavaré                               |                               | Discontinuous         |               |
| Le Fourneau                          |                               | Discontinuous         |               |
| Lingreville                          |                               | Discontinuous         |               |
| Malingue                             |                               | Continuous            |               |
| Marais de Kerdual                    |                               | Discontinuous         |               |
| Marais de Lisle                      |                               | Discontinuous         |               |
| Marais de Marchesieux                |                               | Discontinuous         |               |
| Mobeche Forest                       |                               | Not recorded          |               |
| Moulin de Thévalles                  |                               | Not recorded          |               |
| Pezou                                |                               | Not recorded          |               |
| Rimarde                              |                               | In expansion          |               |
| Saint-Ursin                          |                               | Not recorded          |               |
| Serrent                              |                               | Not recorded          |               |
| Grozon                               |                               | Continuous            |               |
| Hières sur Amby                      |                               | Not recorded          |               |
| Lac Cerin                            |                               | Continuous            |               |
| Lac de Clairvaux                     |                               | Not recorded          |               |
| Lac de Malpas                        |                               | Not recorded          |               |
| Lake of Annecy                       |                               | Continuous            |               |
| Loras                                |                               | Continuous            |               |
| Lutinière                            |                               | Discontinuous         |               |
| Moselotte                            |                               | Not recorded          |               |
| Tourbière de Narbief                 |                               | Continuous            |               |
| col du Petit Saint Bernard           |                               | In expansion          |               |
| La Beuffarde                         |                               | In expansion          |               |
| Le Grand Lemps                       |                               | Continuous            |               |
| Tourbière de Censeau                 |                               | Discontinuous         |               |
| Tourbière du Mou de Pleure (Francia) |                               | Discontinuous         |               |
| Tourbières des Granges des Chavants  | Discontinuous                 |                       |               |
| Champ Gazon                          | Not recorded                  |                       |               |
| Etang Bouquin                        | Discontinuous                 |                       |               |

|                                |               |
|--------------------------------|---------------|
| Etang de la Villetelle         | In expansion  |
| Lac du Bouchet                 | Not recorded  |
| Lac du Mont de Belier          | Not recorded  |
| Le Grand Montarnu              | Not recorded  |
| Le Jolan                       | Not recorded  |
| Le Miroir                      | Not recorded  |
| Les Chaux de Coudert           | Continuous    |
| Les Nans                       | Continuous    |
| Marais de Maurepas             | Discontinuous |
| Mars                           | Discontinuous |
| Montbé                         | Discontinuous |
| Moulin de Prugnolas            | Not recorded  |
| Nataloup                       | Discontinuous |
| Peyre peat-bog                 | Continuous    |
| Port des Lamberts              | In expansion  |
| Quart du Bois                  | Discontinuous |
| Sources de l'Yonne             | Discontinuous |
| Tourbière de Longeyroux        | Not recorded  |
| Tourbière de Roussy            | In expansion  |
| Tourbière des Dauges           | Continuous    |
| La Baforière                   | Continuous    |
| Tourbière de Chabannes         | Continuous    |
| Font Carluze                   | Discontinuous |
| Ancenis                        | Not recorded  |
| Basse-Ville                    | Not recorded  |
| Bois-Jésus                     | Discontinuous |
| Carquefou                      | Discontinuous |
| Caves d'Amont                  | Discontinuous |
| Cinq-Mars-la-Pile              | Continuous    |
| Cordemais                      | In expansion  |
| Corniche de Pail               | Continuous    |
| Jaunay                         | Not recorded  |
| La Bergerie en Charron         | In expansion  |
| La Caudelais                   | Continuous    |
| La Grande Brousse              | Discontinuous |
| La Grange                      | Discontinuous |
| La Prairie du Cassoir          | Discontinuous |
| La boire Torse                 | Continuous    |
| Le Gesvres                     | Not recorded  |
| Le Marais de la Perge          | Discontinuous |
| Les Naudières                  | Discontinuous |
| Logne                          | Discontinuous |
| Marais de Champtocé            | Not recorded  |
| Marais de Mazerolles           | Discontinuous |
| Marais de Munet                | Discontinuous |
| Marais de Méron                | Discontinuous |
| Marais de la Poupinière        | Not recorded  |
| Marais des Bourbes             | Not recorded  |
| Oudon                          | In expansion  |
| Pas du Gu                      | Discontinuous |
| Riabelais                      | Discontinuous |
| Saint Viaud Contin             | Discontinuous |
| Tourbière de Nay               | Discontinuous |
| Tourbière de Parçay-sur-Vienne | Discontinuous |
| Vertonne                       | In expansion  |
| Correo                         | In expansion  |
| Etang d'Ouveillan              | Discontinuous |
| Fangeas                        | In expansion  |
| Grand Ratz le Pellet           | In expansion  |
| Lac Long Inférieur             | Discontinuous |
| Lac Saint Léger                | In expansion  |
| Lac de Praver                  | Continuous    |
| Lac des Boites                 | Continuous    |
| Lac du Lauzon                  | Continuous    |
| Lake Racou                     | Continuous    |
| Pelléautier                    | Not recorded  |
| Pré Rond                       | Not recorded  |
| Sabbion                        | Discontinuous |
| Saint Julien de Ratz           | Continuous    |
| Saint Sixte                    | Continuous    |
| Tourbière de Gatimort          | Discontinuous |
| Tourbière de Mont Sec          | Not recorded  |
| Tourbière de Raux              | In expansion  |
| Tourbière de la Lande          | Discontinuous |
| Tourbière des Narses Mortes    | Discontinuous |
| Tourbière du Peschio           | Not recorded  |

|               |                        |                           |                |
|---------------|------------------------|---------------------------|----------------|
| 1 – 0.5 Ka BP | Spain                  | Albufera Alcudia (Spain)  | Discontinuous  |
|               |                        | Cala Galdana (Spain)      | Not recorded   |
|               |                        | Antas (Spain)             | Not recorded   |
|               |                        | Laguna Salada Chiprana    | Continuous     |
|               |                        | Atxuri                    | Not recorded   |
|               |                        | Cueto de la Avellanosa    | Continuous     |
|               |                        | Laguna de la Roya         | Not recorded   |
|               |                        | PRD-4                     | Not recorded   |
|               |                        | Posidonia Lligat          | Not recorded   |
|               |                        | Puerto de Los Tornos      | Discontinuous  |
|               |                        | Saldropo                  | Not recorded   |
|               |                        | Sanabria Marsh            | Discontinuous  |
|               |                        | El Payo                   | Not recorded   |
|               |                        | Lanzahíta                 | Continuous     |
|               | Patateros bog          | Discontinuous             |                |
|               | Peña Negra             | In expansion              |                |
|               | Puerto de Serranillos  | Not recorded              |                |
|               | Quintanar de la Sierra | Not recorded              |                |
|               | Salada Pequeña         | Not recorded              |                |
|               | Portugal               | Charco da Candieira       | Discontinuous  |
|               |                        | Lagoa Comprida 2          | Not recorded   |
|               |                        | Lagoa Travessa I          | Not recorded   |
|               | Syria                  | Bouara                    | Discontinuous  |
|               |                        | Ghab                      | Not recorded   |
|               | Israel                 | Dead Sea-Ze'elim (Israel) | In contraction |
|               |                        | Birkat Ram                | Continuous     |
|               |                        | Lake Kinneret             | Discontinuous  |
|               |                        | Hula Valley               | Discontinuous  |
|               | Iran                   | Gomishan                  | Not recorded   |
|               | Lake Almalou           | Continuous                |                |
|               | Maharlou Lake          | Continuous                |                |
| Georgia       | Adange                 | Not recorded              |                |
|               | Amtkel                 | Discontinuous             |                |
|               | Gagra                  | Not recorded              |                |
|               | Khodzal                | Not recorded              |                |
|               | Lagodekhi              | Not recorded              |                |
|               | Sibista                | Discontinuous             |                |
|               | Supsa River            | Discontinuous             |                |
|               | Lake Bazaleti          | Continuous                |                |
|               | Imera lake             | Continuous                |                |
| Albania       | Lake Maliq             | Not recorded              |                |
| Turkey        | Lake Manyas            | Continuous                |                |
|               | Marmara Sea            | Continuous                |                |
|               | Abant Gölü             | Not recorded              |                |
|               | Beyşehir Gölü I        | Discontinuous             |                |
|               | Göllhisar Gölü II      | Discontinuous             |                |
|               | Höyran Gölü            | In contraction            |                |
|               | Karamik Batakligi      | Not recorded              |                |
|               | Köycegiz Gölü          | Discontinuous             |                |
|               | Ova Gölü               | Not recorded              |                |
|               | Pınarbasi              | Continuous                |                |
|               | Sögüt Gölü             | Discontinuous             |                |
|               | Sagalassos-Gravgaz     | Discontinuous             |                |
|               | Ladik Gölü             | Continuous                |                |
|               | Lake Van               | Continuous                |                |
| Greece        | Kournas                | Continuous                |                |
|               | Asi Gonia II           | Not recorded              |                |
|               | Asi Gonia I            | Discontinuous             |                |
|               | Paiko                  | Continuous                |                |
|               | Lailias                | Continuous                |                |
|               | Elatia-Rhodopes        | Continuous                |                |
|               | Orestias               | Continuous                |                |
|               | Khimaditis III         | Continuous                |                |
|               | Vegoritis              | Continuous                |                |
|               | Edessa                 | Continuous                |                |
|               | Beles Greece)          | In expansion              |                |
|               | Litochoro              | Continuous                |                |
|               | Lerna                  | Continuous                |                |
|               | Trikhonis              | Continuous                |                |
|               | Ioannina II            | In expansion              |                |
|               | Xinias                 | Continuous                |                |
|               | Voukaria               | In expansion              |                |
|               | Pertouli               | Continuous                |                |
|               | Myrtoon Basin          | Continuous                |                |
| Bulgary       | Beliya Kanton          | Continuous                |                |

|                |                            |               |
|----------------|----------------------------|---------------|
|                | Kupena II                  | Discontinuous |
|                | Ribno I                    | Continuous    |
|                | Popovo Ezero               | Not recorded  |
|                | Mutorog                    | Continuous    |
|                | Trilistnika                | Continuous    |
|                | Suho Ezero                 | Continuous    |
|                | Sozopol                    | Continuous    |
|                | Arkutino II                | Discontinuous |
|                | Black Sea South            | Not recorded  |
|                | Black Sea Southwest        | Not recorded  |
|                | Duranunlak II              | Not recorded  |
|                | Shabla-Ezeretz             | Discontinuous |
|                | Varna I                    | Not recorded  |
|                | Srebarna                   | Continuous    |
|                | Mire Garvan                | Continuous    |
|                | Osogovo                    | Continuous    |
|                | Begbunar                   | Continuous    |
|                | Sredna Gora                | Not recorded  |
|                | Straldzha mire             | Not recorded  |
|                | Vitosha                    | Continuous    |
| Romania        | Avrig I                    | Discontinuous |
|                | Avrig II                   | Discontinuous |
|                | Mohos                      | Not recorded  |
|                | Luci                       | Discontinuous |
|                | Bisoca                     | Discontinuous |
|                | Calinease                  | Not recorded  |
|                | Semic                      | Discontinuous |
|                | Stereoiu                   | Not recorded  |
| Hungary        | Alsópáhok                  | Continuous    |
|                | Balaton Centre             | Continuous    |
|                | Balaton Northeast          | Continuous    |
|                | Balaton Southwest          | Continuous    |
|                | Nagy-Mohos                 | Not recorded  |
|                | Pölöske                    | Discontinuous |
|                | Pötréte                    | Not recorded  |
|                | Szigliget                  | Continuous    |
| Slovakia       | Bobrov                     | Not recorded  |
|                | Zlatnicka Dolina           | Not recorded  |
|                | Strbské pleso              | Discontinuous |
|                | Tlstá hora                 | Continuous    |
| Czech Republic | Královec                   | Not recorded  |
|                | Machová                    | Discontinuous |
|                | Olbramovice                | Not recorded  |
|                | Vracov                     | Continuous    |
|                | Palasiny                   | Not recorded  |
|                | Kozli                      | Not recorded  |
|                | Rezabinec                  | Discontinuous |
|                | Borkovicka blata           | Discontinuous |
|                | Branna                     | Discontinuous |
|                | Loucky                     | Discontinuous |
|                | Chrát                      | Not recorded  |
|                | Velka niva                 | Discontinuous |
|                | Malá niva                  | Not recorded  |
|                | Mrtv8 luh                  | Discontinuous |
|                | Stráženská slat            | Discontinuous |
|                | Komoranské jezero          | Not recorded  |
|                | Dolskym                    | Not recorded  |
|                | Na bahne                   | Not recorded  |
|                | Velky Ded                  | Continuous    |
|                | Velky Maj                  | Not recorded  |
|                | Pancavská louka            | Discontinuous |
|                | Pryskyrin8 dul             | Not recorded  |
|                | Tpské raseliniste Mire     | Continuous    |
|                | Tpské raseliniste Mire II  | Not recorded  |
|                | Tpské raseliniste Mire III | Not recorded  |
| Ukraina        | Dovjok Swamp               | Not recorded  |
|                | Maly Podleski              | Not recorded  |
|                | Pecheniya                  | Not recorded  |
|                | Yukharina Balka            | Continuous    |
| Croatia        | Bokanjacko                 | Not recorded  |
|                | Mljet                      | Continuous    |
| Poland         | Bledowo Lake               | Discontinuous |
|                | Giecz                      | Not recorded  |
|                | Lake Gosciaz               | Discontinuous |
|                | Lake Skrzetuszewskie       | Discontinuous |
|                | Swietokrzyskie Lake        | Discontinuous |

|             |                                       |                |
|-------------|---------------------------------------|----------------|
|             | Cergowa Gora                          | Not recorded   |
|             | Godziszewskie Lake                    | Not recorded   |
|             | Lake Mikolajki                        | Not recorded   |
|             | Puscizna Rekowianska                  | Not recorded   |
| Austria     | Buntes Moor                           | Continuous     |
|             | Dortmunder Hütte                      | Not recorded   |
|             | Franz Senn-Hütte                      | Continuous     |
|             | Egelsee                               | Continuous     |
|             | Gerlos                                | In contraction |
|             | Giering                               | Discontinuous  |
|             | Gradenmoos                            | Continuous     |
|             | Grünau Moor                           | Discontinuous  |
|             | Lindenmoos                            | In expansion   |
|             | Mieminger See                         | Continuous     |
|             | Moor Alpenrose                        | Not recorded   |
|             | Rotmoos Obergurgl                     | Discontinuous  |
|             | Schwarzsee Reschenscheideck           | Discontinuous  |
|             | Schwemm                               | In contraction |
|             | Seefelder See                         | Discontinuous  |
|             | Zirbenwaldmoor                        | Discontinuous  |
|             | Wasenmoos beim Zellhof                | In expansion   |
|             | Grosses Überling Schattseit-Moor      | Discontinuous  |
|             | Dürrenecksee-Moor                     | Not recorded   |
|             | Fuchsschwanzmoos                      | Discontinuous  |
|             | Fuschlsee                             | Continuous     |
| Germany     | Ahlenmoor                             | Discontinuous  |
|             | Ahlequellmoor                         | Not recorded   |
|             | Bruchberg                             | Discontinuous  |
|             | Lüttersee                             | Not recorded   |
|             | Silberhohl                            | Discontinuous  |
|             | Sonnenberger Moor                     | Discontinuous  |
|             | Dunum (Hilliges Moor)                 | Discontinuous  |
|             | Felchosee                             | Discontinuous  |
|             | Großer Krebssee                       | Discontinuous  |
|             | Löddigsee                             | Discontinuous  |
|             | Wachel 3                              | Not recorded   |
|             | Brentenlohe                           | Not recorded   |
|             | Bruckmisse                            | Not recorded   |
|             | Glaswaldsee                           | Continuous     |
|             | Herrenwiesser see                     | Continuous     |
|             | Durchenbergried                       | Discontinuous  |
|             | Feuenried                             | Discontinuous  |
|             | Gaienhofen                            | Not recorded   |
|             | Hornstaad-Bodensee                    | Continuous     |
|             | Mindelsee                             | Continuous     |
|             | Oberderdingen-Großvillars             | Discontinuous  |
|             | Stierenmoos                           | Not recorded   |
|             | Wilder See beim Ruhestein             | Continuous     |
| Switzerland | Derrière les Embreux                  | Continuous     |
|             | Etang de la Gruère                    | Discontinuous  |
|             | Le Loclat                             | Continuous     |
|             | Lobsigensee                           | Continuous     |
|             | Montilier                             | Continuous     |
|             | Aegelsee                              | Not recorded   |
|             | Amsoldingersee                        | Discontinuous  |
|             | Bachalpsee                            | Continuous     |
|             | Hinterburgseeli                       | Continuous     |
|             | Hängstli                              | Not recorded   |
|             | Linden                                | In expansion   |
|             | Oberaar                               | Discontinuous  |
|             | Rotsee                                | Continuous     |
|             | Schwarzsee FR                         | In expansion   |
|             | Schöpfenwaldmoor                      | Discontinuous  |
|             | Sägistalsee                           | Continuous     |
|             | Stiftenegg                            | In expansion   |
|             | Trogenmoos                            | Discontinuous  |
|             | Aletschwald                           | Continuous     |
|             | Alp Lüsga Belalp 1                    | Discontinuous  |
|             | Alpi di Robièi Val Bavona             | Discontinuous  |
|             | Alpi di Robièi Val Bavona Bodenprofil | Not recorded   |
|             | Bitsch-Naters                         | Continuous     |
|             | Eggen ob Blatten                      | Continuous     |
|             | Etang d'y Cor Montana                 | Continuous     |
|             | Etang de Luissel Bex                  | Continuous     |
|             | Gondo Alpjen                          | Continuous     |
|             | Grächen See                           | In contraction |



|        |                                      |                |
|--------|--------------------------------------|----------------|
|        | Hopschensee                          | Continuous     |
|        | Mittlere Hellelen                    | Continuous     |
|        | Pillon Gsteig-Diablerets             | Continuous     |
|        | Wallbach Lenk                        | Continuous     |
|        | Gamperfin                            | Discontinuous  |
|        | Creux de Croue                       | Discontinuous  |
|        | Praz Rodet                           | Discontinuous  |
| Italy  | Dura-Moor                            | Continuous     |
|        | Malschötscher Hotter                 | Continuous     |
|        | Rinderplatz                          | Continuous     |
|        | Schwarzsee                           | Continuous     |
|        | Sommersüss                           | Continuous     |
|        | Lac de Lod                           | Continuous     |
|        | Lac de Villa                         | Continuous     |
|        | Lac du Verney-Dessus                 | Not recorded   |
|        | Torveraz                             | Not recorded   |
|        | Tourbière de Pilaz                   | Continuous     |
|        | Tourbière de Santa Anna              | Discontinuous  |
|        | Laghi dell'Orgials                   | Not recorded   |
|        | Lago Piccolo di Avigliana            | Continuous     |
|        | Ortasee                              | Discontinuous  |
|        | Ortasee II                           | Continuous     |
|        | Selle di Carnino                     | In expansion   |
|        | Lago della Costa                     | Continuous     |
|        | Lago Padule                          | Not recorded   |
|        | Colfiorito                           | Continuous     |
|        | Ospitale                             | Not recorded   |
|        | Pavullo                              | Continuous     |
|        | Parma                                | Discontinuous  |
|        | Lago di Martignano                   | Discontinuous  |
|        | Lago di Vico                         | Continuous     |
|        | Lago Albano                          | Continuous     |
|        | Lago di Nemi                         | Continuous     |
|        | Central Adriatic Sea                 | Continuous     |
|        | Salerno Bay                          | Discontinuous  |
|        | Lago Grande di Monticchio LGM        | Continuous     |
|        | Bradano Valley                       | Discontinuous  |
| France | Aronde                               | Discontinuous  |
|        | Auneau                               | Discontinuous  |
|        | Baie de Seine estuary                | Continuous     |
|        | Change-Glatinier                     | In expansion   |
|        | Coulvain                             | Discontinuous  |
|        | Fougères                             | Discontinuous  |
|        | La Verderie                          | In expansion   |
|        | La Vie                               | Not recorded   |
|        | Lavaré                               | Discontinuous  |
|        | Le Fourneau                          | Discontinuous  |
|        | Lingreville                          | In expansion   |
|        | Malingue                             | Continuous     |
|        | Marais de Kerdual                    | Discontinuous  |
|        | Marais de Lisle                      | In expansion   |
|        | Marais de Marchesieux                | Not recorded   |
|        | Mobeche Forest                       | Discontinuous  |
|        | Moulin de Thévalles                  | In expansion   |
|        | Pezou                                | In expansion   |
|        | Rimarde                              | In contraction |
|        | Saint-Ursin                          | Discontinuous  |
|        | Serrent                              | Discontinuous  |
|        | Hières sur Amby                      | Not recorded   |
|        | Lac Cerin                            | Continuous     |
|        | Lac de Clairvaux                     | In expansion   |
|        | Lac de Malpas                        | In expansion   |
|        | Lake of Annecy                       | Continuous     |
|        | Loras                                | Continuous     |
|        | Lutinière                            | In expansion   |
|        | Moselotte                            | In expansion   |
|        | Tourbière de Narbief                 | In contraction |
|        | col du Petit Saint Bernard           | Continuous     |
|        | La Beuffarde                         | Continuous     |
|        | Le Grand Lemps                       | Continuous     |
|        | Tourbière de Censeau                 | In expansion   |
|        | Tourbière du Mou de Pleure (Francia) | In expansion   |
|        | Tourbières des Granges des Chavants  | In expansion   |
|        | Champ Gazou                          | In expansion   |
|        | Etang Bouquin                        | In expansion   |
|        | Etang de la Villetelle               | Continuous     |

|                             |                |
|-----------------------------|----------------|
| Lac du Bouchet              | Continuous     |
| Lac du Mont de Belier       | Not recorded   |
| Le Grand Montarnu           | Continuous     |
| Le Jolan                    | Continuous     |
| Le Miroir                   | Discontinuous  |
| Les Cars                    | Discontinuous  |
| Les Chaux de Coudert        | Continuous     |
| Les Nans                    | Continuous     |
| Marais de Maurepas          | In expansion   |
| Mars                        | In expansion   |
| Montbé                      | In expansion   |
| Moulin de Prugnolas         | Discontinuous  |
| Nataloup                    | Discontinuous  |
| Peyre peat-bog              | Continuous     |
| Port des Lamberts           | Continuous     |
| Quart du Bois               | Discontinuous  |
| Sources de l'Yonne          | In expansion   |
| Tourbière de Longeyroux     | Not recorded   |
| Tourbière de Roussy         | Continuous     |
| Tourbière des Dauges        | Continuous     |
| La Baforière                | Continuous     |
| Tourbière de Chabannes      | Continuous     |
| Font Carluze                | Discontinuous  |
| Ancenis                     | Not recorded   |
| Basse-Ville                 | In expansion   |
| Bois-Jésus                  | Discontinuous  |
| Carquefou                   | Discontinuous  |
| Caves d'Amont               | In expansion   |
| Changeon                    | Continuous     |
| Cinq-Mars-la-Pile           | Continuous     |
| Corniche de Pail            | Continuous     |
| Jaunay                      | Discontinuous  |
| La Grange                   | Not recorded   |
| La Prairie du Cassoir       | In expansion   |
| La boire Torse              | Continuous     |
| Le Gesvres                  | In expansion   |
| Le Marais de la Perge       | Discontinuous  |
| Les Naudières               | Discontinuous  |
| Logne                       | Discontinuous  |
| Marais de Champtocé         | In expansion   |
| Marais de Mazerolles        | In expansion   |
| Marais de Munet             | In expansion   |
| Marais de Méron             | In expansion   |
| Marais de la Poupinière     | Discontinuous  |
| Marais des Bourbes          | Not recorded   |
| Oudon                       | Continuous     |
| Pas du Gu                   | Discontinuous  |
| Riabelais                   | Not recorded   |
| Saint Viaud Contin          | Discontinuous  |
| Tourbière de Nay            | In expansion   |
| Vertonne                    | Continuous     |
| Correo                      | Discontinuous  |
| Etang d'Ouveillan           | Discontinuous  |
| Fangeas                     | Continuous     |
| Grand Ratz le Pellet        | Continuous     |
| Lac de Praver               | Continuous     |
| Lac des Boites              | Continuous     |
| Lake Racou                  | Continuous     |
| Marais de Charauze          | In expansion   |
| Pelléautier                 | In expansion   |
| Pré Rond                    | Discontinuous  |
| Sabbion                     | Discontinuous  |
| Saint Julien de Ratz        | Continuous     |
| Saint Sixte                 | Continuous     |
| Tourbière de Gatimort       | In expansion   |
| Tourbière de Mont Sec       | In expansion   |
| Tourbière de Raux           | Continuous     |
| Tourbière de la Lande       | In expansion   |
| Tourbière des Narses Mortes | Discontinuous  |
| Tourbière du Peschio        | In expansion   |
| Albufera Alcludia           | Discontinuous  |
| Cala Galdana                | Not recorded   |
| Delta del Rio Besos         | Discontinuous  |
| Laguna Salada Chiprana      | In contraction |
| Atxuri                      | Discontinuous  |
| Cueto de la Avellanosa      | Continuous     |

Spain

|               |                        |                |
|---------------|------------------------|----------------|
|               | Laguna de la Roya      | In expansion   |
|               | PRD-4                  | Not recorded   |
|               | Posidonia Lligat       | Discontinuous  |
|               | Puerto de Los Tornos   | In expansion   |
|               | Saldropo               | In expansion   |
|               | Sanabria Marsh         | Not recorded   |
|               | El Payo                | Not recorded   |
|               | Lanzahíta              | Continuous     |
|               | Patateros bog          | Not recorded   |
|               | Peña Negra             | Continuous     |
|               | Puerto de Serranillos  | Not recorded   |
|               | Quintanar de la Sierra | Discontinuous  |
|               | Salada Pequeña         | Not recorded   |
| Portugal      | Charco da Candieira    | Discontinuous  |
|               | Lagoa Comprida 2       | Discontinuous  |
|               | Lagoa Travessa I       | Not recorded   |
| Syria         | Bouara                 | Not recorded   |
|               | Ghab                   | Not recorded   |
| Israel        | Dead Sea-Ze'elim       | Discontinuous  |
|               | Birkat Ram             | Continuous     |
|               | Lake Kinneret          | Discontinuous  |
|               | Hula Valley            | Not recorded   |
| Iran          | Gomishan               | Not recorded   |
|               | Lake Almalou           | Continuous     |
|               | Maharlou Lake          | Continuous     |
| Georgia       | Adange                 | Discontinuous  |
|               | Amtkel                 | Discontinuous  |
|               | Gagra                  | Not recorded   |
|               | Khodzal                | Not recorded   |
|               | Lagodekhi              | Not recorded   |
|               | Sibista                | Discontinuous  |
|               | Supsa River            | Discontinuous  |
|               | Lake Bazaleti          | Continuous     |
|               | Imera lake             | Continuous     |
| Albania       | Lake Maliq             | Discontinuous  |
| 0.5 – 0 Ka BP |                        |                |
| Turkey        | Lake Manyas            | Continuous     |
|               | Marmara Sea            | Continuous     |
|               | Beysehir Gölü I        | Discontinuous  |
|               | Göhlisar Gölü II       | Discontinuous  |
|               | Hoyran Gölü            | Discontinuous  |
|               | Kararmik Batakligi     | Discontinuous  |
|               | Köycegiz Gölü          | Discontinuous  |
|               | Sögüt Gölü             | Discontinuous  |
|               | Sagalassos-Gravgaz     | Discontinuous  |
|               | Lake Van               | Continuous     |
| Greece        | Kournas                | Continuous     |
|               | Asi Gonia II           | Discontinuous  |
|               | Asi Gonia I            | Discontinuous  |
|               | Paiko                  | Continuous     |
|               | Lailias                | In contraction |
|               | Elatia-Rhodopes        | Continuous     |
|               | Orestias               | Continuous     |
|               | Khimaditis III         | Continuous     |
|               | Vegoritis              | Continuous     |
|               | Edessa                 | Continuous     |
|               | Beles Greece)          | Continuous     |
|               | Litochoro              | Continuous     |
|               | Lerna                  | In contraction |
|               | Trikhonis              | Continuous     |
|               | Xinias                 | Continuous     |
|               | Voukaria               | In contraction |
|               | Pertouli               | Continuous     |
|               | Myrtoon Basin          | Continuous     |
| Bulgary       | Beliya Kanton          | Continuous     |
|               | Kupena II              | Not recorded   |
|               | Ribno I                | Continuous     |
|               | Mutorog                | Continuous     |
|               | Trilistnika            | Continuous     |
|               | Suho Ezero             | Continuous     |
|               | Sozopol                | Continuous     |
|               | Black Sea South        | Not recorded   |
|               | Black Sea Southwest    | Discontinuous  |
|               | Duranunlak II          | Not recorded   |
|               | Srebarna               | Continuous     |
|               | Mire Garvan            | Continuous     |

|                |                                  |                |
|----------------|----------------------------------|----------------|
|                | Osogovo                          | Continuous     |
|                | Begbunar                         | Continuous     |
|                | Sredna Gora                      | In expansion   |
|                | Straldzha mire                   | Not recorded   |
|                | Vitosha                          | Continuous     |
| Romania        | Avrig I                          | Discontinuous  |
|                | Avrig II                         | Discontinuous  |
|                | Mohos                            | In expansion   |
|                | Luci                             | Discontinuous  |
|                | Bisoca                           | In expansion   |
|                | Calinease                        | Continuous     |
|                | Semenic                          | Discontinuous  |
|                | Stereoiu                         | Discontinuous  |
| Hungary        | Alsópáhok                        | Continuous     |
|                | Balaton Centre                   | Continuous     |
|                | Balaton Northeast                | Continuous     |
|                | Balaton Southwest                | Continuous     |
|                | Nagy-Mohos                       | Not recorded   |
| Slovakia       | Bobrov                           | Discontinuous  |
|                | Zlatnicka Dolina                 | Discontinuous  |
|                | Strbské pleso                    | Discontinuous  |
|                | Tlstá hora                       | Continuous     |
| Czech Republic | Královec                         | In expansion   |
|                | Machová                          | In expansion   |
|                | Palasiny                         | Discontinuous  |
|                | Kozli                            | Not recorded   |
|                | Rezabinec                        | Not recorded   |
|                | Borkovicka blata                 | In expansion   |
|                | Branna                           | Not recorded   |
|                | Loucky                           | Discontinuous  |
|                | Chrát                            | Not recorded   |
|                | Velka niva                       | Not recorded   |
|                | Malá niva                        | Discontinuous  |
|                | Mrtv8 luh                        | Discontinuous  |
|                | Stráženská slat                  | Not recorded   |
|                | Komoranské jezero                | Discontinuous  |
|                | Dolskym                          | Discontinuous  |
|                | Na bahne                         | Discontinuous  |
|                | Velky Maj                        | Discontinuous  |
|                | Pancavská louka                  | Discontinuous  |
|                | Pryskyrin8 dul                   | Not recorded   |
|                | Tpské raseliniste Mire           | In contraction |
|                | Tpské raseliniste Mire II        | Not recorded   |
|                | Tpské raseliniste Mire III       | In expansion   |
| Ukraina        | Dovjok Swamp                     | Discontinuous  |
|                | Maly Podleski                    | Not recorded   |
|                | Pecheniya                        | Not recorded   |
|                | Yukharina Balka                  | Continuous     |
| Croatia        | Mljet                            | Continuous     |
| Poland         | Bledowo Lake                     | Discontinuous  |
|                | Giecz                            | Not recorded   |
|                | Lake Gosciuz                     | Discontinuous  |
|                | Swietokrzyskie Lake              | In expansion   |
|                | Cergowa Gora                     | Discontinuous  |
|                | Godziszewskie Lake               | Discontinuous  |
|                | Lake Mikolajki                   | Discontinuous  |
|                | Puscizna Rekowianska             | Continuous     |
| Austria        | Buntes Moor                      | Continuous     |
|                | Dortmunder Hütte                 | Discontinuous  |
|                | Franz Senn-Hütte                 | Continuous     |
|                | Egelsee                          | Continuous     |
|                | Gerlos                           | Discontinuous  |
|                | Giering                          | Discontinuous  |
|                | Gradenmoos                       | Continuous     |
|                | Grünau Moor                      | Discontinuous  |
|                | Mieminger See                    | In contraction |
|                | Moor Alpenrose                   | Discontinuous  |
|                | Rotmoos Obergurgl                | In expansion   |
|                | Schwarzsee Reschenscheideck      | Discontinuous  |
|                | Schwemm                          | Discontinuous  |
|                | Seefeldler See                   | Discontinuous  |
|                | Zirbenwaldmoor                   | In expansion   |
|                | Wasenmoos beim Zellhof           | In contraction |
|                | Grosses Überling Schattseit-Moor | Not recorded   |
|                | Dürrenecksee-Moor                | Not recorded   |
|                | Fuchsschwanzmoos                 | Not recorded   |

|                      |                                       |                |
|----------------------|---------------------------------------|----------------|
| Germany              | Fuschlsee                             | Continuous     |
|                      | Ahlequellmoor                         | Discontinuous  |
|                      | Bruchberg                             | Discontinuous  |
|                      | Lüttersee                             | In expansion   |
|                      | Silberhohl                            | Discontinuous  |
|                      | Sonnenberger Moor                     | Discontinuous  |
|                      | Dunum (Hilliges Moor)                 | Discontinuous  |
|                      | Großer Krebssee                       | Discontinuous  |
|                      | Löddigsee                             | Discontinuous  |
|                      | Wachel 3                              | Continuous     |
|                      | Brentenlohe                           | In expansion   |
|                      | Glaswaldsee                           | Continuous     |
|                      | Herrenwiesser see                     | Continuous     |
|                      | Durchenbergried                       | Discontinuous  |
|                      | Feuenried                             | In expansion   |
|                      | Gaienhofen                            | Discontinuous  |
|                      | Hornstaad-Bodensee                    | Continuous     |
|                      | Mindelsee                             | Continuous     |
|                      | Oberderdingen-Großvillars             | Not recorded   |
|                      | Steenmoos                             | Not recorded   |
| Switzerland          | Derrière les Embreux                  | Continuous     |
|                      | Le Loclat                             | Continuous     |
|                      | Aegelsee                              | Discontinuous  |
|                      | Bachalpsee                            | Continuous     |
|                      | Hinterburgseeli                       | Continuous     |
|                      | Hängstli                              | Not recorded   |
|                      | Oberaar                               | Discontinuous  |
|                      | Rotsee                                | Continuous     |
|                      | Schwarzsee FR                         | Continuous     |
|                      | Schöpfenwaldmoor                      | In expansion   |
|                      | Sägistalsee                           | Continuous     |
|                      | Süftenenegg                           | In expansion   |
|                      | Trogenmoos                            | In expansion   |
|                      | Aletschwald                           | Continuous     |
|                      | Alp Lüsga Belalp 1                    | Discontinuous  |
|                      | Alpi di Robièi Val Bavona             | In expansion   |
|                      | Alpi di Robièi Val Bavona Bodenprofil | Discontinuous  |
|                      | Bitsch-Naters                         | Continuous     |
|                      | Eggen ob Blatten                      | Continuous     |
|                      | Etang d'y Cor Montana                 | Continuous     |
|                      | Etang de Luissel Bex                  | Continuous     |
|                      | Gondo Alpjen                          | Continuous     |
|                      | Grächen See                           | Discontinuous  |
|                      | Hopschensee                           | Continuous     |
|                      | Mittlere Hellelen                     | Continuous     |
|                      | Wallbach Lenk                         | Continuous     |
|                      | Gamperfin                             | Discontinuous  |
|                      | Praz Rodet                            | In expansion   |
|                      | Dura-Moor (Italy)                     | Continuous     |
|                      | Malschötscher Hotter (Italy)          | Continuous     |
|                      | Rinderplatz (Italy)                   | Continuous     |
|                      | Schwarzsee (Italy)                    | Continuous     |
|                      | Sommersüss (Italy)                    | Continuous     |
| Lac de Lod (Italy)   | Continuous                            |                |
| Lac de Villa (Italy) | Continuous                            |                |
| Italy                | Lac du Verney-Dessus                  | Discontinuous  |
|                      | Torveraz                              | Not recorded   |
|                      | Tourbière de Pilaz                    | Continuous     |
|                      | Tourbière de Santa Anna               | Discontinuous  |
|                      | Laghi dell'Orgials                    | Discontinuous  |
|                      | Lago Grande di Avigliana              | Continuous     |
|                      | Lago Piccolo di Avigliana             | Continuous     |
|                      | Ortasee II                            | Continuous     |
|                      | Selle di Carnino                      | Continuous     |
|                      | Lago della Costa                      | Continuous     |
|                      | Lago Padule                           | Discontinuous  |
|                      | Colfiorito                            | In contraction |
|                      | Ospitale                              | Not recorded   |
|                      | Pavullo                               | Continuous     |
|                      | Parma                                 | Discontinuous  |
|                      | Lago di Martignano                    | Not recorded   |
|                      | Lago di Vico                          | Continuous     |
|                      | Lago Albano                           | Continuous     |
|                      | Lago di Nemi                          | Continuous     |
|                      | Central Adriatic Sea                  | Continuous     |
| Salerno Bay          | Discontinuous                         |                |

|        |                                      |                |
|--------|--------------------------------------|----------------|
|        | Lago Grande di Monticchio LGM        | Continuous     |
| France | Aronde                               | Discontinuous  |
|        | Change-Glatinier                     | In contraction |
|        | Coulvain                             | Discontinuous  |
|        | Fougères                             | Discontinuous  |
|        | La Verderie                          | Continuous     |
|        | Lavaré                               | Discontinuous  |
|        | Le Fourneau                          | Not recorded   |
|        | Malingue                             | Continuous     |
|        | Marais de Kerdual                    | Not recorded   |
|        | Marais de Lisle                      | Continuous     |
|        | Marais de Marchesieux                | Not recorded   |
|        | Mobeche Forest                       | Not recorded   |
|        | Moulin de Thévalles                  | Continuous     |
|        | Pezou                                | In contraction |
|        | Saint-Ursin                          | Not recorded   |
|        | Serrent                              | Discontinuous  |
|        | Hières sur Amby                      | Not recorded   |
|        | Lac de Clairvaux                     | Continuous     |
|        | Lac de Malpas                        | In contraction |
|        | Lake of Annecy                       | Continuous     |
|        | Loras                                | Continuous     |
|        | Moselotte                            | In contraction |
|        | Tourbière de Narbief                 | Not recorded   |
|        | col du Petit Saint Bernard           | In contraction |
|        | La Beuffarde                         | In contraction |
|        | Le Grand Lemps                       | Continuous     |
|        | Tourbière de Censeau                 | In contraction |
|        | Tourbière du Mou de Pleure (Francia) | In contraction |
|        | Tourbières des Granges des Chavants  | Continuous     |
|        | Champ Gazon                          | Continuous     |
|        | Etang Bouquin                        | Continuous     |
|        | Etang de la Villetelle               | Continuous     |
|        | Lac du Bouchet                       | Continuous     |
|        | Lac du Mont de Belier                | Discontinuous  |
|        | Le Grand Montarnu                    | Continuous     |
|        | Les Cars                             | Discontinuous  |
|        | Les Chaux de Coudert                 | Continuous     |
|        | Les Nans                             | Continuous     |
|        | Marais de Maurepas                   | Continuous     |
|        | Mars                                 | Continuous     |
|        | Montbé                               | In contraction |
|        | Moulin de Prugnolas                  | Discontinuous  |
|        | Nataloup                             | In expansion   |
|        | Peyre peat-bog                       | In contraction |
|        | Port des Lamberts                    | Continuous     |
|        | Quart du Bois                        | In expansion   |
|        | Sources de l'Yonne                   | In contraction |
|        | Tourbière de Longeyroux              | Not recorded   |
|        | Tourbière de Roussy                  | Continuous     |
|        | Tourbière des Dauges                 | In contraction |
|        | La Bafortière                        | Continuous     |
|        | Tourbière de Chabannes               | In contraction |
|        | Font Carluze                         | Discontinuous  |
|        | Basse-Ville                          | Continuous     |
|        | Bois-Jésus                           | Not recorded   |
|        | Carquefou                            | In expansion   |
|        | Caves d'Amont                        | Discontinuous  |
|        | Changeon                             | Continuous     |
|        | Cinq-Mars-la-Pile                    | In contraction |
|        | Jaunay                               | In expansion   |
|        | La boire Torse                       | Continuous     |
|        | Le Gesvres                           | Continuous     |
|        | Le Marais de la Perge                | Discontinuous  |
|        | Les Naudières                        | Discontinuous  |
|        | Logne                                | Discontinuous  |
|        | Marais de Champtocé                  | Continuous     |
|        | Marais de Mazerolles                 | Continuous     |
|        | Marais de Munet                      | Continuous     |
|        | Marais de Méron                      | Continuous     |
|        | Marais de la Poupinière              | Discontinuous  |
|        | Marais des Bourbes                   | In expansion   |
|        | Oudon                                | In contraction |
|        | Pas du Gu                            | Discontinuous  |
|        | Ribelais                             | Not recorded   |
|        | Saint Viaud Contin                   | Discontinuous  |

|          |                              |                |
|----------|------------------------------|----------------|
|          | Tourbière de Nay             | In contraction |
|          | Vertonne                     | Continuous     |
|          | Etang d'Ouveillan            | Not recorded   |
|          | Grand Ratz le Pellet         | Continuous     |
|          | Lac de Praver                | Continuous     |
|          | Lac des Boites               | Continuous     |
|          | Lake Racou                   | Continuous     |
|          | Marais de Charauze           | Continuous     |
|          | Pelléautier                  | Continuous     |
|          | Pré Rond                     | In expansion   |
|          | Saint Sixte                  | Continuous     |
|          | Tourbière de Gatimort        | Continuous     |
|          | Tourbière de Mont Sec        | Continuous     |
|          | Tourbière de Raux            | In contraction |
|          | Tourbière de la Lande        | Continuous     |
|          | Tourbière des Narses Mortes  | Discontinuous  |
|          | Tourbière du Peschio         | Continuous     |
| Spain    | Albufera Alcudia             | Discontinuous  |
|          | Cala Galdana                 | Not recorded   |
|          | Delta del Rio Besos          | Discontinuous  |
|          | Laguna Salada Chiprana       | Discontinuous  |
|          | Atxuri                       | Not recorded   |
|          | Cueto de la Avellanosa       | Continuous     |
|          | Laguna de la Roya            | Continuous     |
|          | PRD-4                        | Not recorded   |
|          | Posidonia Lligat             | Discontinuous  |
|          | Puerto de Los Tornos         | Continuous     |
|          | Sanabria Marsh               | Discontinuous  |
|          | El Payo                      | Not recorded   |
|          | Lanzahíta                    | Continuous     |
|          | Patateros bog                | Discontinuous  |
|          | Peña Negra                   | Continuous     |
|          | Puerto de Serranillos        | Discontinuous  |
|          | Quintanar de la Sierra       | Discontinuous  |
|          | Salada Pequeña               | Not recorded   |
|          | Turbera de La Panera Cabras  | Discontinuous  |
| Portugal | Charco da Candieira          | Discontinuous  |
|          | Lagoa Comprida 2             | Discontinuous  |
|          | Lagoa Travessa I             | Not recorded   |
| Syria    | Bouara                       | Discontinuous  |
|          | Birkat Ram (Israel)          | Continuous     |
|          | Lake Kinneret (Israel)       | Discontinuous  |
| Israel   | Carne Coastal Plain (Israel) | Not recorded   |
| Iran     | Gomishan                     | Not recorded   |
|          | Lake Almalou                 | Continuous     |
|          | Maharlou Lake                | Continuous     |
| Georgia  | Adange                       | Not recorded   |
|          | Amtkel                       | Discontinuous  |
|          | Khodzal                      | Discontinuous  |
|          | Lagodekhi                    | Discontinuous  |
|          | Sibista                      | Discontinuous  |
|          | Supsa River                  | Discontinuous  |
|          | Lake Bazaleti                | Continuous     |
|          | Imera lake                   | Continuous     |
| Albania  | Lake Maliq (Albania)         | Not recorded   |

<sup>a</sup> The fossil pollen data have been extracted from the existing European Pollen Database (EPD; <http://www.ncdc.noaa.gov/paleo/epd>) and from 38 pollen diagrams published in scientific journals until September 2016. We downloaded all suitable pollen data from 412 Eurasian sites (unrestricted EPD data) in order to detect the discontinuous and continuous occurrence of *Juglans*-type fossil pollen before (1700 -11.923 Ka BP) and during the Holocene in Europe and Western Asia. Restricted pollen spectra or pollen data without calibrated radiocarbon timescale were excluded from our study.

<sup>b</sup> Despite being produced in large quantities, *Juglans*-type fossil pollen is poorly dispersed. Pollen values above 2% indicate a relative high density of walnut trees near the sampling site [240]. Although possible contaminations due to re-deposition of Juglandaceae pollen from the Tertiary deposits have been detected in the recent sediments of Crimea (Ukraine) [241] and Western Caucasus [242], the long-distance transport of walnut pollen is considered rather unlikely. Therefore, we chose to map the occurrence of *Juglans*-type fossil pollen using the

following discrete classification. The presence/absence of *Juglans*-type fossil pollen into fifteen distinct time intervals before (early presence) and during the Holocene and the subsequent pollen classification were reported for each selected site: Continuous = pollen grains occurred regularly and abundantly (Red); Discontinuous = at least one single pollen grain or few pollen grains discontinuously distributed (Blue); In expansion = transition from discontinuous to continuous occurrence of pollen grains (Orange); In contraction = transition from continuous to discontinuous occurrence of pollen grains (Green); Not recorded = absence of pollen grains (Gray). Fifteen geo-referenced distribution maps were drawn with ArcGIS 9.3 software (ESRI, Redlands, Calif. USA) and assembled in S1 Video.

## References

1. Cordova CE, Harrison SP, Mudie PJ, Riehl S, Leroy SAG, Ortiz N. Pollen, plant macrofossil and charcoal records for palaeovegetation reconstruction in the Mediterranean-Black Sea Corridor since the Last Glacial Maximum. *Quatern Int.* 2009; 197: 12-26.
2. Bottema S. The Holocene history of walnut, sweet-chestnut, manna-ash and plane tree in the Eastern Mediterranean. *Pallas.* 2000; 52: 35-59.
3. Eastwood WJ, Roberts N, Lamb HF, Tibby JC. Holocene environmental change in southwest Turkey: a palaeoecological record of lake and catchment-related changes. *Quaternary Sci Rev.* 1999; 18: 671-695.
4. Van Zeist, W, Woldring H, Stapert D. Late quaternary vegetation and climate of southwestern Turkey. *Palaeohistoria.* 1975; 17: 53-144.
5. Vermoere M, Vanhecke L, Waelkens M, Smets E. Modern pollen studies in the territory of Sagalassos (Southwest Turkey) and their use in the interpretation of a Late Holocene pollen diagram. *Rev Palaeobot Palynol.* 2001; 114: 29-56.
6. Van Zeist W, Woldring H. A postglacial pollen diagram from Lake Van in east Anatolia. *Rev Palaeobot Palynol.* 1978; 26: 249-276.
7. Bottema S, Sarpaki A. Environmental change in Crete: a 9000-year record of Holocene vegetation history and the effect of the Santorini eruption. *Holocene.* 2003; 13: 733-749.



8. Atherden MA, Hall JA. Human impact on vegetation in the White Mountains of Crete since AD 500. *Holocene*. 1999; 9: 183-193.
9. Gerasimidis A, Athanasiadis N. Woodland history of northern Greece from the mid Holocene to recent time based on evidence from peat pollen profiles. *Veg Hist Archaeobot*. 1995; 4: 109-116.
10. Kouli K, Dermitzakis MD. Contributions to the European Pollen Database. 11. Lake Orestiás (Kastoria, northern Greece). *Grana*. 2010; 49: 154-156.
11. Bottema S. Palynological investigations in Greece with special reference to pollen as indicator of human activity. *Palaeohistoria*. 1982; 24: 257-289.
12. Athanasiadis N, Gerasimidis A, Panajiotidis S. A palynological study in the Beles Mountains, Northern Greece. "Aspects of Palynology and Palaeoecology" Festschrift in honour of Elissaveta Bozilova. PENSOFIT, Sofia-Moscow; 2003. pp. 185-197.
13. Athanasiadis N. Zur postglazialen Vegetationsentwicklung von Litochoro Katarinis und Pertouli Trikalon (Griechenland). *Flora*. 1975; 164: 99-132.
14. Turner J, Greig JRA. Some Holocene pollen diagrams from Greece. *Rev Palaeobot Palynol*. 1975; 20: 171-204.
15. Jahns S. On the Holocene history of the Argive plain (Peloponese, southern Greece). *Veg Hist Archaeobot*. 1993; 2: 187-203.
16. Bottema S. Pollen analytical investigations in Thessaly . *Palaeohistoria*. 1979; 21: 19-40.
17. Jahns S. The Holocene history of vegetation and settlement at the coastal site of Lake Voulkaria in Acarnania, western Greece. *Veg Hist Archaeobot*. 2005; 14: 55-66.
18. Lazarova MA, Tonkov S, Marinova E, Ivanov D, Bozilova EDB. Contributions to the European Pollen Database. 12. Western Rhodopes Mountains (Bulgaria): peat bog Beliya Kanton. *Grana*. 2011; 50: 162-164.

19. Huttunen A, Huttunen RL, Vasari Y, Panovska HIP, Bozilova EDB. Late Glacial and Holocene history of flora and vegetation in the Western Rhodopes Mountains Bulgaria. *Acta Bot Fennica*. 1992; 144: 63-80.
20. Tonkov S, Panovska H, Possnet G, Bozilova E. The Holocene vegetation history of Northern Pirin Mountain, southwestern Bulgaria: pollen analysis and radiocarbon dating of a core from Lake Ribno Banderishko. *Holocene*. 2002; 12: 201-210.
21. Stefanova I, Bozilova EDB. Studies on the Holocene history of vegetation in the Northern Pirin Mountains, southwestern Bulgaria. In: Bozilova E, Tonkov S, editors. *Advances in Holocene Palaeoecology in Bulgaria*. Sofia, Bulgaria: Pensoft Publications; 1995. pp. 9-31.
22. Panovska HIP, Bozilova EDB, Tonkov S. A palaeoecological investigation on the vegetation history in the Southern Pirin Mountains (southwestern Bulgaria). In: Bozilova E, Tonkov S, editors. *Advances in Holocene Palaeoecology in Bulgaria*. Sofia, Bulgaria: Pensoft Publications; 1995; pp 32-46.
23. Marinova E, Tonkov S, Bozilova E, Vajsor I. Holocene anthropogenic landscapes in the Balkans: the palaeobotanic evidence from southwestern Bulgaria. *Veget Hist Archaeobot*. 2012; 21: 413–427.
24. Tonkov S, Atanassova JR, Bozilova EDB, Skog G. A Late Holocene pollen diagram from Suho Ezero, Rila Monastery area (Central Rila Mountains, southwestern Bulgaria). *Phytol Balcan*. 1998; 4:31-38.
25. Marinova-Filipova M, Giosan L, Angelova H, Preisinger A, Pavlov D, Vergiev S. Palaeoecology of Submerged prehistoric settlements in Sozopol Harbour, Bulgaria. In: Benjamin J, Bonsall C, Pickard C, Fischer A, editors. *Submerged Prehistory*. Oxford, United Kingdom: Oxbow Books; 2011. pp. 230-244.
26. Bozilova EDB, Beug HJ. On the Holocene history of vegetation in SE Bulgaria (Lake Arkutino, Ropotamo region). *Veget Hist Archaeobot*. 1992; 1: 19-32.

27. Shopov VS, Bozilova EDB, Atanassova JR. Biostratigraphy and radiocarbon data of upper quaternary sediments from the western part of the Black Sea. *Geol Balc.* 1992; 22: 59-70.
28. Atanassova JR. Dinoflagellate cysts of Late Quaternary and recent sediments from the western Black sea. *Annual of Sofia University, Faculty of Biology.* 1995; 87: 17-28.
29. Bozilova EDB, Filipova MVFM. Paleocological environment in northeastern Black Sea area during Neolithic, Eneolithic and Bronze periods. *Stud Praehist.* 1986; 8: 160-165.
30. Bozilova EDB, Lazarova MA, Straszewska K.. Geomorphological characteristics and development of the vegetation in the region of Srebarna Lake Bulgaria (in Bulgarian). *Godishnik na Sofiiskiia Universitet "Kliment Okhridski" Biologicheski Fakultet.* 1985; 79: 99-109.
31. Lazarova MA. Human impact on the natural vegetation in the region of Lake Srebarna and mire Garvan (northeastern Bulgaria). Palynological and Palaeoethnobotanical evidence. In: Bozilova EDB, Tonkov S, editors. *Advances in Holocene Palaeoecology in Bulgaria.* Sofia-Moscow: Pensoft Publication; 1995. pp. 47-67.
32. Tonkov S, Bozilova EDB. Pollen analysis of peat bog in Maleshevska mountain (SW Bulgaria). *Annual of Sofia University, Faculty of Biology* 1992; 81: 11-21.
33. Lazarova MA, Tonkov S, Snowball I, Marinova E. Contributions to the European Pollen Database. 6. Peat-bog Begubar (Osogovo Mountains, south-west Bulgaria): Four millennia of vegetation history. *Grana.* 2009; 48: 147-149.
34. Petrov SI, Filipovitch L. Postglacial changes of the vegetation on the slopes of Sredna Gora mountain. *Proceedings Nat. Conf. of Botany (Bulgaria).* 1987; 1: 339-406.
35. Tonkov S, Bozilova EDB, Marinova E, Jungner H. History of vegetation and landscape during the last 4000 years in the area of Straldzha mire (southeastern Bulgaria). *Phytol Balcan.* 2008; 14: 185-191.

36. Bozilova EDB, Tonkov S. Vegetational development in the mountainous areas of SW Bulgaria. I. Palynological investigation and reconstruction of past vegetation. *Ecol Mediterr.* 1985; 9: 33-37.
37. Filipovitch L. Palynological studies of peat bogs on the southern slopes of Vitosha mountain. *For Sci.* 1985; 2: 3-16.
38. Tantau I, Reille M, de Beaulieu JL, Farcas S. Late Glacial and Holocene vegetation history in the southern part of Transylvania : pollen analysis of two sequences from Avrig. *J Quat Sci.* 2006; 21: 49-61.
39. Tantau I, Reille M, de Beaulieu JL, Farcas S, Goslar T, Paterne M. Vegetation history in the Eastern Romanian Carpathians: pollen analysis of the two sequences from the Mohos crater. *Veg Hist Archaeobot.* 20013; 12:113-125.
40. Tantau I, Feurdean A, De Beaulieu JL, Reille M, Farcas S. Vegetation sensitivity to climate changes and human impact in the Harghita Mountains (Eastern Romanian Carpathians) over the past 15000 years. *J. Quat Sci.* 2014; 29: 141-152.
41. Tantau I, Reille M, de Beaulieu JL, Farcas S, Brewer S. Holocene vegetation history in Romanian Subcarpathians. *Quat Res.* 2009; 72: 164-173.
42. Feurdean AN, Willis KJ, Astalos C. Legacy of the past land-use changes and management on the 'natural' upland forest composition in the Apuseni Natural Park, Romania. *Holocene.* 2009; 19: 967-981.
43. Rösch M., Fischer E. A radiocarbon dated Holocene pollen profile from the Banat mountains (Southwestern Carpathians, Romania). *Flora.* 2000; 195: 277-286.
44. Björkman, L., A. Feurdean, and B. Wohlfarth. Late- Glacial and Holocene forest dynamics at Steregoiu in the Gutaiului Mountains, Northwest Romania. *Rev Palaeobot Palynol.* 2003; 124: 79-111.

45. Zatykó CS, Juhász I, Sümegei P. Environmental archaeology in Transdanubia. Budapest: Archaeological Institute of the Hungarian Academy of Sciences. VAH. 2007; 1: 20: 391.
46. Juhász I. Reconstitution palynologique de la végétation depuis le Tardiglaciaire dans la région de Zala, sud-est de la Hongrie. [Palynological Reconstruction of the Lateglacial and Holocene Vegetation in South-west Hungary]. PhD Dissertation in Biosciences of Environment (Palynology), University of Aix-Marseille III (Marseille, France) and University of Pécs (Pécs, Hungary); 2002.
47. Juhász I, Drescher-Schneider RE, Andrieu-Ponel V, de Beaulieu JL. Anthropogenic indicators in a palynological record from Pölöske, Zala Region, Western Hungary. *Universitätsforschungen zur Prähistorischen Archäologie Bonn*. 2001; 78: 29-38.
48. Rybníček K, Rybníčková E. A palaeological reconstruction of precultural vegetation in the intermontane basins of the western Carpathians. *Ecol. Medit*. 1985; 11: 27-31.
49. Rybníčková E, Rybníček K. Pollen and macroscopic analyses of sediments from two lakes in the High Tatra mountains, Slovakia. *Veg Hist Archaeobot*. 2003; 15: 345-356.
50. Rybníček K, Rybníčková E. Upper Holocene dry land vegetation in the Moravian-Slovakian borderland (Czech and Slovak Republics). *Veg Hist Archaeobot*. 2008; 17: 701-711.
51. Dolakova N, Roszkova A, Prichystal A. Palynology and natural environment in the Pannonian to Holocene sediments of the Early Medieval centre Pohansko near Breclav . *J Archaeol Sci*. 2010; 37: 2538-2550.
52. Svobodová H. The development of the southern Moravian vegetation in the Late Glacial and Holocene [in Czech]. Master Thesis, Institute of Botany Pruhonice, Czech Republic. 1992.
53. Jankovská V. The evolution of Late-Glacial and Holocene vegetation in the vicinity of Svetla nad Sazavou (in the western Forland of the Bohemian-Moravian uplands). *Folia Geobot Phytotaxon*. 1989; 24: 337-448.

54. Rybníček K, Rybníčková E. The history of flora and vegetation on the Blato mire in southeast Bohemia (palaeoecological study). *Folia Geobot Phytotaxon*. 1968; 3: 117-142.
55. Pokorný P, Kunes P. Contributions to the European Pollen Database. 5. Kozlí (S. Bohemia, Czech Republic). *Grana*, 2009; 48: 77-78.
56. Rybníčková E, Rybníček K. Palaeogeobotanical evaluation of the Holocene profile from the Rezabinec fishpond. *Folia Geobot Phytotaxon*. 1985; 20: 419-437.
57. Jankovská V. Paläogeobotanische Rekonstruktion der Vegetationsentwicklung im Becken Trebonská pánev während des Spätglazials und Holozäns. *Vegetace CSSR A11*, Academia, Praha. 1980.
58. Rybníček K. Die vegetationsverhältnisse der moore im südlichen Teil der böhmisch-Mährischen Hohe. *Vegetace CSSR*, Praha, 1974; A 6: 1-236.
59. Brízová E. Late Glacial and Holocene development of the vegetation in the Labe (Elbe) River flood-plain (Central Bohemia, Czech Republic). *Acta Palaeobot*. 1999; 2(Suppl.): 549-554.
60. Svobodová H, Soukupová L, Reille M. Diversified development of mountain mires, Bohemian Forest, Central Europe, in the last 13,000 years. *Quat Int*. 2002; 91: 123-135.
61. Svobodová H, Reille M, Goeury C., Past vegetation dynamics of Vltavský luh, upper Vltava river valley in the Sumava mountains, Czech Republic. *Veg Hist Archaeobot*. 2001; 10: 185-199.
62. Jankovská V. Palynologische Erforschung archäologischer Proben aus dem Komoranské jezero-See bei Most (NW-Böhmen). *Folia Geobot Phytotaxon*. 1988; 23: 45-78.
63. Abraham V. Přírodní vegetace a její změny v důsledku kolonizace a lesnického hospodářství v Českém Švýcarsku (The natural vegetation of Bohemian Switzerland and its changes as an impact of habitation and forest management). M.Sc. Thesis, Charles University, Praha. 2006.

64. Pokorný P, van der Knaap WO. Contributions to the European Pollen Database. 10. Na Bahne : Vegetation development over the last 2.5 millenia in the Eastern Bohemian lowland. Grana. 2010; 49: 79-81.
65. Speranza A. Solar and anthropogenic forcing of late- Holocene vegetation changes in the Czech Giant Mountains. PhD Thesis, University of Amsterdam, Amsterdam; 2000.
66. Kunes P, Pokorný P, Jankovská V. Post-glacial vegetation development in sandstone areas of Czech Republic. In: Härtel H, Cílek V, Herben T, Jackson A, Williams R, editors. Sandstone Landscapes. Praha: Academia; 2007. pp. 224-257.
67. Kremenetski CV. Holocene vegetation and climate history of southwestern Ukraine. Rev Palaeobot Palynol. 1995; 85: 289-301.
68. Artushenko AT, Ya. Arap R, Bezusko LG. History of vegetation of western areas of Ukraine in Quaternary period. Naukova dumka, Kiev, Ukraine; 1982.
69. Cordova CE, Lehman PH. Archaeopalynology of synanthropic vegetation in the chora of Chersonesos, Crimea, Ukraine. J Archaeol Sci. 2003; 30: 1483-1501.
70. Grüger E. The Changing Face of Dalmatia. In: Chapman J, Shiel R, Batovic S, editors. Archaeological and Ecological Studies in a Mediterranean Landscape. Vegetation change. Leicester: Leicester University Press; 1996. pp. 33-44.
71. Jahns S, van der Bogaard C. New palynological and tephrostratigraphical investigations of two salt lagoons on the island of Mljet, south Dalmatia, Croatia. Veget Hist Archaeobot 1998; 7: 219-234.
72. Binka K, Ciesla A, Lacka B, Madeyska T, Marciniak B, Szeroczynska K, The development of Bledowo Lake (central Poland). A palaeoecological study. In: Madeyska T, editor. Pleistocene of Poland. Part 17, Studia Geologica Polonica 100; 1991. pp. 3-85.

73. Szczepanek K. Anthropogenic vegetation changes in the region of the Dukla Pass, the Lower Beskid Mountains. *Polska Akademia Umiejetnosci. Prace Komisji Prehistorii Karpat.* 2001; 2: 171-182.
74. Milecka K. Pollen analysis of lake sediments in Giecz - The state of the investigation. In: Tobolski K, editor. *Wstep do paleoecologii lednideiego parku Krajobvazowego*; 1991. pp. 147-150.
75. Tobolski, K. (Polish). In: Tobolski K, editor. *Wstep do paleoecologii lednideiego parku Krajobvazowego*; 1991. pp. 11-34.
76. Makohonienko M. *Przyrodnicza historia Gniezna. Prace Zakladu Biogeografii i paleoekologii. UAM. Homini. Poznan-Gniezno.* 2000; 1: 1-121.
77. Miotk G. *Badania palinologiczne osadow z polnocnego obrzeza jeziora Godziszewskiego kolo Tczewa/woj. gdanskie Fizjograficzne na Polska Zach. T.XXXVI, Seria A, Geogr.Fiz.:* 1986; 1: 123-135.
78. Ralska-Jasiewiczowa M. Type Region P-x: Masurian Great Lakes District. *Acta Palaeobot.* 1989; 29: 95-100.
79. Obidowicz A. Type Region P-a: Inner West Carpathians- Nowy Targ Basin. *Acta Palaeobot.* 1989; 29: 11-15.
80. Weirich J, Bortenschlager S. *Beiträge zur Vegetationsgeschichte Tirols III: Stubaier Alpen - Zillertaler Alpen. Ber. nat.-med. Verein Innsbruck.* 1980; 67: 7-30.
81. Hüttemann H, Bortenschlager S. *Beiträge zur Vegetationsgeschichte Tirols VI: Riesengebirge, Hohe Tatra - Zillertal, Kühtai. Ber. nat.-med. Verein Innsbruck.* 1987; 74: 81-112.
82. Wahlmüller N. *Beiträge zur Vegetationsgeschichte Tirols V: Nordtiroler Kalkalpen. Ber. nat.-med. Verein Innsbruck* 1985; 72: 101-144.



83. Bortenschlager S. Beiträge zur Vegetationsgeschichte Tirols I. Inneres Ötztal und unteres Inntal. Ber. nat.-med. Verein Innsbruck 1984; 71: 19-56.
84. van der Knaap WO, Ammann B. Depth-age relationships of 25 well-dated Swiss Holocene pollen sequences archived in the Alpine Palynological Data-Base. *Revue de Paléobiologie* 1997; 16: 433-480.
85. Bortenschlager I. Beiträge zur Vegetationsgeschichte Tirols II: Kufstein - Kitzbühel - Pass Thurn. Ber. nat.-med. Verein Innsbruck. 1976; 63: 105-137.
86. Krisai R, Mayer W, Schröck C, Türk R. Das Gradenmoos in der Schobergruppe (NP Hohe Tauern, Kärnten) Vegetation und Entstehung. *Carinthia II*. 2006; 196/116: 359-386.
87. Oeggel K. Beiträge zur Vegetationsgeschichte Tirols VII: Das Hochmoor Schwemm bei Wachsee. Ber. nat.-med. Verein Innsbruck. 1988; 75:3 7-60.
88. Rybníček K, Rybníčková E. Mooruntersuchung im ob oberen. *Folia Geobot Phytotaxon*. 1977; 12: 245-291.
89. Krisai R. Die Ufervegetation der Trumer Seen (Salzburg). *Dissertationes Botanicae*. 1975; 29: 1-202.
90. Krisai R, Burgstaller B, Ehmer-Künkele U, Schiffer R, Wurm E. Die Moore des Ost-Lungaus - Heutige Vegetation, Entstehung, Waldgeschichte ihrer Umgebung. *Sauteria*, 1991; 5: 1-240.
91. Voigt R. Paläolimnologische und vegetationsgeschichtliche Untersuchungen an Sedimenten aus Fuschlsee und Chiemsee (Salzburg und Bayern). *Diss Bot*. 1996; 270:1-303.
92. Behre KE. Pollenanalytische Untersuchungen zur Vegetations- und Siedlungsgeschichte bei Flögeln und im Ahlenmoor (Elb-Weser-Winkel). *Probleme der Küstenforschung* 1976; 11: 101-118.
93. Jahns S. The later Holocene history of vegetation, land-use and settlements around the Ahlequellmoor in the Solling area, Germany. *Veg Hist Archaeobot*. 2005; 15: 57-65.

94. Willutzki H. Zur Waldgeschichte und Vermoorung sowie über Rekurrenzflächen im Oberharz. *Nova Acta Leopold.* 1962; 25: 1–52.
95. Chen SH. Neue Untersuchungen über die spät- und postglaziale Vegetationsgeschichte im Gebiet zwischen Harz und Leine (BDR). *Flora.* 1998; 181: 147-177.
96. Jahns S. Late-glacial and Holocene woodland dynamics and land-use history of the Lower Oder valley, north-eastern Germany, based on two, AMS 14 C-dated, pollen profiles. *Veg Hist Archaeobot.* 2000; 9: 111–123.
97. Jahns S. Palynological investigations into the Late Pleistocene and Holocene history of vegetation and settlement at the Löddigsee, Mecklenburg, Germany. *Veg Hist Archaeobot.* 2007; 16: 157–169.
98. Dörfler W. Pollenanalytische Untersuchungen zur Vegetations- und Siedlungsgeschichte im Süden des Landkreises Cuxhaven, Niedersachsen. *Probleme der Küstenforschung im südlichen Nordseegebiet.* 1989; 17: 1–75.
99. Knipping M. Pollenanalytische Untersuchungen zur Siedlungsgeschichte des Oberpfälzer Waldes. *Telma.* 1997; 27: 61–74.
100. Rösch M. Botanical evidence for prehistoric and medieval land use in Black Forest. In: Klápšte J, Sommer P, editors. *Medieval Rural Settlement in Marginal Landscapes, Ruralia 7.* Cardiff: Turnhout Brepols Publishers; 2007. pp. 335–343.
101. Rösch M. Vegetation und Waldnutzung im Nordschwarzwald während sechs Jahrtausenden anhand von Profundalkernen aus dem Herrenwieser See. *Standort.wald.* 2012; 47: 43-64.
102. Rösch M. Holocene sediment accumulation in the shallow water zone of Lower Lake Constance. *Arch Hydrobiol.* 1997; 4: 541–562.

103. Rösch M, Ostendorf W. Pollenanalytische, torf- und sedimentpetrographische Untersuchungen an einen telmatischen Profil vom Bodensee-Ufer bei Gaienhofen. *Telma*. 1988; 18: 373-395.
104. Rösch M, Tserendorj G. a: Der Nordschwarzwald - früher besiedelt als gedacht? Pollenprofile belegen ausgedehnte vorgeschichtliche Besiedlung und Landnutzung. *Denkmalpflege in Baden-Württemberg*. 2011; 40:6 6-73.
105. Rösch M. Change of land use during the last two millennia as indicated in the pollen record of a profundal core from Mindelsee, Lake Constance region, southwest Germany. *Offa*. 2013; 69/70: 355-370.
106. Rösch M. Zur Vegetationsgeschichte des südlichen Kraichgau - Botanische Untersuchungen bei Großvillars, Gemeinde Oberderdingen, Landkreis Karlsruhe. *Fundberichte. Aus Baden-Württemberg*. 2005; 28/1: 839-370.
107. Rösch M. Long-term human impact as registered in an upland pollen profile from the southern Black Forest, southwestern Germany. *Veget. Hist. Archaeobot*. 2000; 9: 205-218.
108. Richard H, Eschenlohr L. Essai de corrélation entre les données polliniques et les données archéologiques : le cas des forêts de Lajoux dans les Franches-Montagnes (Lajoux, Ju, Suisse). *Rev. Archéom*. 1998; 22: 29-37.
109. Roos-Barracough F, van der Knaap WO, van Leeuwen JFN, Shotyk W. A Late-glacial and Holocene record of climate change from a Swiss peat humification profile. *Holocene*. 2004; 14: 7-19.
110. Hadorn P. Saint-Blaise/Bains des Dames, 1. Palynologie d'un site néolithique et histoire de la végétation des derniers 16000 ans. Neuchâtel. Musée cantonal d'archéologie. *Archéologie neuchâteloise*. 1994; 18: 1-121.

111. Ammann B. Introduction and Palynology: vegetational history and core correlation at Lobsigensee (Swiss Plateau). In: Lobsigensee - Late-Glacial and Holocene environments of a lake on the central Swiss Plateau. *Diss Bot.* 1985 87:127-170.
112. Magri D, Sadori L. Late Pleistocene and Holocene pollen stratigraphy at Lago di Vico, central Italy. *Veg Hist Archaeobot.* 1999; 8: 247-260.
113. Lotter AF, Eicher U, Birks HJB, Siegenthaler U. Late-glacial climatic oscillations as recorded in Swiss lake sediments. *J. Quat Sci.* 1992; 7: 187-204.
114. Lotter AF, Heiri O, Hofmann W, van der Knaap WO, van Leeuwen JFN, Walker IR, et al. Holocene timber-line dynamics at Bachalpsee, a lake at 2265 m a.s.l. in the northern Swiss Alps. *Veg Hist Archaeobot.* 2006; 15: 295-307.
115. Heeb K, Welten M. Moore und Vegetationsgeschichte der Schwarzenegg und des Molassevorlandes zwischen dem Aaretal unterhalb Thun und dem obern Emmental. *Mitteilungen der Naturforschenden Gesellschaft in Bern. Neue Folge.* 1972; 29: 1-54.
116. Ammann K. Der Oberaargletscher im 18., 19. und 20. Jahrhundert. *Zeitschrift für Gletscherkunde und Glazialgeologie XII.* 1976; 2: 253-291.
117. Dapples F, Lotter AF, van Leeuwen JFN, van der Knaap WO, Dimitriadis S, Oswald D (2002). Paleolimnological evidence for increased landslide activity due to forest clearing and land-use since 3600 cal BP in the western Swiss Alps. *J Paleomnol.* 2002; 27: 239-248.
118. van der Knaap WO, van Leeuwen JFN, Fankhauser A, Ammann B (2000). Palynostratigraphy of the last centuries in Switzerland based on 23 lake and mire deposits: chronostratigraphic pollen markers, regional patterns, and local histories. *Rev Palaeobot Palynol.* 2000; 108: 85-142.
119. Welten M. Vegetationsgeschichtliche Untersuchungen in den westlichen Schweizer Alpen: Bern-Wallis. *Denkschriften der Schweizerischen Naturforschenden Gesellschaft, Vol. 95.* DSNG 95, 1982. pp. 1-104.

120. Schneebeli M, Küttel M, Fäh J. Die dreidimensionale Entwicklung eines Hanghochmoores im Toggenburg, Schweiz. Vierteljahrsschrift der Naturforschenden Gesellschaft in Zürich. 1989; 134: 1-32.
121. Gfeller C, Oeschger H. Bern Radiocarbon Dates III. Radiocarbon, 1963; 5: 305-311.
122. Welten M. Pollenanalytische Untersuchungen zur Vegetationsgeschichte des Schweizerischen Nationalparks. Ergebnisse der wissenschaftlichen Untersuchungen im Schweizerischen Nationalpark. 1982; XVI/80: 1-43.
123. Bégeot C. Histoire de la végétation et du climat au cours du Tardiglaciaire et du début de l'Holocène sur le massif jurassien central à partir de l'analyse pollinique et l'étude des macrorestes végétaux. PhD Thesis, Université de Franche-Comté, Besançon, France; 2000.
124. Grüger J. Untersuchungen zur spätglazialen und frühpostglazialen Vegetationsentwicklung der Südalpen im Umkreis des Gardassees. Botanische Jahrbücher für Systematik Pflanzengeschichte und Pflanzengeographie. 1968; 88: 163-199.
125. Seiwald A. Beiträge zur Vegetationsgeschichte Tirols IV: Natzer Plateau - Villanderer Alm. Ber. nat.-med. Verein Innsbruck. 1980; 67: 31-72.
126. Brugiapaglia E. Dynamique de la végétation tardiglaciaire et holocène dans les Alpes Italiennes nord-occidentales. Unpublished thesis, Marseille, France; 1996.
127. Miras Y, Millet L, Guiter F, Ponel P, de Beaulieu JL, Goslar T. Dynamique des écosystèmes et impact de l'homme dans le secteur du col du Petit Saint Bernard au cours de l'Holocène. Actes du Programme Interreg "Alpis Graia", 2-4 mars, Aoste. 2006; 1: 31-50.
128. Ortu E, Peyron O, Bordon A, de Beaulieu JL, Siniscalco C, Caramiello R. Lateglacial and Holocene climate oscillations in the South-western Alps: An attempt quantitative reconstruction. Quatern Int. 2008; 190: 71-88.

129. Finsinger W, Bigler C, Krähenbühl U, Lotter AF, Ammann B. Human impacts and eutrophication patterns during the past ~200 years at Lago di Avigliana (N. Italy). *J Paleolimnol.* 2006; 36: 55-67.
130. Rösch M, Fischer E, Lechterbeck J, Wick L. Pollenanalysen an drei Bohrkernen aus dem Profundal des Ortasees (Piemont, Italien). In: A. Stobbe/U. Tegtmeier, *Verzweigungen, eine Würdigung für A.J. Kalis und J. Meurers- Balke, Frankfurter Archäologische Schriften.* 2012; 18: 225-247.
131. de Beaulieu JL. Contribution pollenanalytique à l'histoire tardiglaciaire et Holocène de la végétation des Alpes méridionales françaises. PhD Thesis, Université d'Aix-Marseille, Marseille, France; 1977.
132. Kaltenrieder P, Procacci G, Vanniere B, Tinner W. Vegetation and fire history of the Euganean hills (Colli Euganei) as recorded by Lateglacial and Holocene sedimentary series from lago della costa (northeastern Italy). *Holocene.* 2010; 20: 679-695.
133. Watson CS. The vegetational history of the northern Apennines, Italy: information from three new sequences and a review of Regional vegetational change. *J Biogeogr.* 1996; 23: 805-841.
134. Drescher-Schneider R., de Beaulieu JL, Magny M, Walter-Simonnet AV, Bossuet G, Millet L, et al. Vegetation history, climate and human impact over the last 15,000 years at Lago dell'Accesa (Tuscany, Central Italy). *Veg Hist Archaeobot.* 2007; 16: 279-299.
135. Brugiapaglia E, de Beaulieu JL. Etude de la dynamique végétale tardiglaciaire et Holocène en Italie centrale: le marais de Colfiorito (Ombrie). *C.R. Acad. Sci. Paris*, 1995; t. 321, série IIa: 617-622.
136. Vescovi E, Kaltenrieder P, Tinner W. Late-glacial and Holocene vegetation history of Pavullo nel Frignano, Northern Apennines, . *Rev Palaeobot Palynol.* 2010; 160: 32-45.

137. Bosi G, Mazzanti MB, Florenzano A, Massamba N'siala I, Pederzoli A, Rinaldi R, et al. Seeds/fruits, pollen and parasite remains as evidence of site function: piazza Garibaldi - Parma (N Italy) in Roman and medieval times. . J Archaeol Sci. 2011; 38: 1621-1633.
138. Kelly MG, Huntley B. An 11000 year record of vegetation and environment from Lago di Martignano, Latium, Italy. J Quaternary Sci. 1991; 6: 209-224.
139. Mercuri AM, Baldini Mazzanti M, Florenzano A, Montecchi MC, Rattighieri E. *Olea, Juglans and Castanea*: the OJC group as pollen evidence of the development of human-induced environments in the Italian peninsula. Quat. Int. 2013; 303: 24-42.
140. Russo Ermolli E, di Pasquale G. Vegetation dynamics of south-western Italy in the last 28 kyr inferred from pollen analysis of a Tyrrhenian Sea core. Veget Hist Archaeobot 2002; 11: 211-219.
141. Allen JRM, Huntley B. last interglacial palaeovegetation, palaeoenvironments and cronology: a new record from lago Grande di Monticchio, southern Italy. Quat Sci Rev. 2009; 28: 1521-1538.
142. Mercuri AM; Florenzano A; Massamba N'siala I; Olmi L; Roubis D; Sogliani F. Pollen from archaeological layers and cultural landscape reconstruction: case studies from the Bradano Valley (Basilicata, southern Italy). Plant Biosyst. 2010; 144: 888-901.
143. Garnaud S, Lesueur P, Clet-Pellerin M, Lesourd S, Garlan T, Lafite R, et al. Holocene to modern fine-grained sedimentation on macrotidal shoreface-to -inner-shelf setting (eastern Bay of the Seine, France). Mar Geol. 2003; 202:33-54.
144. Barbier D. Histoire de la végétation du nord-mayennais de la fin du Weichsélien à l'aube du XXIeme siècle. Mise en évidence d'un Tardiglaciaire armoricain. Interactions Homme-Milieu. PhD Thesis, Université de Nantes. Biologie. Spécialité: Palynologie. 1999.

145. Clet-Pellerin M, Helluin M, Pellerin J, Pilet-Lemiere J, Fontugne M. L'évolution des environnements végétaux pendant les deux derniers millénaires dans la région de Fougères (Ille-et-Vilaine, France). *Palynosciences*. 1993; 2: 39-55.
146. Billard C, Clet-Pellerin M, Lautridou JP, Giffault M. Un site protohistorique littoral dans le havre de la Vanlee à Lingreville et Bricqueville-sur-mer (Manche). *Rev Archéol Ouest*. 1995; 12:73-110.
147. Visset L, Sellier D, L'Helgouach J. Le paléoenvironnement de la région de Carnac. Sondage dans le marais de Kerduel, La Trinité-sur-Mer (Morbihan). *Rev Archéol Ouest*. 1995; 12: 57-71.
148. Ouguerram A, Visset L. Palynologie de la tourbière de Nay dans la vallée de l'Erdre, affluent de la Loire (Massif armoricain, France). *Histoire de la végétation et du peuplement humain. Journal de la Société botanique de France*, 2001; 13:35-45.
149. Verron G. Le marais de Marchésieux. Découvertes de l'âge du Bronze et étude palynologique des tourbes. *Gallia Préhist*. 1977; 20-2: 370-374.
150. Visset L, Barbier D, Ouguerram A. Le paysage végétal dans le Bas-Maine (Mayenne, France), le long de la vallée de l'Erve, de la fin du Mésolithique à l'époque récente [Botanic landscape in Bas-maine (Mayenne, France), along the Erve valley, from the end of Mesolithic to recent times]. *Rev Archéol Ouest*. 2005; 22: 85-92.
151. Piana J, Carcaud N, Cyprien AL, Visset L, Leroy D. Dynamique paysagère tardiglaciaire et holocène dans la vallée du Loir à Pezou (Loir-et-Cher): développements méthodologiques et premiers résultats. *Norois*. 2009; 213: 73-88.
152. Joly C, Visset L, Scaon C, Pont-Tricoire C, Froquet-Uzel H. Archéologie préventive et évolution du paysage végétal de l'Age du Fer au Moyen Age dans le Gâtinais: mise en évidence de culture de chanvre et d'activités de rouissage (Courcelles et Sceaux-en-Gâtinais, Loiret, France). [Preventive archaeology and evolution of the vegetation landscape from the



Iron Age to the Middle Ages in Gâtinais: highlighting hemp culture and retting activities (Courcelles and Sceaux-en-Gâtinais, Loiret, France)]. *ArchéoSciences, revue d'archéométrie*. 2008; 32: 15-30.

153. De Valk EJ. Late Holocene and present vegetation of the Kastelberg (Vosges, France). PhD Thesis, University of Utrecht, Utrecht, The Netherlands. 1981.

154. Gauthier E. Evolution de l'impact de l'homme sur la végétation du massif jurassien au cours des quatre derniers millénaires. Nouvelles données palynologiques. PhD Thesis, Archéologie-Préhistoire Besançon, Université de Franche-Comté, UFR des Sciences de l'Homme et de la Société. 2001.

155. Clerc J. Recherches pollenanalytiques sur la paléo-écologie Tardiglaciaire et Holocène du Bas-Dauphiné. PhD Thesis, Université St. Jérôme, Marseille, France. 1988.

156. Bossuet G, Ruffaldi P, Magny M, Richard H, Mouthon J. Dynamique et approche quantitative des remplissages fini- et postwürmiens du bassin lacustre de Cerin (Jura, France). *B Soc Geol Fr*. 1996; 167: 483-493.

157. Noël H, Garbolino E, Brauer A, Lallier-Vergès E, de Beaulieu JL, Disnar JR. Human impact and soil erosion during the last 5000 yrs as recorded in lacustrine sedimentary organic matter at Lac d'Annecy, the French Alps. *J Paleolimnol*. 2001; 25: 229-244.

158. Joly C, Visset L. Evolution of vegetation landscapes since the Late Mesolithic on the French West Atlantic coast. *Rev Palaeobot Palynol*. 2009; 154: 124-179.

159. de Beaulieu JL, Kostenzer J, Reich K. Dynamique forestière holocène dans la haute vallée de l'Arve (Haute-Savoie) et migrations de *Abies* et *Picea* dans les Alpes occidentales. *Diss Bot*. 1993; 196: 387-398.

160. de Beaulieu JL, Goeury C. Zonation automatique appliquée à l'analyse pollinique: exemple de la narse d'Ampoix (Puy de Dome, France). *Bulletin de l'Association Française pour l'Etude du Quaternaire*. 1987; 1: 49-61.

161. Jouffroy-Bapicot I, Vannière B, Gauthier E, Richard H, Monna F, Petit C. 7000 years of vegetation history and land-use changes in the Morvan Mountains : A regional synthesis. *Holocene*. 2013; 23: 1888-1902.
162. Reille M, de Beaulieu JL. Analyse pollinique de l'étang de Cheylade (Massif Central, France): histoire tardiglaciaire et holocène de la végétation de la plaine de Saint-Flour. *CR Acad Sc Paris*. 1981; 292: 243-246.
163. Miras Y. L'analyse pollinique du plateau de Millevaches (Massif central, France) et de sites périphériques limousins et auvergnats: Approche des paléoenvironnements, des systèmes agro-pastoraux et évolution des territoires ruraux. [The pollen analysis of the plateau de Millevaches (Massif central, France) and of surrounding sites in Limousin and Auvergne] Thesis of Biology. Université de Franche-Comté. 2004.
164. de Beaulieu JL, Pons A, Reille M. Recherches pollenanalytiques sur l'histoire de la végétation de la bordure nord du Massif du Cantal (Massif-Central, France). *Pollen et Spores* 1982; 24: 251-300.
165. Reille M, de Beaulieu JL. History of the Würm and Holocene vegetation in western Velay (Massif Central, France): a comparison of pollen analysis from three corings at Lac du Bouchet. *Rev Palaeobot Palynol*. 1988; 54: 233-248.
166. Richard H. Nouvelles données polliniques en Bresse: le marais de La Peupleraie à Le Miroir (Saône-et-Loire, France) [New pollinic data in Bresse: the peat bog of La Peupleraie at Le Miroir (Saône-et-Loire)]. *Comptes rendus de l'Académie des sciences. Série 2. Sciences de la terre et des planets*. 1996; 323: 531-538.
167. Vannière B, Martineau R. Histoire des feux et pratiques agraires du Néolithique à l'âge du Fer en région Centre: implications territoriales, démographiques et environnementales. *Gallia Préhist*. 2005; 47: 167-186.

168. Miras Y, Guenet P, Cruz F, Garcia JP, Petit C, Guillaumet JP. Gestion des ressources naturelles dans le Pays de Tulle: impacts paysagers et histoire du châtaignier (*Castanea sativa* Mill.) de l'Antiquité à la Renaissance d'après la palynologie. *Aquitania*. 2013; 29: 311-330.
169. Guenet P. Analyses pollenanalytique en Artense et sur le plateau de Millevaches (Massif Central, France). *Palynosciences*. 1993; 2: 79-108.
170. Surmely F, Miras Y, Guenet P, Nicolas V, Savignat A, Vannièrè B, et al. Occupation and land-use history of a medium mountain from the Mid-Holocene: A multidisciplinary study performed in the South Cantal (French Massif Central). *CR Palevol*. 2009; 8: 737-748.
171. Monna F, Petit C, Guillaumet JP, Jouffroy-Bapicot I, Blanchot C, Dominik J, et al. History and Environmental Impact of Mining Activity in Celtic Aeduan Territory Recorded in a Peat Bog (Morvan, France). *Research*. 2004; 38: 665-673.
172. Castanet C. La Loire en val d'Orléans. Dynamiques fluviales et socio-environnementales durant les derniers 30 000 ans: de l'hydrosystème à l'anthroposystème. Master Thesis in Archéologies Environnementales et Géoarchéologie, Université de Paris 1, Panthéon-Sorbonne. 2008.
173. Miras Y, Guenet P, Richard H. Holocene vegetation, landscape and reconstruction of human activity from Prehistory to the Roman period based on new pollen data performed in "the Plateau de Millevaches" (Limousin, Massif Central, France). *Quaternaire*. 2011; 22: 147-164.
174. Miras Y, Guenet P, Richard H. La genèse du paysage culturel du plateau de Millevaches (Limousin, Massif Central, France): plus de 2000 ans d'histoire révélés par l'analyse pollinique. In: Grandcoing P. editor. *Paysage et environnement en Limousin, de l'Antiquité à nos jours*. Limoges: Presses Universitaires de Limoges; 2010. pp. 99-124.

175. Cyprien AL, Visset L, Charrieau L. Etudes palynologiques du site de la Grande Brousse, Vallée de la Choisille, Communes de Cérelles et Chanceaux-sur-Choisille (Indre-et-Loire). Rapport Définitif. Université de Nantes. 2004.
176. Voeltzel D. Recherches pollenanalytiques sur la végétation holocène de la plaine alluviale de l'estuaire de la Loire et des coteaux environnants. PhD Thesis, University of Aix-Marseille, France. 1987.
177. Cyprien AL, Visset L. Analyse palynologique du site de Bois-Jésus BJE12 - Rapport complémentaire. Université de Nantes. 2006.
178. Visset L, Pont C, Carcaud N, Bernard J, Violot JM. Etude paléoenvironnementale de la vallée du Lane du Néolithique au Moyen-Age, Saint Nicolas de Bourgueil (Indre-et-Loire), la Prairie du Cassoir [Palaeoenvironmental study of the Loire valley from the Neolithic to the Middle Ages]. *Quaternaire*. 1999; 10: 247-261.
179. Cyprien AL, Carcaud N, Visset L. Etude paléoenvironnementale du Marais de Distré (Saumurois): géoarchéologie d'une zone humide depuis le Préboréal. *Quaternaire*. 2001; 12: 89-101.
180. Carcaud N, Garcin M, Visset L, Musch J, Burnouf J. Nouvelle lecture de l'évolution des paysages fluviaux à l'Holocène dans le bassin de la Loire moyenne. In: Bravard JP, Magny M, editors. *Les fleuves ont une histoire, paléo-environnement des rivières et des lacs français depuis 15000 ans*. Errance; 2002. pp. 71–84.
181. Cyprien AL. Chronologie de l'interaction de l'homme et du milieu dans l'espace central et aval de la Loire (Ouest de la France). Thesis in Biological Science, Université de Nantes. 2001.
182. Visset L. Etude pollenanalytique de quelques sites du Marais Poitevin. *Bulletin de l'Association Française pour l'étude du Quaternaire*. 1987; 2: 81-91.

183. Joly C, Visset L. Etude paléoenvironnementale de la Grande Prée de Varades (La boire Torse) dans le bassin aval de la Loire (Loire-Atlantique, France). *Rev Arch Loir.* 2011; 35: 9-16.
184. Ouguerram A. Histoire de la vallée de l'Erdre (affluent de la Loire, Massif armoricain, France) de la fin du tardiglaciaire aux époques actuelles. Thesis in Biological Science, Université Moulay Ismaïl (Maroc) and Université de Nantes . 2002.
185. Diot MF, Tastet JP. Paleo-environnements Holocenes et limites chrono-climatiques enregistrés dans un marais estuarien de la Gironde . *Quaternaire.* 1995; 6: 63-75.
186. Poirier N, Morin E, Joly C, Leturcq S, Visset L. Occupation du sol et impact érosif dans la vallée de la Choisille (France, Indre-et-Loire): approches croisées pour la restitution des paysages anciens. [Land Use Dynamics and their Impact on Erosion in the Choisille Valley (France, Indre-et-Loire): Crossed Approaches to describe Past Landscapes]. *ArchéoSciences, revue d'archéométrie.* 2013; 37: 67-88.
187. Bernard J. Paléoenvironnement du Pays de Retz et du marais breton-vendéen. PhD Thesis, Université de Nantes. 1996.
188. Marchand G, Tessier M, Bernard J. Les occupations mésolithiques et néolithiques de la Fillauderie (Saint-Père-en-Retz, Loire-Atlantique) et la préhistoire récente de la basse vallée du Boivre. *Rev Arch Ouest* 1999; 16: 39-65.
189. Cyprien AL, Visset L. Complément à l'étude palynologique du sondage Parcay 1 (Vallée de la Vienne), Laboratoire d'Ecologie et des Paléoenvironnements Atlantiques, 1 vol., dactyl., Université de Nantes. 2007.
190. Wegmüller S. Pollenanalytische Untersuchungen zur spät- und postglazialen Vegetationsgeschichte der französischen Alpen (Dauphiné). Verlag Paul Haupt Bern. 1977; 1: 1-185.

191. Nakagawa T. Etudes palynologiques dans les Alpes Françaises centrales et méridionales: histoire de la végétation Tardiglaciaire et Holocène [Pollen studies in the central meridional French Alps: Lateglacial and Holocene vegetation history] PhD Thesis of Biology and Ecology, University of Marseille. 1998.
192. Puertas O. Premiers indices polliniques de néolithisation dans la plaine de Montpellier (Hérault, France). *Bull Soc Préhist Fr.* 1999; 96: 15-20.
193. Sanchez-Goñi MF. Analyse palynologique de l'Etang d'Ouveillan. In: Guilaine I, editor. *Temps et espace dans le bassin de l'Aude du Néolithique à l'Age du Fer.* CNRS; 1995. pp 265-275.
194. Walsh K, Mocci F. 9000 ans d'occupation du sol en moyenne et haute montagne: la vallée de Freissinières dans le Parc national des Ecrins (Freissinières, Hautes- Alpes). *Archéologie du Midi Médiéval.* 2003; 21: 185-198.
195. Argant J, Argant A (2000). Mise en évidence de l'occupation ancienne d'un site d'altitude: analyse pollinique du lac de Lauzon (Drôme) *Géologie Alpine. Mém H S.* 2000; 31: 61-71.
196. Muller SD, David F, Wicha S. Impact de l'exposition des versants et de l'anthropisation sur la dynamique forestière dans les alpes du sud . *Géogr Phys Quat.* 2000; 54: 231-243.
197. Pulido M. Conséquences de l'anthropisation sur la dynamique postglaciaire de la végétation dans le sud du Massif Central, France. [Anthropogenic impact on the postglacial vegetation dynamics in South Massif Central, France] Thesis of Palaeoecology. University of Marseille. 2006.
198. Jouffroy-Bapicot I, Pulido M, Baron S, Galop D, Monna F, Lavoie M, et al. Environmental impact of early palaeometallurgy: pollen and geochemical analysis. *Veg Hist Archaeobot.* 2007; 16: 251-258.

199. Burjachs F, Pérez-Obiol RP, Roure JM, Julia R. Dinamica de la vegetation durante el Holoceno en la isla de Mallorca. In: X Simposio de Palinologia (APLE), Valencia, Spain; 1994. pp. 199-210.
200. Yll EI, Pérez-Obiol RP, Pantaléon-Cano J, Roure JM. Palynological evidence for climatic change and human activity during the Holocene on Minorca (Balearic Islands). *Quat Res.* 1997; 48: 339-347.
201. Yll EI, Pérez-Obiol RP, Pantaléon-Cano J, Roure JM (1995). Dinamica del paisaje vegetal en la vertiente Mediterranea de la peninsula Iberica e islas Baleares desde el tardiglaciar hasta el presente. In: Aleixandre T, Perez A, editors. Reconstitution de la ambiente y cambios climaticos durante el Cuaternario. Centro de Ciencias Medioambientales. CSIC, Madrid, Spain; 1995. pp. 319-328.
202. Pantaléon-Cano J, Yll EI, Pérez-Obiol RP, Roure J.M. Palynological evidence for vegetational history in semi-arid areas of the western Mediterranean (Almeria, Spain). *Holocene.* 2003; 13:109-119.
203. Cortés-Sánchez M, Morales-Muñiz A, Simón-Vallejo MD, Lozano-Francisco MC, Vera-Peláez JL, Finlayson C, et al. Earliest Known Use of Marine Resources by Neanderthals. *PLoS ONE.* 2011; 6: 1-15.
204. Pantaléon-Cano J, Pérez-Obiol RP, Roure JM. La representacion del paisaje vegetal del area de Barcelona durante en ultimo milenio a partir del analisis polinico de sedimentos marinos del delta del rio Besos datados por 210Pb. In: Mateu I, Dupre M, Guemes J, Burgaz ME, editors. Trabajos de palinologia basica y aplicada. Universitat de València; 1994. pp. 211-223.
205. López-Sáez JA, López-Merino L, Alba-Sánchez F, Pérez-Díaz S, Abel-Schaad D, Carrión JS. Late Holocene ecological history of *Pinus pinaster* forests in the Sierra de Gredos of central Spain. *Plant Ecol.* 2010; 206: 195-209.

206. Carrión JS, van Geel B (1999). Fine-resolution Upper Weichselian and Holocene palynological record from Navarrés (Valencia, Spain) and a discussion about factors of Mediterranean forest succession. *Rev Palaeobot Palynol.* 1999; 106: 209-236.
207. Carrion JS, Sanchez-Gomez P (1992). Palynological data in support of the survival of walnut (*Juglans regia* L.) in the western Mediterranean area during last glacial times. *J Biogeogr.* 1992; 19: 623-630.
208. Carrión JS., Dupré M, Fumanal MP, Montes R. A palaeoenvironmental study in the semiarid southeastern Spain: the palynological and sedimentological sequence at Pernerias Cave (Lorca, Murcia). *J Archaeol Sci.* 1995; 22: 355-367.
209. Penalba MC. The history of the Holocene vegetation in northern Spain from pollen analysis. *J Ecol.* 1994; 82: 815-832.
210. Mariscal B. Estudio polinico de la turbera del Cueto de la Avellanosa polaciones (Cantabria). VI Reunion do grupo espanol de traballo de Quaternario. Cuadernos do laboratorio xeologico de laxe. 1983; 5: 205-226.
211. Allen JRM, Huntley B, Watts WA. The vegetation and climate of northwest Iberia over the last 14,000 years. *J Quat Sci.* 1996; 11: 125-147.
212. López-Merino L, Silva-Sánchez N, Kaal J, López-Sáez JA, Martínez-Cortizas A. Post-disturbance vegetation dynamics during the Late Pleistocene and Holocene : An example from NW Iberia. *Global Planet Change.* 2012; 92- 93: 58-70.
213. López-Sáez JA, López-Merino L, Mateo MA, Serrano O, Pérez-Díaz S, Serrano L. Palaeoecological potential of the marine organic deposits of *Posidonia oceanica*: A case study in the NE Iberian Peninsula. *Palaeogeogr Palaeoclimatol Palaeoecol.* 2009; 271: 215-224.
214. Penalba MC. Dynamique de vegetation Tardiglaciaire et Holocene du centre-nord de l'Espagne d'après l'analyse pollinique. PhD Thesis, Université d'Aix-Marseille, Marseille, France. 1989.



215. Abel-Schaad D, Hernández-Carretero AM, López-Sáez JA, Pulido-Díaz FJ, López-Merino L, Martínez-Cortizas A. Evolución de la vegetación en la Sierra de Gata (Cáceres-Salamanca, España) durante el Holoceno reciente. Implicaciones biogeográficas. *Rev Esp Micropaleontol.* 2009; 41: 91-105.
216. Dorado-Valiño M, López-Sáez JA, García-Gómez E. Contribution to the European Pollen Database. 21. Patateros, Toledo Mountains (central Spain). *Grana.* 2014; 53: 171-173.
217. Abel-Schaad D, López-Sáez JA. Vegetation changes in relation to fire history and human activities at the Peña Negra mire (Bejar Range, Iberian Central Mountain System, Spain) during the past 4,000 years. *Veg Hist Archaeobot.* 2013; 22: 199-214.
218. López-Merino L, López-Sáez JA, Pérez-Díaz S, Carrión JS. 2000 years of pastoralism and fire shaping high-altitude vegetation of Sierra de Gredos in central Spain. *Rev. Palaeobot. Palynol.* 2009; 158: 42-51.
219. van der Knaap WO, van Leeuwen JFN. Late-Glacial and early-Holocene vegetation succession, altitudinal vegetation zonation, and climatic change in the Serra da Estrela, Portugal. *Rev Palaeobot Palynol.* 1997; 97: 239-285.
220. van der Brink LM, Janssen CR. The effect of human activities during cultural phases on the development of montane vegetation in the Serra da Estrela, Portugal. *Rev Palaeobot Palynol.* 1985; 44: 193-215.
221. Mateus JE. Holocene and present-day ecosystems of the Carvalhal region, South-west Portugal. PhD Thesis, University of Utrecht, Utrecht, The Netherlands. 1992.
222. Gremmen WHE, Bottema S. Palynological investigations in the Syrian Gazira. In: Kühne H. editor. Die rezente Umwelt von Tell Šēh Hamad und Daten zur Umweltrekonstruktion der assyrischen Stadt Dūr Katlimmu, Berlin; 1991. pp. 105–116.

223. Yasuda Y, Kitagawa H, Nakagawa T. The earliest record of major anthropogenic deforestation in the Ghab Valley, northwest Syria: a palynological study. *Quatern Int.* 2000; 73/74: 127-136.
224. Neumann FH, Kagana EJ, Schwab MJ, Stein M. Palynology, sedimentology and palaeoecology of the late Holocene Dead Sea. *Quat Sci Rev.* 2007; 26: 1476-1498.
225. Neumann F, Scholzel C, Litt T, Hense A, Stein M. Holocene vegetation and climate history of the northern Golan heights (Near East). *Veget Hist Archaeobot.* 2007; 16: 329-346.
226. Baruch U. The Late Holocene Vegetational History of Lake Kinneret (Sea of Galilee), Israel. *Paléorient.* 1986; 12: 37-48.
227. van Zeist W, Baruch U, Bottema S (2009). Holocene palaeoecology of the Hula area, northeastern Israel. In: Kaptijn K, Petit LP. editors. *A Timeless Vale. Archaeological and Related Essays on the Jordan Valley in Honour of Gerrit Van Der Kooij on the Occasion of his Sixty-Fifth Birthday.* Leiden: Leiden University Press. p 29-64.
228. Leroy SAG, Kakroodi AA, Kroonenberg S, Lahijani H, Alimohammadian H, Nigarov A. Holocene vegetation history and sea level changes in the SE corner of the Caspian Sea: relevance to SW Asia climate. *Quat Sci Rev.* 2013; 70: 28-47.
229. Djamali M, de Beaulieu JL, Miller NF, Andrieu-Ponel V, Ponel P, Lak R, Sadeddin N, et al. Vegetation history of the SE section of the Zagros Mountains during the last five millennia; a pollen record from the Maharlou Lake, Fars Province, Iran. *Veg Hist Archaeobot.* 2009; 18: 123-136.
230. Djamali M, de Beaulieu JL, Shah-hosseini M, Andrieu-Ponel V, Ponel P, Amini A, et al. A late Pleistocene long pollen record from Lake Urmia, NW Iran. *Quat Res.* 2008; 69: 413-420.

231. Henry AG, Brooks AS, Piperno DR. Microfossils in calculus demonstrate consumption of plants and cooked foods in Neanderthal diets (Shanidar III, Iraq; Spy I and II, Belgium). *Proc Natl Acad Sci USA*. 2011; 108: 486-491.
232. Kvavadze E, Rukhadze LP. Vegetation and climate of the Holocene of Abkhazia. Metsniereba, Tbilisi, Georgia, 1989.
233. Kvavadze EV. The new data on the stratigraphy and palaeogeography of the Holocene of the Colchida lowland. In: Quaternary system of Georgia. Tbilisi, Metsniereba (in Russian); 1982. pp. 123-130.
234. Kvavadze EV, Efremov YuV. The results of palynological studies of the Holocene deposits in the highlands of the Lagodekhi Reservation (Eastern Georgia). *Bulletin of the Georgian Academy of Sciences*. 1990; 139: 641-644.
235. Bar-Yosef O, Belfer-Cohen A, Mesheviliani T, Jakeli N, Bar-Oz G, Boaretto E, Goldberg P, et al. Dzudzuana: an Upper Palaeolithic cave site in the Caucasus foothills (Georgia). *Antiquity*. 2011; 85: 331-349.
236. Messager E, Lebreton V, Marquer L, Russo-Ermolli E, Orain R, Renault-Miskovsky J, et al. Palaeoenvironments of early hominins in temperate and Mediterranean Eurasia: new palaeobotanical data from Palaeolithic key-sites and synchronous natural sequences. *Quaternary Sci Rev* 2011; 30: 1439-1447.
237. Kvavadze EV, Connor SE. *Zelkova carpinifolia* (Pallas) K. Koch in Holocene sediments of Georgia- an indicator of climatic optima. *Rev Palaeobot Palynol*. 2005; 133: 69-89.
238. Bordon A, Peyron O, Lezine AM, Brewer S, Fouache E. Pollen-inferred Late-Glacial and Holocene climate in southern Balkans (Lake Maliq). *Quatern Int*. 2009; 200: 19-30.
239. Sadori L, Koutsodendris A, Panagiotopoulos K, Masi A, Bertini A, Combourieu-Nebout N, et al. Pollen-based paleoenvironmental and paleoclimatic change at Lake Ohrid (SE Europe) during the past 500 ka. *Biogeosciences* 2016; 13: 1423–1437.

240. Huntley B, Birks HJB. An atlas of present and past pollen maps for Europe, 0–13,000 years ago. 1st ed New York: Cambridge University Press; 1983.
241. Cordova CE, Lehmanb PH. Archaeopalynology of synanthropic vegetation in the chora of Chersonesos, Crimea, Ukraine. *J Archaeol Sci.* 2003; 30: 1483–1501.
242. Kvavadze EV. Redeposited pollen in recent Holocene sediments of the Caucasus Mountains. *Grana.* 1996; 35: 33–37.
243. Geraga M, Tsaila-Monopolis St, Ioakim Chr, Papatheodorou G, Ferentinos G. Evaluation of palaeoenvironmental changes during the last 18,000 years in the Myrtoon basin, SW Aegean Sea. *Palaeogeogr. Palaeoclimatol. Palaeoecol.* 2000; 156: 1-17.
